# Supplementary material for: A computational mechanistic study of Ni(0)-catalyzed annulation of aromatic amides with alkynes: the effects of directing groups
Source: Royal Society of Chemistry journal article supplement (doi:10.1039/c8qo01310a), 2019-01-01
Supplement: c8qo01310a1.pdf [file c8qo01310a1.pdf]

*Electronic Supplementary Information*

## **A Computational Mechanistic Study of Ni(0)-catalyzed Annulation of Aromatic Amides with Alkynes: The Effects of Directing Groups**

*Xin Zhang, Qi Zhao, Jia-Qi Fan, De-Zhan Chen\* and Jian-Biao Liu\**

*College of Chemistry, Chemical Engineering and Materials Science, Collaborative Innovation  
Center of Functionalized Probes for Chemical Imaging in Universities of Shandong, Institute of  
Molecular and Nano Science, Shandong Normal University, Jinan 250014, P. R. China.*

*E-mails: jianbiaoliu.thu@gmail.com; chendzh@sdu.edu.cn.*

|                                                                       |           |
|-----------------------------------------------------------------------|-----------|
| <b>1. Table of calculated energies and imaginary frequencies.....</b> | <b>S2</b> |
| <b>2. On the bonding between Ni and N atom of pyridine.....</b>       | <b>S4</b> |
| <b>3. On the possibility of triplet state.....</b>                    | <b>S6</b> |
| <b>4. Cartesian coordinates of all optimized structures.....</b>      | <b>S7</b> |

1. Table of calculated energies and imaginary frequencies.

**Table S1.** Calculated energies and imaginary frequencies.

| stationary point                       | thermal correction to Gibbs free energy at B3LYP/LANL2DZ/6-31G(d,p) (in a.u.) | single-point energy including solvation energy at M06/SDD/6-311+G(d,p) (in a.u.) | imaginary frequencies |
|----------------------------------------|-------------------------------------------------------------------------------|----------------------------------------------------------------------------------|-----------------------|
| <b>PPh<sub>3</sub></b>                 | 0.197235                                                                      | -1035.918595                                                                     |                       |
| <b>PhC≡CPh</b>                         | 0.125066                                                                      | -539.171419                                                                      |                       |
| <b>Ni(PPh<sub>3</sub>)<sub>2</sub></b> | 0.417133                                                                      | -2242.848138                                                                     |                       |
| <b>Ni(cod)<sub>2</sub></b>             | 0.291558                                                                      | -794.753355                                                                      |                       |
| <b>1</b>                               | 0.156992                                                                      | -687.053069                                                                      |                       |
| <b>3</b>                               | 0.380996                                                                      | -1893.979696                                                                     |                       |
| <b>TS1</b>                             | 0.376787                                                                      | -1893.947048                                                                     | 1133.66 <i>i</i>      |
| <b>4</b>                               | 0.381362                                                                      | -1893.985142                                                                     |                       |
| <b>4<sub>T</sub></b>                   | 0.376653                                                                      | -1893.9537031                                                                    |                       |
| <b>5</b>                               | 0.306242                                                                      | -1397.214328                                                                     |                       |
| <b>TS2</b>                             | 0.311979                                                                      | -1397.212969                                                                     | 165.29 <i>i</i>       |
| <b>6</b>                               | 0.317375                                                                      | -1397.243606                                                                     |                       |
| <b>TS3</b>                             | 0.316237                                                                      | -1397.219959                                                                     | 1289.31 <i>i</i>      |
| <b>7</b>                               | 0.134668                                                                      | -856.817299                                                                      |                       |
| <b>8</b>                               | 0.294033                                                                      | -1396.03803                                                                      |                       |
| <b>TS4</b>                             | 0.298905                                                                      | -1396.003553                                                                     | 218.25 <i>i</i>       |
| <b>9</b>                               | 0.300985                                                                      | -1396.042439                                                                     |                       |
| <b>TS5</b>                             | 0.301045                                                                      | -1396.001227                                                                     | 311.02 <i>i</i>       |
| <b>P1</b>                              | 0.304685                                                                      | -1225.086666                                                                     |                       |
|                                        |                                                                               |                                                                                  |                       |
| <b>3'</b>                              | 0.309189                                                                      | -1169.913821                                                                     |                       |
| <b>TS1'</b>                            | 0.309104                                                                      | -1169.883843                                                                     | 1082.20 <i>i</i>      |
| <b>4'</b>                              | 0.313504                                                                      | -1169.905977                                                                     |                       |
| <b>4'<sub>T</sub></b>                  | 0.304495                                                                      | -1169.8740155                                                                    |                       |
|                                        |                                                                               |                                                                                  |                       |
| <b>2</b>                               | 0.170650                                                                      | -746.208443                                                                      |                       |
| <b>10</b>                              | 0.39248                                                                       | -1953.113883                                                                     |                       |
| <b>TS6</b>                             | 0.387823                                                                      | -1953.085539                                                                     | 1059.89 <i>i</i>      |
| <b>11</b>                              | 0.38843                                                                       | -1953.10964                                                                      |                       |
|                                        |                                                                               |                                                                                  |                       |
| <b>2'</b>                              | 0.156213                                                                      | -745.688325                                                                      |                       |
| <b>12</b>                              | 0.615445                                                                      | -2988.571834                                                                     |                       |
| <b>TS7</b>                             | 0.610738                                                                      | -2988.554229                                                                     | 33.68 <i>i</i>        |
| <b>13</b>                              | 0.379192                                                                      | -1952.62077                                                                      |                       |
| <b>TS8</b>                             | 0.380781                                                                      | -1952.591814                                                                     | 772.63 <i>i</i>       |

|             |          |              |                  |
|-------------|----------|--------------|------------------|
| <b>14</b>   | 0.381703 | -1952.614415 |                  |
| <b>15</b>   | 0.309693 | -1455.851052 |                  |
| <b>TS9</b>  | 0.309844 | -1455.85176  | 340.13 <i>i</i>  |
| <b>16</b>   | 0.313937 | -1455.88927  |                  |
| <b>17</b>   | 0.476148 | -1995.072294 |                  |
| <b>TS10</b> | 0.47687  | -1995.054346 | 202.29 <i>i</i>  |
| <b>18</b>   | 0.479588 | -1995.106901 |                  |
| <b>TS11</b> | 0.482345 | -1995.07792  | 314.45 <i>i</i>  |
| <b>P2</b>   | 0.316746 | -1284.239528 |                  |
|             |          |              |                  |
| <b>15'</b>  | 0.310868 | -1455.840572 |                  |
| <b>TS9'</b> | 0.312149 | -1455.824837 | 216.17 <i>i</i>  |
| <b>16'</b>  | 0.314035 | -1455.838015 |                  |
|             |          |              |                  |
| <b>19</b>   | 0.438464 | -1689.49315  |                  |
| <b>TS12</b> | 0.433489 | -1689.458793 | 1149.50 <i>i</i> |
| <b>20</b>   | 0.252817 | -1149.07727  |                  |
| <b>21</b>   | 0.413814 | -1688.255217 |                  |
| <b>TS13</b> | 0.416296 | -1688.233972 | 227.87 <i>i</i>  |
| <b>22</b>   | 0.418575 | -1688.29551  |                  |
| <b>TS14</b> | 0.419222 | -1688.268636 | 314.28 <i>i</i>  |
| <b>23</b>   | 0.150221 | -916.652312  |                  |
| <b>24</b>   | 0.150321 | -916.625551  |                  |
| <b>26</b>   | 0.080257 | -610.511105  |                  |
| <b>27</b>   | 0.079777 | -609.017206  |                  |

## 2. On the bonding between Ni and N atom of pyridine.

To elucidate the bonding between Ni and N atom of pyridine, Bader's AIM (Atoms-In-Molecules) method<sup>1,2</sup> was used. The AIM analysis was performed by Multiwfn.<sup>3</sup>

In the AIM theory, a bond critical point (BCP) corresponds to the point where the electron density becomes a minimum along the bond path between interacting atoms. The molecular graphs in Fig. S1 show the presence of BCPs and ring critical points (RCPs) in species **4**, **6** and **9**. Particularly, the data show the presence of BCPs between the nickel atom and the nitrogen atom of pyridine in the three species. Furthermore, the magnitude of the electron density  $\rho(r)$  and Laplacian of the electron density  $\nabla^2\rho(r)$  at the BCP are given in Table S2. All the results indicate that there exists bonding between Ni and N of pyridine in the three complexes. In addition, our results are in consistent with the bonding in the symmetrical pincer palladacycles PdNCN and PdSCS reported by H. Cox.<sup>4</sup>

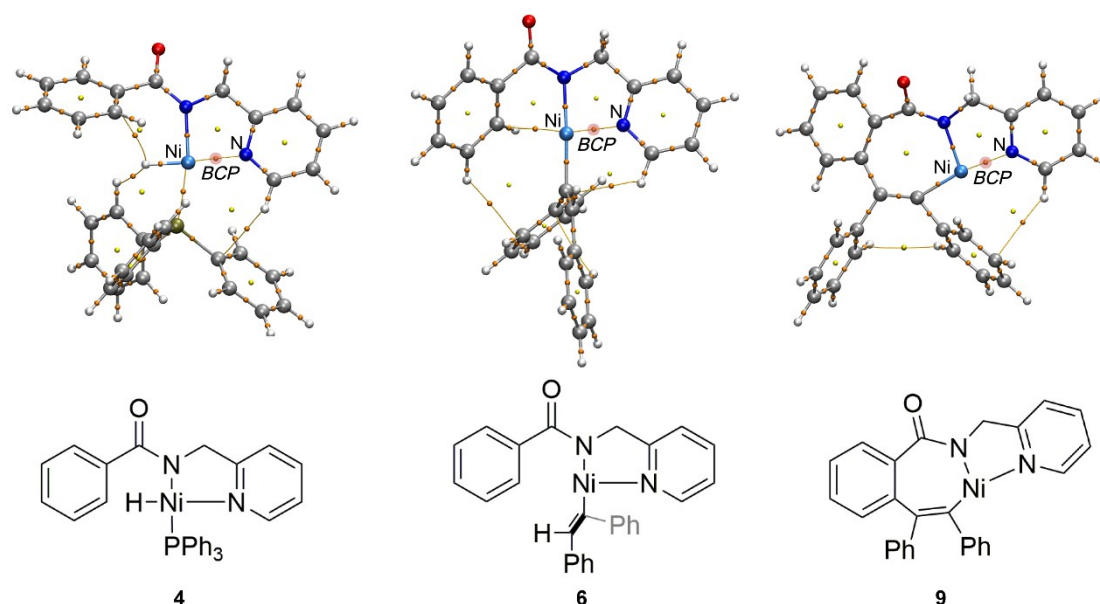

**Fig. S1** Molecular graphs with BCPs and RCPs for **4**, **6** and **9**.

**Table S2.** Electron density  $\rho(r)$  and Laplacian of the electron density  $\nabla^2\rho(r)$  at the BCP between Ni and N<sub>pyridine</sub>.

| complex  | $\rho(r)$ | $\nabla^2\rho(r)$ |
|----------|-----------|-------------------|
| <b>4</b> | 0.080     | 0.493             |
| <b>6</b> | 0.094     | 0.515             |
| <b>9</b> | 0.087     | 0.533             |

## References

- 1 R. F. W. Bader, *Acc. Chem. Res.*, 1985, **18**, 9–15.
- 2 R. F. W. Bader, *Atoms in Molecules: A Quantum Theory*, Oxford University Press, Oxford, UK, 1990.

3 T. Lu and F. Chen, *J. Comput. Chem.*, 2012, **33**, 580–592.

4 S. Boonseng, G. W. Roffe, J. Spencer and H. Cox, *Dalton Trans.*, 2015, **44**, 7570–7577.

### 3. On the possibility of triplet state.

We have considered the impact of the lowest-lying singlet and triplet electronic states during the optimization of species **4** and **4'**. As seen from **Fig. S2**, for **4** and **4'**, the triplet electronic states are higher in energy than their singlet state counterparts by 16.8 kcal/mol and 12.1 kcal/mol respectively.

Furthermore, we have performed TDDFT calculations on the key steps of the reactions during our study. The TDDFT results reveal that the first triplets are all higher in energy than the ground singlets. Therefore, the triplet potential energy surface (PES) is high-lying and the singlet and triplet surfaces do not cross during the reaction.

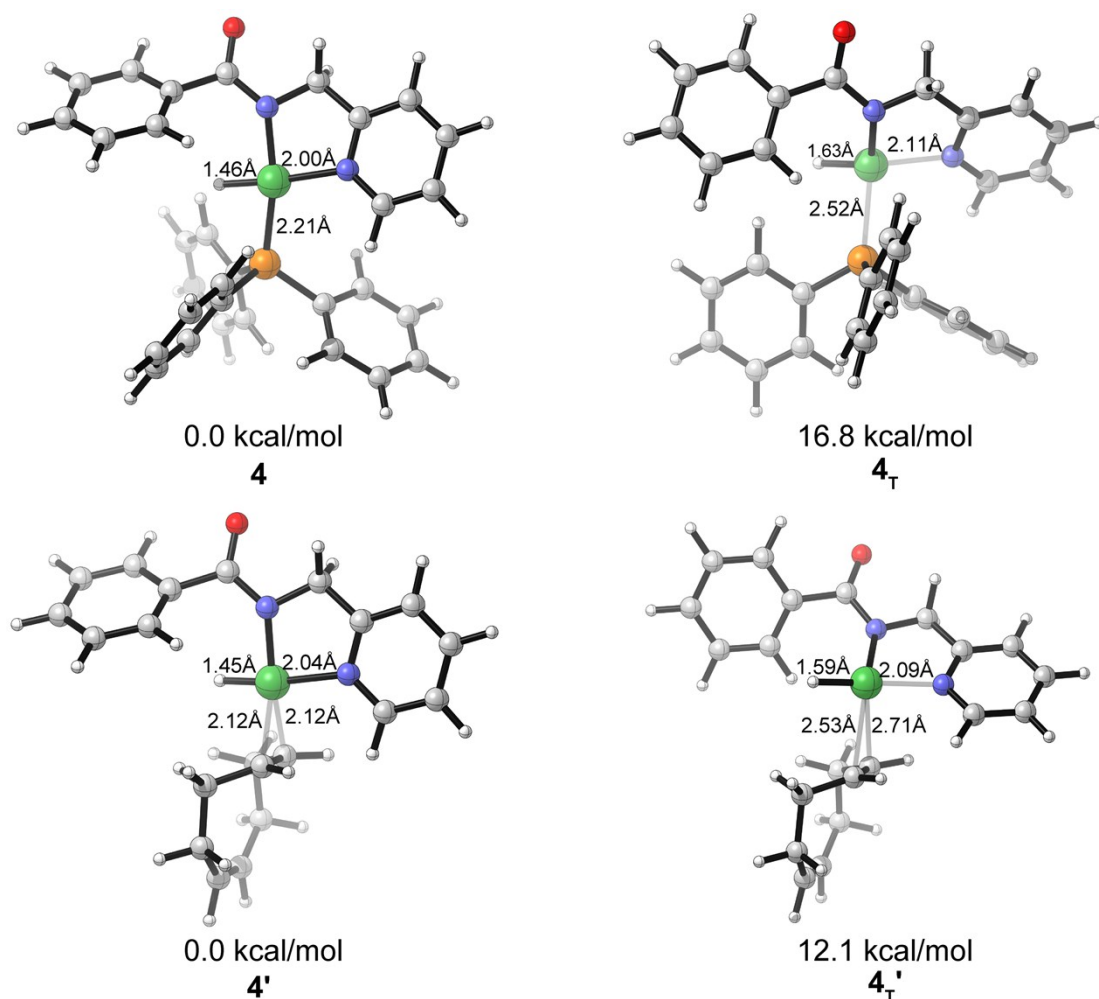

**Fig. S2** Optimized structures of the singlet **4**, **4'** and triplet **4<sub>T</sub>**, **4'<sub>T</sub>** with relative energies.

#### 4. Cartesian coordinates of all optimized structures.

##### PPh<sub>3</sub>

O 1

|   |             |             |             |
|---|-------------|-------------|-------------|
| P | 0.00506800  | 0.00334600  | -1.18869300 |
| C | -1.04623200 | 1.30651600  | -0.39251200 |
| C | -1.08031300 | 2.56461400  | -1.01869600 |
| C | -1.82867400 | 1.10756900  | 0.75537400  |
| C | -1.85907700 | 3.60005300  | -0.50186600 |
| H | -0.49567500 | 2.73222200  | -1.92071600 |
| C | -2.61757300 | 2.14095400  | 1.26625200  |
| H | -1.82649100 | 0.14184900  | 1.25159600  |
| C | -2.63225100 | 3.38949700  | 0.64219900  |
| H | -1.87001500 | 4.56733100  | -0.99778200 |
| H | -3.21935500 | 1.96853400  | 2.15520000  |
| H | -3.24732700 | 4.19212900  | 1.04089600  |
| C | 1.66002300  | 0.25710500  | -0.39316100 |
| C | 2.76578800  | -0.32826800 | -1.03385400 |
| C | 1.88108800  | 1.01148400  | 0.76954400  |
| C | 4.05287400  | -0.18257300 | -0.51601200 |
| H | 2.61688200  | -0.89924700 | -1.94773400 |
| C | 3.17138000  | 1.16687600  | 1.28170700  |
| H | 1.04506200  | 1.48320700  | 1.27736100  |
| C | 4.25913100  | 0.56807500  | 0.64364300  |
| H | 4.89492500  | -0.64668100 | -1.02316200 |
| H | 3.32513100  | 1.75593800  | 2.18251800  |
| H | 5.26233600  | 0.69070800  | 1.04365400  |
| C | -0.60420600 | -1.55908600 | -0.39797300 |
| C | -1.68817600 | -2.20255200 | -1.02032200 |
| C | -0.04028000 | -2.14889500 | 0.74343900  |
| C | -2.20837800 | -3.38915900 | -0.50389200 |
| H | -2.12586700 | -1.77087200 | -1.91786400 |
| C | -0.55345200 | -3.34381900 | 1.25364600  |
| H | 0.80372900  | -1.67643900 | 1.23670900  |
| C | -1.63977100 | -3.96455900 | 0.63487600  |
| H | -3.05039300 | -3.86933100 | -0.99598100 |
| H | -0.10300300 | -3.78821500 | 2.13783000  |
| H | -2.03737000 | -4.89431800 | 1.03351000  |

##### PhC≡CPh

O 1

|   |             |            |             |
|---|-------------|------------|-------------|
| C | 0.60816900  | 0.00002000 | 0.00001200  |
| C | -0.60816800 | 0.00002600 | -0.00000400 |

|   |             |             |             |
|---|-------------|-------------|-------------|
| C | 2.03823700  | 0.00000800  | 0.00000400  |
| C | 2.75410400  | -0.86474100 | -0.85136900 |
| C | 2.75412500  | 0.86474500  | 0.85137200  |
| C | 4.14690200  | -0.86118600 | -0.84794800 |
| H | 2.20784500  | -1.53341200 | -1.50970000 |
| C | 4.14692300  | 0.86116800  | 0.84793800  |
| H | 2.20788200  | 1.53342400  | 1.50970800  |
| C | 4.84775500  | -0.00001400 | -0.00000800 |
| H | 4.68683500  | -1.53318200 | -1.50969900 |
| H | 4.68687300  | 1.53315600  | 1.50968600  |
| H | 5.93442200  | -0.00002200 | -0.00001300 |
| C | -2.03823700 | 0.00000900  | -0.00000100 |
| C | -2.75410500 | -0.86473900 | 0.85137000  |
| C | -2.75412300 | 0.86474700  | -0.85137100 |
| C | -4.14690500 | -0.86118600 | 0.84794400  |
| H | -2.20785100 | -1.53340800 | 1.50970600  |
| C | -4.14692100 | 0.86116900  | -0.84794100 |
| H | -2.20787900 | 1.53342600  | -1.50970500 |
| C | -4.84775500 | -0.00001600 | 0.00000200  |
| H | -4.68683700 | -1.53318400 | 1.50969400  |
| H | -4.68686900 | 1.53315700  | -1.50968900 |
| H | -5.93442200 | -0.00002400 | 0.00000300  |

##### Ni(PPh<sub>3</sub>)<sub>2</sub>

O 1

|    |             |             |             |
|----|-------------|-------------|-------------|
| Ni | 0.00193900  | 0.04599500  | -0.11730100 |
| P  | -2.14784600 | 0.01526600  | -0.06017800 |
| C  | -2.96379500 | -1.40317600 | -0.93213700 |
| C  | -2.35782600 | -1.88678400 | -2.10400400 |
| C  | -4.14323100 | -2.01677900 | -0.47646200 |
| C  | -2.92858200 | -2.94534600 | -2.81440200 |
| H  | -1.43444500 | -1.42798000 | -2.44958900 |
| C  | -4.70880800 | -3.08561300 | -1.18368400 |
| H  | -4.62529800 | -1.66628200 | 0.43368900  |
| C  | -4.09656300 | -3.54986000 | -2.35307800 |
| H  | -2.44460300 | -3.31193200 | -3.71745800 |
| H  | -5.61705700 | -3.55140700 | -0.81689700 |
| H  | -4.53803800 | -4.38042200 | -2.89470800 |
| C  | -2.98260000 | 1.50704200  | -0.76670600 |
| C  | -2.34288000 | 2.74846400  | -0.58872300 |
| C  | -4.19643000 | 1.47174500  | -1.47568300 |
| C  | -2.91277900 | 3.92110900  | -1.08300800 |
| H  | -1.38940200 | 2.77891800  | -0.06018400 |
| C  | -4.75295500 | 2.64909600  | -1.98168000 |





|          |             |             |             |    |             |             |             |
|----------|-------------|-------------|-------------|----|-------------|-------------|-------------|
| H        | 1.67913700  | -2.51240900 | -1.25478700 | C  | -5.12402300 | 2.09658000  | 0.30753100  |
| H        | 2.88673200  | -0.89110000 | -2.44653000 | C  | -5.24726500 | 3.33445100  | -0.31976400 |
| H        | 3.55732900  | -0.13877100 | -1.02153900 | H  | -4.32930200 | 4.75827700  | -1.65770100 |
| H        | 3.16133100  | 2.38966900  | 0.32334700  | H  | -2.31299400 | 3.35140800  | -2.04624200 |
| H        | 1.68079800  | 2.51235100  | 1.25453700  | H  | -5.90429300 | 1.71976900  | 0.96039300  |
| Ni       | 0.00038300  | 0.00054600  | -0.00004700 | H  | -6.13356400 | 3.94027400  | -0.15012000 |
| <b>1</b> |             |             |             | C  | -3.93357100 | -0.01666200 | 0.82661800  |
| O 1      |             |             |             | O  | -4.94835000 | -0.51369800 | 1.32026800  |
| C        | 4.62974000  | 1.31397300  | 0.09081600  | N  | -2.70706000 | -0.60685000 | 0.93419600  |
| C        | 3.44318300  | 1.85502600  | -0.40831900 | C  | -2.52566100 | -1.93328000 | 1.50376000  |
| C        | 2.29244400  | 1.06972600  | -0.48386500 | H  | -3.43275500 | -2.17404700 | 2.05919700  |
| C        | 2.31941700  | -0.26825600 | -0.06379400 | H  | -1.67864800 | -1.90476200 | 2.19983400  |
| C        | 3.51895100  | -0.80805100 | 0.41941400  | C  | -2.26008200 | -2.98418100 | 0.44521900  |
| C        | 4.66547900  | -0.02093200 | 0.50231600  | C  | -3.15896500 | -4.02492900 | 0.21290900  |
| H        | 5.52461900  | 1.92779700  | 0.15231300  | C  | -2.88537800 | -4.97411900 | -0.77126600 |
| H        | 3.41326000  | 2.88817700  | -0.74407500 | H  | -4.06887600 | -4.07949400 | 0.80200800  |
| H        | 1.38438700  | 1.49825400  | -0.89938700 | C  | -0.85514800 | -3.78574600 | -1.22748700 |
| H        | 3.53127300  | -1.84947900 | 0.72432900  | C  | -1.70667700 | -4.84853100 | -1.50570700 |
| H        | 5.58803600  | -0.44794400 | 0.88671000  | H  | -3.57736400 | -5.78961500 | -0.96032400 |
| C        | 1.11900800  | -1.17439200 | -0.11669500 | H  | 0.07223700  | -3.65366300 | -1.77359000 |
| O        | 1.23203000  | -2.40261000 | -0.11377800 | H  | -1.44305000 | -5.55749500 | -2.28397500 |
| N        | -0.09352100 | -0.56326300 | -0.16840300 | N  | -1.11079200 | -2.86196400 | -0.27081800 |
| H        | -0.20458600 | 0.42900200  | 0.00734300  | Ni | 0.15407800  | -1.43677400 | -0.08045900 |
| C        | -1.32412300 | -1.32357800 | -0.17195900 | P  | 1.64888100  | 0.04952300  | 0.05256500  |
| H        | -1.32222000 | -2.05622100 | 0.64772800  | C  | 1.49649700  | 1.44545000  | -1.16405600 |
| H        | -1.40796400 | -1.90951100 | -1.09734300 | C  | 1.03013000  | 1.13258400  | -2.45295100 |
| C        | -2.52311200 | -0.40192200 | -0.03937900 | C  | 1.80469100  | 2.78143700  | -0.86653500 |
| C        | -3.82367300 | -0.92041200 | -0.08854700 | C  | 0.89025300  | 2.12581100  | -3.42281500 |
| C        | -4.89894900 | -0.04846500 | 0.04475600  | H  | 0.76926500  | 0.10322900  | -2.68803500 |
| H        | -3.98076800 | -1.98640800 | -0.22917100 | C  | 1.65479800  | 3.77802100  | -1.83521900 |
| C        | -3.32279900 | 1.73759700  | 0.25797200  | H  | 2.15860200  | 3.05062100  | 0.12395400  |
| C        | -4.64772200 | 1.31430700  | 0.22278800  | C  | 1.20118400  | 3.45363100  | -3.11506800 |
| H        | -5.91804600 | -0.42381400 | 0.01022100  | H  | 0.53259200  | 1.86412100  | -4.41543500 |
| H        | -3.07841700 | 2.78940200  | 0.39374100  | H  | 1.89448700  | 4.80888400  | -1.58682700 |
| H        | -5.45672400 | 2.03017000  | 0.33019700  | H  | 1.08737200  | 4.22987200  | -3.86739600 |
| N        | -2.28021700 | 0.90379700  | 0.13048800  | C  | 3.35867400  | -0.59986100 | -0.27440300 |
| <b>3</b> |             |             |             | C  | 3.66306400  | -1.88680500 | 0.20164000  |
| O 1      |             |             |             | C  | 4.34607900  | 0.10901700  | -0.97552000 |
| C        | -4.23406400 | 3.79372000  | -1.16570000 | C  | 4.92507900  | -2.44438300 | -0.00467500 |
| C        | -3.10107500 | 3.00674200  | -1.38261700 | H  | 2.89884100  | -2.45165200 | 0.73031600  |
| C        | -2.97382000 | 1.76939900  | -0.74949500 | C  | 5.60723100  | -0.45399600 | -1.19044000 |
| C        | -3.98332300 | 1.30589400  | 0.10784700  | H  | 4.13355100  | 1.10180500  | -1.36038000 |
|          |             |             |             | C  | 5.90067400  | -1.72919300 | -0.70432100 |
|          |             |             |             | H  | 5.14392500  | -3.43998600 | 0.37291000  |

|            |             |             |             |          |             |             |             |
|------------|-------------|-------------|-------------|----------|-------------|-------------|-------------|
| H          | 6.35988300  | 0.10662700  | -1.73920500 | N        | -0.75524600 | 2.61767100  | -0.42099300 |
| H          | 6.88136700  | -2.16612400 | -0.87380600 | H        | -2.02293600 | -0.90585200 | -1.10394600 |
| C          | 1.84334800  | 0.92691100  | 1.67771100  | P        | 1.23388400  | -0.40145200 | 0.09270600  |
| C          | 0.68165700  | 1.20256600  | 2.41828300  | C        | 2.27532500  | -0.00751500 | -1.39431700 |
| C          | 3.08396600  | 1.32059100  | 2.20328000  | C        | 1.62197200  | 0.08445300  | -2.63579900 |
| C          | 0.75535300  | 1.86640500  | 3.64331900  | C        | 3.65866400  | 0.22149500  | -1.34487100 |
| H          | -0.28552200 | 0.88869000  | 2.03457000  | C        | 2.33442100  | 0.38160500  | -3.79859200 |
| C          | 3.15857000  | 1.97755200  | 3.43420100  | H        | 0.54717300  | -0.07355000 | -2.68924800 |
| H          | 3.99759100  | 1.11146600  | 1.65516300  | C        | 4.37042100  | 0.52918500  | -2.50789500 |
| C          | 1.99571400  | 2.25472600  | 4.15537900  | H        | 4.18559300  | 0.16230600  | -0.39724200 |
| H          | -0.15501000 | 2.07261500  | 4.20022400  | C        | 3.71214600  | 0.60666200  | -3.73648700 |
| H          | 4.12797700  | 2.27225000  | 3.82825900  | H        | 1.81289500  | 0.44328300  | -4.75032800 |
| H          | 2.05581500  | 2.76469300  | 5.11336400  | H        | 5.44137700  | 0.70709700  | -2.45138500 |
| H          | -2.09019600 | 1.17007800  | -0.95192500 | H        | 4.26784000  | 0.84486800  | -4.63967400 |
| H          | -1.88503400 | -0.21854200 | 0.47541400  | C        | 1.26007100  | -2.25724500 | 0.12146500  |
|            |             |             |             | C        | 0.27702600  | -2.92164600 | 0.87221900  |
| <b>TS1</b> |             |             |             | C        | 2.22065800  | -3.02280000 | -0.55913100 |
| 0 1        |             |             |             | C        | 0.26236900  | -4.31461300 | 0.95390000  |
| Ni         | -0.65824500 | 0.61696300  | 0.14601200  | H        | -0.48513400 | -2.33942200 | 1.38265600  |
| C          | -4.23881900 | -3.49201600 | -1.06763100 | C        | 2.19903000  | -4.41774600 | -0.48518400 |
| C          | -3.10170700 | -2.75160000 | -1.39442700 | H        | 2.98772800  | -2.53393100 | -1.15171800 |
| C          | -2.90481500 | -1.48519300 | -0.83847300 | C        | 1.22257900  | -5.06662700 | 0.27326600  |
| C          | -3.84486700 | -0.94502700 | 0.05035000  | H        | -0.50705300 | -4.81087600 | 1.53947700  |
| C          | -4.99550600 | -1.68948000 | 0.35571100  | H        | 2.94676800  | -4.99608400 | -1.02207000 |
| C          | -5.18708400 | -2.95663400 | -0.18979200 | H        | 1.20606800  | -6.15209200 | 0.32791300  |
| H          | -4.39049100 | -4.47791000 | -1.50013300 | C        | 2.33297000  | 0.06086700  | 1.51307800  |
| H          | -2.36623900 | -3.15630800 | -2.08483900 | C        | 2.30636200  | 1.39600800  | 1.95156000  |
| H          | -5.73134200 | -1.25243900 | 1.02294200  | C        | 3.17201300  | -0.84847500 | 2.17405500  |
| H          | -6.07768900 | -3.52620800 | 0.06355500  | C        | 3.10844000  | 1.81397300  | 3.01352900  |
| C          | -3.72680500 | 0.42387000  | 0.66152000  | H        | 1.64850900  | 2.10706000  | 1.45866300  |
| O          | -4.75033200 | 1.03659100  | 0.99596600  | C        | 3.96838900  | -0.43065400 | 3.24386600  |
| N          | -2.46253300 | 0.93622400  | 0.82981000  | H        | 3.20398100  | -1.88702600 | 1.86011300  |
| C          | -2.36447400 | 2.29388400  | 1.37198500  | C        | 3.94087800  | 0.89980300  | 3.66451900  |
| H          | -3.36337100 | 2.66011200  | 1.62252600  | H        | 3.07717500  | 2.85108400  | 3.33756200  |
| H          | -1.77058800 | 2.27452000  | 2.29758100  | H        | 4.60971300  | -1.14902600 | 3.74820100  |
| C          | -1.67919200 | 3.20688700  | 0.37141500  | H        | 4.55993500  | 1.22178900  | 4.49776200  |
| C          | -1.95361200 | 4.57232000  | 0.28510400  | H        | -1.56847400 | -0.03171700 | 1.21141700  |
| C          | -1.26067600 | 5.34823000  | -0.64359400 |          |             |             |             |
| H          | -2.70456100 | 5.01368500  | 0.93342000  | <b>4</b> |             |             |             |
| C          | -0.08975000 | 3.36937700  | -1.31429700 | 0 1      |             |             |             |
| C          | -0.31002000 | 4.73606100  | -1.46098600 | C        | -5.07742100 | -2.26734200 | 0.92237800  |
| H          | -1.46503300 | 6.41168600  | -0.73179600 | C        | -4.14385600 | -1.55535300 | 1.67961500  |
| H          | 0.64145100  | 2.84744500  | -1.92438300 | C        | -3.58445100 | -0.37849800 | 1.17835600  |
| H          | 0.24798100  | 5.29986100  | -2.20177800 | C        | -3.95738800 | 0.10887100  | -0.08229200 |

|    |             |             |             |           |             |             |             |
|----|-------------|-------------|-------------|-----------|-------------|-------------|-------------|
| C  | -4.91874500 | -0.59622800 | -0.81993000 | H         | 5.71332400  | 0.01260900  | 1.65919500  |
| C  | -5.46373900 | -1.78342300 | -0.33063200 | H         | 6.41904500  | 1.37541500  | -0.29818500 |
| H  | -5.50764200 | -3.18763200 | 1.31008700  | C         | 1.02046200  | -1.83744500 | -1.51118900 |
| H  | -3.84994200 | -1.91572800 | 2.66257100  | C         | -0.16734400 | -2.06122800 | -2.22524300 |
| H  | -5.23515300 | -0.19293000 | -1.77707400 | C         | 2.18190000  | -2.53073600 | -1.89736000 |
| H  | -6.19707000 | -2.32683200 | -0.92177600 | C         | -0.19312500 | -2.95935900 | -3.29430300 |
| C  | -3.45450200 | 1.41985500  | -0.64001900 | H         | -1.07068500 | -1.52954000 | -1.94592700 |
| O  | -4.24276600 | 2.11217200  | -1.31199400 | C         | 2.15159900  | -3.42957400 | -2.96412900 |
| N  | -2.19086000 | 1.81462700  | -0.33680700 | H         | 3.11601900  | -2.36602200 | -1.36961000 |
| C  | -1.91335900 | 3.18164300  | -0.76751200 | C         | 0.96322300  | -3.64677200 | -3.66515800 |
| H  | -2.71151400 | 3.86820400  | -0.45557200 | H         | -1.12114000 | -3.11649400 | -3.83727800 |
| H  | -1.87889300 | 3.26528600  | -1.86787400 | H         | 3.05814700  | -3.95782500 | -3.24767700 |
| C  | -0.59860200 | 3.63272700  | -0.19859500 | H         | 0.94127200  | -4.34379700 | -4.49878900 |
| C  | -0.25920500 | 4.98145400  | -0.05662900 | H         | -2.86076900 | 0.17467300  | 1.76761400  |
| C  | 0.96573600  | 5.32398100  | 0.50562100  | H         | -1.28281100 | -0.41053200 | -0.28220600 |
| H  | 0.96284900  | 5.74385700  | -0.37638300 |           |             |             |             |
| C  | 1.42845600  | 2.98629100  | 0.73940700  | <b>4r</b> |             |             |             |
| C  | 1.82484300  | 4.30457900  | 0.92135800  | C         | -5.25070400 | -1.58496900 | -0.35359400 |
| H  | 1.24228000  | 6.36722400  | 0.63007000  | C         | -4.02756900 | -1.57895100 | 0.31918200  |
| H  | 2.06789000  | 2.16602700  | 1.04127800  | C         | -3.27336800 | -0.40456900 | 0.39447400  |
| H  | 2.78456700  | 4.52137100  | 1.37870500  | C         | -3.74295000 | 0.78091000  | -0.18325200 |
| N  | 0.24747900  | 2.64955000  | 0.18353200  | C         | -4.98795200 | 0.77220900  | -0.82962100 |
| Ni | -0.56471700 | 0.84760100  | -0.09695400 | C         | -5.72833400 | -0.40413800 | -0.93077400 |
| P  | 1.04665400  | -0.66262200 | -0.08198300 | H         | -5.83421300 | -2.50004200 | -0.41902900 |
| C  | 0.95423500  | -1.71058300 | 1.43259100  | H         | -3.65778900 | -2.48782600 | 0.78722900  |
| C  | 0.49626600  | -1.10582100 | 2.61465700  | H         | -5.36708500 | 1.70248600  | -1.24101100 |
| C  | 1.32214600  | -3.06394300 | 1.45966600  | H         | -6.68410900 | -0.39922800 | -1.44902800 |
| C  | 0.42117800  | -1.83491600 | 3.80209200  | C         | -3.03116800 | 2.10059500  | -0.03081200 |
| H  | 0.18897100  | -0.06289000 | 2.60081700  | O         | -3.72225400 | 3.11587800  | 0.16987300  |
| C  | 1.23863900  | -3.79373300 | 2.64725700  | N         | -1.66986400 | 2.11920700  | -0.09167800 |
| H  | 1.66526900  | -3.55560700 | 0.55486000  | C         | -1.13864200 | 3.44216500  | 0.21778500  |
| C  | 0.79092500  | -3.18159900 | 3.81969000  | H         | -1.29828500 | 3.70049300  | 1.27742000  |
| H  | 0.06348600  | -1.35380100 | 4.70850800  | H         | -1.68615900 | 4.21981400  | -0.33650700 |
| H  | 1.51992900  | -4.84349500 | 2.65316500  | C         | 0.32534300  | 3.57363000  | -0.10183800 |
| H  | 0.72378300  | -3.75299900 | 4.74166900  | C         | 1.04330800  | 4.73202300  | 0.22502300  |
| C  | 2.80118600  | -0.06807300 | -0.11600600 | C         | 2.37988500  | 4.83222600  | -0.13927700 |
| C  | 3.20815300  | 0.71059400  | -1.21467800 | H         | 0.54279200  | 5.53951100  | 0.75112100  |
| C  | 3.71731100  | -0.30943400 | 0.91778800  | C         | 2.21107800  | 2.65050000  | -1.10700400 |
| C  | 4.50331900  | 1.22142200  | -1.28241100 | C         | 2.97896600  | 3.77069900  | -0.82544700 |
| H  | 2.50881200  | 0.91727600  | -2.02113300 | H         | 2.94981000  | 5.72510000  | 0.10238700  |
| C  | 5.01414100  | 0.21084200  | 0.85104800  | H         | 2.62913800  | 1.79708300  | -1.62987400 |
| H  | 3.42628500  | -0.90629700 | 1.77640200  | H         | 4.01869000  | 3.80781600  | -1.13295300 |
| C  | 5.41043700  | 0.97414800  | -0.24726200 | N         | 0.91533700  | 2.55071900  | -0.74708400 |
| H  | 4.80291900  | 1.81627000  | -2.14117400 | Ni        | -0.42683600 | 0.96991300  | -1.15147800 |

|     |             |             |             |    |             |             |             |
|-----|-------------|-------------|-------------|----|-------------|-------------|-------------|
| P   | 0.79151800  | -0.93295800 | -0.02750200 | C  | 5.19965800  | 0.45629700  | 1.77493600  |
| C   | 0.64043600  | -0.99348500 | 1.81071400  | H  | 5.82600800  | -1.52838900 | 2.35016200  |
| C   | 0.10919100  | 0.13062700  | 2.46335900  | H  | 4.31308100  | -2.65856800 | 0.73129600  |
| C   | 1.02913800  | -2.10587400 | 2.57647800  | H  | 4.41344700  | 2.29551200  | 0.95898800  |
| C   | -0.01980900 | 0.14702900  | 3.85453300  | H  | 5.86953100  | 0.95699400  | 2.46966000  |
| H   | -0.22742700 | 0.98175400  | 1.87855500  | C  | 2.67993200  | 1.44697900  | -0.88047900 |
| C   | 0.89739600  | -2.08654100 | 3.96479100  | O  | 3.22796000  | 2.44446100  | -1.37849300 |
| H   | 1.42667700  | -2.99190000 | 2.09166900  | N  | 1.40786000  | 1.06720700  | -1.20139200 |
| C   | 0.37461000  | -0.95983500 | 4.60637600  | C  | 0.85691900  | 1.86565800  | -2.29752600 |
| H   | -0.43939300 | 1.02101000  | 4.34523200  | H  | 1.52463800  | 1.84585900  | -3.16970500 |
| H   | 1.19788700  | -2.95440500 | 4.54591200  | H  | 0.78329500  | 2.93031200  | -2.02088500 |
| H   | 0.26832700  | -0.95039700 | 5.68787400  | C  | -0.50637500 | 1.37060400  | -2.68270900 |
| C   | 2.60264900  | -0.78970400 | -0.35252400 | C  | -1.13784400 | 1.73629300  | -3.87653800 |
| C   | 3.05798500  | -0.98729500 | -1.66975200 | C  | -2.41567000 | 1.25805400  | -4.14413500 |
| C   | 3.52194700  | -0.39313500 | 0.62944200  | H  | -0.62315600 | 2.38573900  | -4.57803900 |
| C   | 4.40370200  | -0.80556400 | -1.98915400 | C  | -2.35047200 | 0.10299000  | -2.04922100 |
| H   | 2.36215500  | -1.29545800 | -2.44602000 | C  | -3.03796100 | 0.42295600  | -3.21142400 |
| C   | 4.86895500  | -0.20875500 | 0.30443300  | H  | -2.92128900 | 1.52741100  | -5.06713800 |
| H   | 3.19249800  | -0.23128300 | 1.65103600  | H  | -2.78576300 | -0.53762700 | -1.28952900 |
| C   | 5.31362600  | -0.41430100 | -1.00225300 | H  | -4.03367000 | 0.02664600  | -3.38094000 |
| H   | 4.74041300  | -0.97093700 | -3.00921900 | N  | -1.11317300 | 0.56337700  | -1.79061400 |
| H   | 5.56981800  | 0.09306200  | 1.07836300  | Ni | 0.07800100  | 0.20798300  | -0.18328200 |
| H   | 6.36184900  | -0.27340900 | -1.25186000 | H  | 2.81577000  | -1.30850700 | -0.71938200 |
| C   | 0.39688400  | -2.63391300 | -0.61673300 | H  | 1.03004500  | 0.07972100  | 0.90654500  |
| C   | -0.87823900 | -2.88141200 | -1.14690900 | C  | -1.16446000 | -1.18453900 | 0.76335400  |
| C   | 1.32117100  | -3.69077500 | -0.53748100 | C  | -1.42454100 | -0.04707400 | 1.19799800  |
| C   | -1.22982800 | -4.16627500 | -1.56727200 | C  | -1.12354500 | -2.59403300 | 0.49234600  |
| H   | -1.58717300 | -2.06675700 | -1.24776500 | C  | 0.08708200  | -3.25129600 | 0.19967700  |
| C   | 0.96668300  | -4.97164700 | -0.96225600 | C  | -2.31969300 | -3.34139300 | 0.53116700  |
| H   | 2.32292700  | -3.51333600 | -0.15758100 | C  | 0.09721300  | -4.62317200 | -0.04073500 |
| C   | -0.31122600 | -5.21266000 | -1.47363700 | H  | 1.00752400  | -2.67742200 | 0.17971700  |
| H   | -2.22076700 | -4.34182700 | -1.97711000 | C  | -2.29763000 | -4.71190200 | 0.28657200  |
| H   | 1.69096300  | -5.77953200 | -0.89769000 | H  | -3.25600400 | -2.83955200 | 0.75757300  |
| H   | -0.58487100 | -6.21055000 | -1.80628200 | C  | -1.09146300 | -5.35708900 | -0.00110000 |
| H   | -2.32920700 | -0.40054500 | 0.92887600  | H  | 1.03743200  | -5.12188100 | -0.25942500 |
| H   | -1.15811400 | 0.04671200  | -2.23949700 | H  | -3.22471600 | -5.27769000 | 0.32106900  |
|     |             |             |             | H  | -1.07834700 | -6.42643500 | -0.19280300 |
| 5   |             |             |             | C  | -1.98970700 | 1.04267000  | 1.94597300  |
| 0 1 |             |             |             | C  | -1.29347200 | 2.25297800  | 2.12674800  |
| C   | 5.17545500  | -0.93954100 | 1.70835300  | C  | -3.26951100 | 0.89288400  | 2.52052700  |
| C   | 4.32106000  | -1.57357800 | 0.80326100  | C  | -1.86386200 | 3.28339000  | 2.87097400  |
| C   | 3.47695200  | -0.81716700 | -0.01226500 | H  | -0.30744000 | 2.36746400  | 1.68726100  |
| C   | 3.48776300  | 0.58299000  | 0.05578000  | C  | -3.83087700 | 1.93041700  | 3.25938900  |
| C   | 4.37555300  | 1.21053800  | 0.93999600  | H  | -3.80997000 | -0.03940500 | 2.38490500  |

|            |             |             |             |          |             |             |             |
|------------|-------------|-------------|-------------|----------|-------------|-------------|-------------|
| C          | -3.13146700 | 3.12786000  | 3.43764700  | H        | -3.05557900 | 2.96647000  | -0.48261800 |
| H          | -1.31522300 | 4.21100800  | 3.00879900  | C        | -4.79653900 | 1.98272600  | 2.27531400  |
| H          | -4.81640900 | 1.80368900  | 3.69932700  | H        | -4.16618800 | 0.44245600  | 3.64990900  |
| H          | -3.57351000 | 3.93518000  | 4.01503100  | H        | -5.15432500 | 3.45677200  | 0.73973000  |
| <b>TS2</b> |             |             |             | H        | -5.71731400 | 2.19774400  | 2.81062400  |
| 0 1        |             |             |             | C        | 0.71605500  | 2.45787800  | -1.11794700 |
| C          | 4.49892000  | 0.14840700  | 2.74453600  | C        | 1.95134300  | 2.11266200  | -1.69118400 |
| C          | 3.14282700  | -0.09329600 | 2.97523600  | C        | 0.27241100  | 3.79413900  | -1.20422500 |
| C          | 2.40044700  | -0.85140800 | 2.06700300  | C        | 2.72712700  | 3.08023400  | -2.32750700 |
| C          | 3.00640000  | -1.38520200 | 0.91972400  | H        | 2.29652500  | 1.08531600  | -1.63235900 |
| C          | 4.37593900  | -1.16270700 | 0.71527300  | C        | 1.05253900  | 4.75422400  | -1.84160300 |
| C          | 5.11416700  | -0.38985600 | 1.61047900  | H        | -0.67960200 | 4.06898300  | -0.75985100 |
| H          | 5.07526200  | 0.74351100  | 3.44849500  | C        | 2.28263300  | 4.40172400  | -2.40595000 |
| H          | 2.66221400  | 0.30502900  | 3.86545600  | H        | 3.68155400  | 2.79861900  | -2.76360500 |
| H          | 4.84925900  | -1.61224700 | -0.15206900 | H        | 0.70167800  | 5.78133100  | -1.89530100 |
| H          | 6.17161900  | -0.21375100 | 1.42921400  | H        | 2.88901000  | 5.15321400  | -2.90417400 |
| C          | 2.28213000  | -2.27863700 | -0.05896000 | <b>6</b> |             |             |             |
| O          | 2.91102300  | -3.21719000 | -0.57966100 | 0 1      |             |             |             |
| N          | 0.96068300  | -2.05315300 | -0.29183200 | Ni       | 1.05225000  | -0.14283500 | -0.04985600 |
| C          | 0.34414700  | -3.09155500 | -1.10418000 | C        | 0.87506400  | 4.29322400  | 0.65831400  |
| H          | 0.60989800  | -4.09145600 | -0.73556300 | C        | 0.54804500  | 3.22126700  | -0.16972100 |
| H          | 0.70710600  | -3.06809100 | -2.14614000 | C        | 1.45972900  | 2.17020200  | -0.33809600 |
| C          | -1.14793400 | -2.92410600 | -1.11321500 | C        | 2.69982700  | 2.18169100  | 0.33214500  |
| C          | -2.00327200 | -3.92514100 | -1.58538100 | C        | 3.02210900  | 3.27088700  | 1.14677300  |
| C          | -3.37448000 | -3.70201500 | -1.60495400 | C        | 2.11534000  | 4.31796200  | 1.30862100  |
| H          | -1.58200300 | -4.86418900 | -1.93102800 | H        | 0.17510100  | 5.11375700  | 0.78865300  |
| C          | -2.95641700 | -1.52632000 | -0.69640200 | H        | -0.39441100 | 3.20518800  | -0.70759500 |
| C          | -3.86191400 | -2.47363500 | -1.15260800 | H        | 3.98281300  | 3.27077200  | 1.65217600  |
| H          | -4.05314300 | -4.46991500 | -1.96524000 | H        | 2.37206800  | 5.15967700  | 1.94676700  |
| H          | -3.29365100 | -0.56228200 | -0.33893500 | C        | 3.62688400  | 0.99338500  | 0.26044200  |
| H          | -4.92326000 | -2.24838500 | -1.15232300 | O        | 4.83084300  | 1.07859500  | 0.54393300  |
| N          | -1.62561300 | -1.74167700 | -0.66690000 | N        | 2.95132300  | -0.12286400 | -0.07168000 |
| Ni         | -0.11577200 | -0.49476100 | -0.17177800 | C        | 3.61881100  | -1.39786900 | 0.01277300  |
| H          | 1.34950900  | -1.04744900 | 2.25533400  | H        | 4.21839000  | -1.61820400 | -0.88615100 |
| H          | 1.10836100  | 0.26836100  | 0.02298600  | H        | 4.32713400  | -1.42911200 | 0.85514500  |
| C          | -1.16928000 | 1.17594300  | 0.20215300  | C        | 2.57048500  | -2.46626500 | 0.18224100  |
| C          | -0.13317300 | 1.49346400  | -0.45028500 | C        | 2.89502100  | -3.81970800 | 0.30157500  |
| C          | -2.40894500 | 1.43110100  | 0.89445000  | C        | 1.88626000  | -4.75964900 | 0.47635800  |
| C          | -2.74502500 | 0.71647900  | 2.06204600  | H        | 3.93852100  | -4.11669200 | 0.26139600  |
| C          | -3.29843300 | 2.42044400  | 0.42434000  | C        | 0.29780900  | -2.96713400 | 0.39563400  |
| C          | -3.92563700 | 0.99623500  | 2.74644800  | C        | 0.56107300  | -4.32287000 | 0.52733300  |
| H          | -2.06770800 | -0.05080300 | 2.42524200  | H        | 2.12758300  | -5.81411700 | 0.57450400  |
| C          | -4.47958600 | 2.69078500  | 1.11247100  | H        | -0.70942000 | -2.57395700 | 0.43024700  |

|            |             |             |             |          |             |             |             |
|------------|-------------|-------------|-------------|----------|-------------|-------------|-------------|
| H          | -0.26132200 | -5.01652900 | 0.66619100  | N        | 2.84012700  | 0.76994200  | -0.20774500 |
| N          | 1.27707700  | -2.05238800 | 0.22258000  | C        | 3.16902000  | 2.16931500  | -0.11585400 |
| H          | 1.28303700  | 1.45984400  | -1.16448600 | H        | 3.93065700  | 2.37150000  | 0.65506100  |
| C          | -0.87005800 | -0.08512800 | -0.09151300 | H        | 3.58933200  | 2.55823300  | -1.05723000 |
| C          | -1.56260500 | -0.13596500 | 1.06886800  | C        | 1.90329600  | 2.91306500  | 0.22448000  |
| C          | -1.41942600 | 0.13700900  | -1.44783600 | C        | 1.86670400  | 4.29485000  | 0.42575800  |
| C          | -1.05273000 | -0.69979800 | -2.52322300 | C        | 0.65855500  | 4.91345000  | 0.72701500  |
| C          | -2.23982600 | 1.24926200  | -1.73945500 | H        | 2.78524000  | 4.86735700  | 0.34102100  |
| C          | -1.50277800 | -0.45217900 | -3.82054600 | C        | -0.39292900 | 2.76487800  | 0.61052800  |
| H          | -0.41253500 | -1.55734500 | -2.33228600 | C        | -0.49599000 | 4.13255700  | 0.82073900  |
| C          | -2.67813300 | 1.50304300  | -3.03835200 | H        | 0.61499500  | 5.98715700  | 0.88527700  |
| H          | -2.53591300 | 1.91076900  | -0.93043900 | H        | -1.25780500 | 2.11556500  | 0.66467600  |
| C          | -2.31369200 | 0.65347200  | -4.08712600 | H        | -1.46097100 | 4.57133700  | 1.05122000  |
| H          | -1.21121900 | -1.12089700 | -4.62684400 | N        | 0.77836100  | 2.16124100  | 0.32221000  |
| H          | -3.30692400 | 2.36858800  | -3.23301500 | H        | 0.44597700  | -1.10826900 | -0.42568000 |
| H          | -2.65438800 | 0.85353400  | -5.09946000 | C        | -0.82177500 | -0.42533800 | -0.01946100 |
| C          | -3.01949200 | -0.14237700 | 1.33846400  | C        | -1.51993400 | -0.13851400 | -1.14725400 |
| C          | -3.46995300 | 0.28775100  | 2.60218400  | C        | -1.35015400 | -0.94782000 | 1.26499900  |
| C          | -3.98544300 | -0.60622700 | 0.42373200  | C        | -0.89003800 | -0.43849000 | 2.49462800  |
| C          | -4.82494500 | 0.28436400  | 2.93083100  | C        | -2.25178900 | -2.03217700 | 1.29956700  |
| H          | -2.74047400 | 0.63433000  | 3.33143100  | C        | -1.33972600 | -0.96357400 | 3.70724000  |
| C          | -5.33974800 | -0.61566400 | 0.75393900  | H        | -0.17164700 | 0.37700900  | 2.49612300  |
| H          | -3.67086100 | -0.97248700 | -0.54743800 | C        | -2.69262600 | -2.56305900 | 2.51037800  |
| C          | -5.76959700 | -0.16564200 | 2.00573500  | H        | -2.60507300 | -2.45733000 | 0.36466100  |
| H          | -5.14238300 | 0.62907100  | 3.91200200  | C        | -2.24194000 | -2.02867900 | 3.72122900  |
| H          | -6.06359000 | -0.98319600 | 0.03047300  | H        | -0.97372100 | -0.54622000 | 4.64184500  |
| H          | -6.82645200 | -0.17459300 | 2.25929100  | H        | -3.38614500 | -3.40029300 | 2.50877200  |
| H          | -0.97148300 | -0.19327000 | 1.98706300  | H        | -2.58474400 | -2.44460700 | 4.66485700  |
| <b>TS3</b> |             |             |             | C        | -2.96525400 | -0.02380600 | -1.42204600 |
| 0 1        |             |             |             | C        | -3.38046000 | -0.06121200 | -2.76820000 |
| Ni         | 1.07410000  | 0.25207300  | -0.01013400 | C        | -3.95145300 | 0.17560500  | -0.43486900 |
| C          | 2.09172300  | -4.09324500 | -0.57624800 | C        | -4.72443600 | 0.06090200  | -3.11618400 |
| C          | 1.26174000  | -2.99694600 | -0.31042900 | H        | -2.63264600 | -0.19393400 | -3.54679300 |
| C          | 1.73824500  | -1.68250200 | -0.42074200 | C        | -5.29379900 | 0.30769700  | -0.78383600 |
| C          | 3.09604600  | -1.49371400 | -0.77440900 | H        | -3.66559300 | 0.23407200  | 0.60923900  |
| C          | 3.91422500  | -2.59020500 | -1.04401100 | C        | -5.68928700 | 0.24375900  | -2.12346000 |
| C          | 3.41642800  | -3.89159700 | -0.95761600 | H        | -5.01676700 | 0.01871700  | -4.16219100 |
| H          | 1.69295600  | -5.10059400 | -0.48659100 | H        | -6.03593400 | 0.46359900  | -0.00501700 |
| H          | 0.22977800  | -3.18160500 | -0.02264000 | H        | -6.73806000 | 0.34365000  | -2.39013100 |
| H          | 4.95149200  | -2.39415100 | -1.30205300 | H        | -0.91491000 | 0.07712800  | -2.03038700 |
| H          | 4.06166600  | -4.73951500 | -1.17220600 | <b>7</b> |             |             |             |
| C          | 3.70419400  | -0.11497400 | -0.74523700 | 0 1      |             |             |             |
| O          | 4.85327500  | 0.13293700  | -1.13494600 | Ni       | -0.05169900 | -0.82305900 | -0.00004600 |

|          |             |             |             |            |             |             |             |
|----------|-------------|-------------|-------------|------------|-------------|-------------|-------------|
| C        | 4.14689100  | -1.49543900 | 0.00008700  | C          | 1.09650500  | 0.68681800  | -0.94015000 |
| C        | 2.77196900  | -1.78559800 | 0.00008500  | C          | 0.92689200  | -0.52162200 | -1.17768000 |
| C        | 1.83808800  | -0.74533200 | -0.00000600 | C          | 1.54207900  | 2.05391900  | -0.94494600 |
| C        | 2.31115300  | 0.58004700  | -0.00005300 | C          | 2.73561000  | 2.38332800  | -1.62281300 |
| C        | 3.67155700  | 0.87803400  | -0.00006400 | C          | 0.82411000  | 3.07188200  | -0.28830800 |
| C        | 4.59576700  | -0.17248800 | 0.00000300  | C          | 3.19350200  | 3.69722400  | -1.63816900 |
| H        | 4.86915200  | -2.30951600 | 0.00015200  | H          | 3.29288300  | 1.60433800  | -2.13325800 |
| H        | 2.45605700  | -2.82903000 | 0.00015500  | C          | 1.29098300  | 4.38445800  | -0.31291500 |
| H        | 3.99586100  | 1.91595600  | -0.00010500 | H          | -0.10034800 | 2.82196800  | 0.22302000  |
| H        | 5.66219000  | 0.03919700  | -0.00002200 | C          | 2.47510600  | 4.70146300  | -0.98290900 |
| C        | 1.22686200  | 1.61340600  | -0.00001200 | H          | 4.11293900  | 3.93930400  | -2.16413800 |
| O        | 1.37768800  | 2.83849300  | -0.00005100 | H          | 0.72630300  | 5.16315000  | 0.19181200  |
| N        | 0.01390500  | 0.98993000  | 0.00011300  | H          | 2.83571200  | 5.72619600  | -1.00018100 |
| C        | -1.23888700 | 1.70898700  | 0.00006000  | C          | 0.99044800  | -1.86330900 | -1.68981700 |
| H        | -1.33274300 | 2.36568600  | 0.87959900  | C          | -0.05939800 | -2.78164100 | -1.49362500 |
| H        | -1.33266500 | 2.36571600  | -0.87946300 | C          | 2.12978300  | -2.26955900 | -2.41519200 |
| C        | -2.36932700 | 0.70874600  | 0.00002300  | C          | 0.02904400  | -4.06967800 | -2.01655000 |
| C        | -3.71457700 | 1.08539200  | 0.00005000  | H          | -0.93926400 | -2.47173400 | -0.94004600 |
| C        | -4.69963600 | 0.10345700  | 0.00002300  | C          | 2.20999500  | -3.56106800 | -2.92920200 |
| H        | -3.97448700 | 2.13937400  | 0.00009100  | H          | 2.94453200  | -1.56821500 | -2.57073800 |
| C        | -2.96823700 | -1.54748000 | -0.00005600 | C          | 1.16077300  | -4.46457200 | -2.73350200 |
| C        | -4.32147000 | -1.24224800 | -0.00001200 | H          | -0.79209000 | -4.76457200 | -1.86564500 |
| H        | -5.74975900 | 0.38063100  | 0.00006100  | H          | 3.09036600  | -3.85981000 | -3.49169500 |
| H        | -2.62029800 | -2.57668400 | -0.00009900 | H          | 1.22526400  | -5.47029600 | -3.13999700 |
| H        | -5.05852800 | -2.03819200 | -0.00001900 | H          | -1.72023900 | -1.40580600 | 3.41972500  |
| N        | -2.01242600 | -0.59740700 | -0.00003100 | C          | 0.25477200  | -0.65513400 | 3.10061200  |
| <b>8</b> |             |             |             | C          | 0.94995400  | -0.99549600 | 4.26578300  |
| 0 1      |             |             |             | C          | 2.23316900  | -0.65909900 | 1.87699900  |
| Ni       | -0.37278100 | -0.01115800 | 0.38721000  | C          | 2.32954000  | -1.16355600 | 4.21452000  |
| C        | -3.16504000 | 0.99662500  | -2.70938000 | H          | 0.40288000  | -1.12537300 | 5.19447000  |
| C        | -1.93371100 | 0.72481400  | -2.09084500 | C          | 2.98712900  | -0.99529000 | 2.99228200  |
| C        | -1.88160300 | 0.41794400  | -0.72792600 | H          | 2.69492500  | -0.51735200 | 0.90594400  |
| C        | -3.09035400 | 0.40730800  | -0.00639100 | H          | 2.88657100  | -1.42360200 | 5.10998400  |
| C        | -4.31651200 | 0.66988400  | -0.61299200 | H          | 4.06160500  | -1.11680500 | 2.90487600  |
| C        | -4.35470700 | 0.96334600  | -1.97895500 | N          | 0.89714600  | -0.49013700 | 1.92214300  |
| H        | -3.19019400 | 1.23083700  | -3.77189900 | H          | -1.53419400 | 0.29220400  | 3.80571800  |
| H        | -1.03001000 | 0.75598200  | -2.69277700 | <b>TS4</b> |             |             |             |
| H        | -5.22247000 | 0.64210800  | -0.01172800 | 0 1        |             |             |             |
| H        | -5.30290600 | 1.17077600  | -2.46903700 | Ni         | 0.41806800  | 0.72256000  | -0.29233500 |
| C        | -2.95054900 | 0.09488400  | 1.44945300  | C          | -3.11111700 | 0.60441300  | -2.77564500 |
| O        | -3.87640600 | 0.04224000  | 2.26760100  | C          | -1.97630000 | 0.09313300  | -2.13151600 |
| N        | -1.64019500 | -0.12662800 | 1.72932400  | C          | -1.43792400 | 0.74171000  | -1.01180400 |
| C        | -1.23948700 | -0.47577600 | 3.07139200  | C          | -2.01622100 | 1.96998900  | -0.59739200 |

|   |             |             |             |     |             |             |             |
|---|-------------|-------------|-------------|-----|-------------|-------------|-------------|
| C | -3.15742800 | 2.45491100  | -1.22884100 | H   | 5.54526800  | 0.53418300  | -0.38315400 |
| C | -3.72431000 | 1.76380100  | -2.30468300 | N   | 2.28490800  | 1.27428600  | 0.03137500  |
| H | -3.52122100 | 0.07723100  | -3.63325700 |     |             |             |             |
| H | -1.54508700 | -0.83956600 | -2.48009600 | 9   |             |             |             |
| H | -3.55634600 | 3.40881700  | -0.89349700 | O 1 |             |             |             |
| H | -4.61840100 | 2.14736300  | -2.78914900 | Ni  | 1.20677300  | -0.15079100 | -0.00825300 |
| C | -1.22997600 | 2.87663500  | 0.32182600  | C   | -3.55205700 | 3.35355000  | -1.05584600 |
| O | -1.69620400 | 3.88634400  | 0.86759400  | C   | -3.24801200 | 2.04228100  | -0.71651900 |
| N | 0.04487000  | 2.45095700  | 0.34375500  | C   | -1.97859100 | 1.64370100  | -0.23312500 |
| C | 0.36605100  | -1.19932500 | -0.35432100 | C   | -0.99618800 | 2.65909500  | -0.04896100 |
| C | -0.81865800 | -0.82429800 | 0.02650000  | C   | -1.34169000 | 3.98571900  | -0.38075500 |
| C | 1.23283300  | -2.36427900 | -0.39001600 | C   | -2.58177500 | 4.34116000  | -0.89563300 |
| C | 1.07303200  | -3.34905000 | -1.38652000 | H   | -4.54036300 | 3.59787500  | -1.43722200 |
| C | 2.25821600  | -2.53643700 | 0.56202600  | H   | -4.01489900 | 1.28714000  | -0.83972200 |
| C | 1.90666100  | -4.46600400 | -1.42314200 | H   | -0.59778200 | 4.75272300  | -0.20027900 |
| H | 0.29386200  | -3.22741400 | -2.13392400 | H   | -2.78971500 | 5.37714400  | -1.15012300 |
| C | 3.08236900  | -3.66062400 | 0.52450300  | C   | 0.40205000  | 2.61008900  | 0.55618100  |
| H | 2.38928000  | -1.79031700 | 1.34035900  | O   | 0.71690700  | 3.55985600  | 1.29649100  |
| C | 2.91399000  | -4.62904500 | -0.46853900 | N   | 1.33174300  | 1.69883200  | 0.15422800  |
| H | 1.76621100  | -5.21339400 | -2.19982800 | C   | -0.60536500 | -0.42303400 | 0.04939100  |
| H | 3.85801100  | -3.78037800 | 1.27664700  | C   | -1.79985300 | 0.18644900  | -0.00032300 |
| H | 3.56093200  | -5.50144500 | -0.49865500 | C   | -0.18249400 | -1.82214300 | 0.01872300  |
| C | -1.96667200 | -1.32362800 | 0.78813300  | C   | -0.30786400 | -2.63219700 | -1.14695400 |
| C | -2.28382800 | -2.69235000 | 0.69834200  | C   | 0.65818100  | -2.29509700 | 1.06228500  |
| C | -2.72145200 | -0.50733600 | 1.64622300  | C   | 0.31783400  | -3.86495600 | -1.22771700 |
| C | -3.32590900 | -3.22678100 | 1.45385100  | H   | -0.91248100 | -2.26905500 | -1.97130200 |
| H | -1.70664800 | -3.33159000 | 0.03723500  | C   | 1.29901100  | -3.54271400 | 0.96213700  |
| C | -3.76077200 | -1.04882300 | 2.40100400  | H   | 0.72613800  | -1.72804400 | 1.98697100  |
| H | -2.49140300 | 0.55001800  | 1.72374400  | C   | 1.12686600  | -4.32534100 | -0.17215600 |
| C | -4.06945600 | -2.40809900 | 2.30738700  | H   | 0.18910900  | -4.47750200 | -2.11615000 |
| H | -3.55915600 | -4.28522600 | 1.37156300  | H   | 1.91484000  | -3.89481500 | 1.78513100  |
| H | -4.33189600 | -0.40391300 | 3.06343100  | H   | 1.61379500  | -5.29397500 | -0.24668200 |
| H | -4.88404400 | -2.82570900 | 2.89302300  | C   | -3.03763900 | -0.66165100 | 0.16627800  |
| C | 1.09808000  | 3.15719500  | 1.02471500  | C   | -3.59233600 | -1.38306300 | -0.90225600 |
| H | 1.15576000  | 4.21398900  | 0.72201800  | C   | -3.65031800 | -0.75636200 | 1.42579100  |
| H | 0.96466000  | 3.16592000  | 2.12076900  | C   | -4.71996600 | -2.18640400 | -0.71477900 |
| C | 2.39499800  | 2.45889600  | 0.68453600  | H   | -3.14637200 | -1.30219900 | -1.88987000 |
| C | 3.64719500  | 2.99048600  | 1.00011000  | C   | -4.77568800 | -1.56019300 | 1.61502600  |
| C | 4.79907000  | 2.30670300  | 0.62457900  | H   | -3.23710400 | -0.19579100 | 2.26034000  |
| H | 3.70485100  | 3.93838300  | 1.52641100  | C   | -5.31404800 | -2.27936200 | 0.54516100  |
| C | 3.40213800  | 0.61615300  | -0.33617500 | H   | -5.13483900 | -2.73677100 | -1.55566900 |
| C | 4.67530100  | 1.09798800  | -0.06351800 | H   | -5.23250100 | -1.62381000 | 2.59948500  |
| H | 5.77917900  | 2.71311800  | 0.85733100  | H   | -6.19104000 | -2.90442000 | 0.69207900  |
| H | 3.25201100  | -0.32481200 | -0.85199400 | C   | 2.68088100  | 2.06375600  | 0.60804500  |



|            |             |             |             |            |             |             |             |
|------------|-------------|-------------|-------------|------------|-------------|-------------|-------------|
| H          | 2.72219900  | 2.16248500  | 1.70455000  | H          | -2.53785800 | -1.19794800 | -2.01553400 |
| H          | 2.96473400  | 3.05124300  | 0.22115600  | C          | -5.54925800 | -0.91788600 | -0.45920400 |
| C          | 3.68013400  | 1.02917800  | 0.17989300  | H          | -5.93473300 | 0.34177000  | 1.25074400  |
| C          | 5.05496400  | 1.26744000  | 0.09842700  | H          | -4.84864400 | -2.05610200 | -2.15257800 |
| C          | 3.98694500  | -1.19492800 | -0.45206100 | H          | -6.56876500 | -1.28937800 | -0.52255700 |
| C          | 5.90381400  | 0.22821700  | -0.26904300 | C          | 0.99695600  | 1.66889200  | 1.10497800  |
| H          | 5.44213000  | 2.25696500  | 0.32012300  | O          | 1.86761800  | 2.12306600  | 1.86188900  |
| C          | 5.36157300  | -1.02951900 | -0.54958300 | N          | 0.99036200  | 0.31715600  | 0.75765900  |
| H          | 3.51075900  | -2.14852200 | -0.65697600 | Ni         | 1.15770400  | -0.05461200 | -1.07673300 |
| H          | 6.97483300  | 0.39500000  | -0.33995600 | C          | 2.09033900  | -0.48511200 | 1.31570800  |
| H          | 5.98962300  | -1.86463000 | -0.84141500 | C          | 3.34305500  | -0.38247400 | 0.44938700  |
| N          | 3.16737300  | -0.18737100 | -0.09638400 | C          | 4.62543300  | -0.53464900 | 0.97475000  |
| <b>TSS</b> |             |             |             | C          | 4.21052900  | -0.10870700 | -1.69533700 |
| <b>O 1</b> |             |             |             | C          | 5.72609900  | -0.47462200 | 0.12134500  |
| C          | -0.86467200 | 4.78426600  | 0.19085700  | C          | 5.51641000  | -0.25798100 | -1.24082300 |
| C          | 0.08841200  | 3.89659900  | 0.65953400  | H          | 3.99619800  | 0.07007900  | -2.74456900 |
| C          | -0.07346400 | 2.50274700  | 0.52525200  | H          | 6.73208500  | -0.58730400 | 0.51524300  |
| C          | -1.25459100 | 1.97682200  | -0.08370100 | H          | 6.34418900  | -0.19758700 | -1.93986900 |
| C          | -2.21997900 | 2.91565500  | -0.53879300 | N          | 3.14376700  | -0.17116700 | -0.87723300 |
| C          | -2.02924600 | 4.28043200  | -0.41542500 | H          | 2.31010800  | -0.15630700 | 2.33460600  |
| H          | -0.71489000 | 5.85586400  | 0.29066400  | H          | 1.76241500  | -1.52992100 | 1.35011300  |
| H          | 0.99086900  | 4.24986600  | 1.14735500  | H          | 4.75415800  | -0.69057100 | 2.04126800  |
| H          | -3.12220800 | 2.54604100  | -1.01406000 | <b>P1</b>  |             |             |             |
| H          | -2.78397200 | 4.96359800  | -0.79751000 | <b>O 1</b> |             |             |             |
| C          | -1.49246400 | 0.54902300  | -0.18617100 | C          | -2.25424800 | -2.87111300 | -0.35705100 |
| C          | -0.42153400 | -0.35718000 | -0.12683100 | C          | -1.18951700 | -2.02716900 | 0.03912600  |
| C          | -0.60580900 | -1.79892000 | 0.22224600  | C          | 0.04111300  | -2.63493100 | 0.38419100  |
| C          | -0.25255500 | -2.81589300 | -0.68277700 | C          | 0.18924300  | -4.03262300 | 0.34477900  |
| C          | -1.08149200 | -2.17523600 | 1.49184800  | C          | -0.86964300 | -4.83838500 | -0.03747500 |
| C          | -0.38359900 | -4.16246700 | -0.33911300 | C          | -2.09487900 | -4.24700600 | -0.39118000 |
| H          | 0.11316700  | -2.54326100 | -1.67047200 | H          | -3.20498900 | -2.43276700 | -0.63902900 |
| C          | -1.20455000 | -3.52043800 | 1.83972200  | H          | 1.15172300  | -4.45183200 | 0.61842600  |
| H          | -1.35437400 | -1.40257500 | 2.20504800  | H          | -0.75467300 | -5.91822400 | -0.06782800 |
| C          | -0.85769500 | -4.51879200 | 0.92541400  | H          | -2.92829200 | -4.87358600 | -0.69876600 |
| H          | -0.11498300 | -4.93181400 | -1.05853700 | C          | 1.19198500  | -1.82498100 | 0.78903000  |
| H          | -1.57417600 | -3.79016700 | 2.82577000  | O          | 2.28147400  | -2.29594200 | 1.12573900  |
| H          | -0.95684100 | -5.56658200 | 1.19656700  | N          | 0.99971300  | -0.43755800 | 0.79051100  |
| C          | -2.89546400 | 0.04943700  | -0.29415900 | C          | -1.30350400 | -0.58033200 | 0.09170100  |
| C          | -3.88600000 | 0.47826500  | 0.61232800  | C          | -0.21467000 | 0.17121900  | 0.45653300  |
| C          | -3.27586300 | -0.86802700 | -1.29050200 | C          | -2.60057600 | 0.06765400  | -0.28594700 |
| C          | -5.19344000 | 0.00035500  | 0.53230600  | C          | -2.75034500 | 0.71046400  | -1.52395700 |
| H          | -3.62030100 | 1.18539200  | 1.39306600  | C          | -3.70851900 | 0.01023200  | 0.57498300  |
| C          | -4.58339300 | -1.34917700 | -1.37022700 | C          | -3.96669300 | 1.29201600  | -1.88518800 |

|           |             |             |             |             |             |             |             |
|-----------|-------------|-------------|-------------|-------------|-------------|-------------|-------------|
| H         | -1.90582000 | 0.75314000  | -2.20598800 | C           | -2.99251800 | 0.27779600  | 0.73262000  |
| C         | -4.92581700 | 0.59019300  | 0.21487000  | O           | -3.95681200 | -0.36636600 | 1.15010600  |
| H         | -3.61244900 | -0.49022700 | 1.53525500  | N           | -1.70486600 | -0.13276900 | 0.92879900  |
| C         | -5.05803700 | 1.23502500  | -1.01663300 | C           | -1.38639300 | -1.41716200 | 1.53705000  |
| H         | -4.06097700 | 1.78833100  | -2.84769700 | H           | -2.21155300 | -1.67978300 | 2.20145000  |
| H         | -5.76956800 | 0.54021000  | 0.89855000  | H           | -0.47077600 | -1.30044400 | 2.12670200  |
| H         | -6.00524500 | 1.68779800  | -1.29797700 | C           | -1.17809900 | -2.50722100 | 0.50527700  |
| C         | -0.29856100 | 1.66468400  | 0.54651700  | C           | -2.19899900 | -3.39919200 | 0.17570300  |
| C         | 0.29665300  | 2.48554600  | -0.42418900 | C           | -1.98356200 | -4.36764600 | -0.80313300 |
| C         | -1.00415600 | 2.26141900  | 1.60200200  | H           | -3.15411600 | -3.31583500 | 0.68339500  |
| C         | 0.17925100  | 3.87326600  | -0.34112800 | C           | 0.23234400  | -3.49145900 | -1.06141600 |
| H         | 0.86704000  | 2.02788500  | -1.22618600 | C           | -0.73935000 | -4.41275400 | -1.43246100 |
| C         | -1.11684300 | 3.64996100  | 1.68355400  | H           | -2.76890000 | -5.06925000 | -1.06839200 |
| H         | -1.46848300 | 1.63494400  | 2.35800500  | H           | 1.21270500  | -3.49569200 | -1.52547900 |
| C         | -0.52810600 | 4.45938600  | 0.71070500  | H           | -0.51696700 | -5.14767900 | -2.19933000 |
| H         | 0.64178000  | 4.49712100  | -1.10162200 | N           | 0.03064000  | -2.54830200 | -0.11193700 |
| H         | -1.66734100 | 4.09755500  | 2.50680700  | Ni          | 1.46562300  | -1.30653100 | 0.26134800  |
| H         | -0.61890800 | 5.54070800  | 0.77220600  | H           | -1.33567800 | 1.52589000  | -1.14764600 |
| C         | 2.17860000  | 0.32658500  | 1.22244700  | H           | -0.93062300 | 0.41820200  | 0.58263500  |
| H         | 1.85974200  | 1.34533800  | 1.44362600  | C           | 2.50461400  | 0.15397400  | 1.07161200  |
| H         | 2.55065500  | -0.12414000 | 2.14473200  | H           | 2.68401000  | -0.13906100 | 2.11084900  |
| C         | 3.29757100  | 0.35203500  | 0.19283900  | C           | 3.24222100  | -0.49672100 | 0.06703300  |
| C         | 4.62982100  | 0.21110000  | 0.59711000  | H           | 3.95760600  | -1.26675600 | 0.37280800  |
| C         | 3.92905600  | 0.62180600  | -2.00047400 | C           | 1.96893500  | 1.56057300  | 0.90711700  |
| C         | 5.63763700  | 0.29662700  | -0.35966800 | H           | 1.64736700  | 1.74188300  | -0.12441300 |
| H         | 4.86540200  | 0.02603500  | 1.64093100  | H           | 1.07682900  | 1.69160700  | 1.53674800  |
| C         | 5.28334200  | 0.50536200  | -1.69258700 | C           | 3.55295700  | 0.14923000  | -1.26645500 |
| H         | 3.60966700  | 0.77778000  | -3.02973700 | H           | 3.68559200  | -0.63055000 | -2.02962500 |
| H         | 6.68013200  | 0.18909800  | -0.07209000 | H           | 2.71722400  | 0.76927300  | -1.60840200 |
| H         | 6.03323700  | 0.56966800  | -2.47525300 | C           | 2.97390200  | 2.65138400  | 1.31904500  |
| N         | 2.95237500  | 0.55390900  | -1.08647600 | H           | 2.45076000  | 3.62053600  | 1.30175300  |
|           |             |             |             | H           | 3.23413000  | 2.49930900  | 2.37968700  |
| <b>3'</b> |             |             |             | C           | 4.84064700  | 0.99423300  | -1.25274500 |
| 0 1       |             |             |             | H           | 5.68447400  | 0.33379800  | -0.99231100 |
| C         | -3.64425800 | 4.01336200  | -1.30849700 | H           | 5.05050600  | 1.30996300  | -2.28711500 |
| C         | -2.47463000 | 3.29529300  | -1.56612400 | C           | 4.97751000  | 2.22924200  | -0.38766300 |
| C         | -2.23648700 | 2.08617700  | -0.91109400 | H           | 5.92271900  | 2.72797800  | -0.61834800 |
| C         | -3.17133400 | 1.58154200  | 0.00518700  | C           | 4.27836200  | 2.85052400  | 0.57695700  |
| C         | -4.35260400 | 2.29848500  | 0.24198200  | H           | 4.77903400  | 3.74352000  | 0.96040100  |
| C         | -4.58403800 | 3.51118500  | -0.40385800 |             |             |             |             |
| H         | -3.82681800 | 4.95618800  | -1.81740700 | <b>TS1'</b> |             |             |             |
| H         | -1.74936900 | 3.67202400  | -2.28225000 | Ni          | -0.37590900 | 0.50224700  | 0.41524300  |
| H         | -5.07827600 | 1.88742600  | 0.93616000  | N           | -1.33857800 | -1.18026800 | 0.67299200  |
| H         | -5.49857200 | 4.06366700  | -0.20530200 | C           | 0.82523800  | 2.08993700  | 0.41613300  |

|   |             |             |             |     |             |             |             |
|---|-------------|-------------|-------------|-----|-------------|-------------|-------------|
| C | 1.42963000  | 1.07000500  | 1.16920700  | H   | -4.10674500 | 3.48386600  | -1.76154500 |
| C | -1.19518400 | -2.52226800 | 0.42915800  | H   | -0.07262400 | -0.69509800 | 1.25991700  |
| C | -2.64303800 | -0.74087900 | 1.17133100  |     |             |             |             |
| H | 0.28107400  | 2.86982900  | 0.95437600  | 4'  |             |             |             |
| C | 1.35097900  | 2.49982600  | -0.94352300 | 0 1 |             |             |             |
| H | 1.30320600  | 1.10519300  | 2.25254000  | C   | 4.63736000  | -2.14285600 | -0.71452300 |
| C | 2.67928600  | 0.34445600  | 0.71943000  | C   | 3.60335300  | -1.67247800 | -1.52785900 |
| C | 0.10304000  | -2.98354500 | -0.17491200 | C   | 2.86636000  | -0.54890700 | -1.14789000 |
| O | -2.08219700 | -3.35215300 | 0.67057800  | C   | 3.16278800  | 0.12704400  | 0.04418400  |
| H | -3.34427800 | -1.57898200 | 1.14551000  | C   | 4.22433000  | -0.33277500 | 0.83561200  |
| H | -2.56261600 | -0.41541400 | 2.22010900  | C   | 4.94546900  | -1.46905600 | 0.47062900  |
| C | -3.13822500 | 0.42245800  | 0.33718600  | H   | 5.20619200  | -3.02207900 | -1.00681600 |
| H | 1.75280600  | 1.63736000  | -1.48583300 | H   | 3.37230000  | -2.18013400 | -2.46139200 |
| H | 0.53072900  | 2.89050400  | -1.56133600 | H   | 4.47720000  | 0.21841400  | 1.73603400  |
| C | 2.42090100  | 3.60465900  | -0.87920200 | H   | 5.75468200  | -1.82310900 | 1.10463000  |
| H | 2.71236200  | -0.64922700 | 1.18184700  | C   | 2.47503100  | 1.40492500  | 0.45894100  |
| H | 2.67467500  | 0.17373700  | -0.36098600 | O   | 3.16593500  | 2.30165700  | 0.97287100  |
| C | 3.97227500  | 1.07771200  | 1.11832600  | N   | 1.14490700  | 1.55969000  | 0.19908600  |
| C | 0.83611800  | -2.22233300 | -1.09552600 | C   | 0.68963000  | 2.92397100  | 0.45535100  |
| C | 0.54468000  | -4.27703400 | 0.14302000  | H   | 1.33010900  | 3.65457300  | -0.05731700 |
| C | -4.49274600 | 0.70361500  | 0.15613600  | H   | 0.76675700  | 3.18343800  | 1.52462700  |
| N | -2.17517400 | 1.20163900  | -0.20579200 | C   | -0.73493700 | 3.10013800  | 0.01784200  |
| H | 2.65042400  | 3.91288100  | -1.91141700 | C   | -1.32121300 | 4.36263300  | -0.12922900 |
| H | 1.96619200  | 4.49872600  | -0.42126700 | C   | -2.65193300 | 4.45762500  | -0.51791800 |
| C | 3.74743700  | 3.39099500  | -0.18349700 | H   | -0.72776900 | 5.25177100  | 0.06055300  |
| H | 3.99664900  | 1.16521800  | 2.21731000  | C   | -2.72666700 | 2.06749600  | -0.58550200 |
| H | 4.81745400  | 0.41321900  | 0.88018300  | C   | -3.37294800 | 3.28343300  | -0.75363800 |
| C | 4.32902000  | 2.44179100  | 0.56817200  | H   | -3.12217500 | 5.42919700  | -0.64002000 |
| C | 1.99646300  | -2.74094000 | -1.67597300 | H   | -3.25218800 | 1.13273100  | -0.75399200 |
| H | 0.48576000  | -1.23168900 | -1.37168100 | H   | -4.41315500 | 3.30761000  | -1.06093000 |
| C | 1.71348600  | -4.78588500 | -0.41898000 | N   | -1.43640700 | 1.97014900  | -0.20930600 |
| H | -0.04618500 | -4.87272700 | 0.83159100  | Ni  | -0.27849800 | 0.32419600  | 0.11400200  |
| C | -4.86233400 | 1.81255300  | -0.60293700 | H   | 2.06486400  | -0.18292900 | -1.78155000 |
| H | -5.24133800 | 0.05626500  | 0.60253900  | H   | 0.66459300  | -0.72307600 | 0.44118400  |
| C | -2.53565100 | 2.27075500  | -0.93533200 | C   | -1.83715100 | -0.98546000 | 0.69496300  |
| H | 4.38201700  | 4.26777200  | -0.33599000 | H   | -2.57583200 | -0.24344800 | 0.99754100  |
| H | 5.33586900  | 2.71266100  | 0.89693800  | C   | -1.58022900 | -1.16519200 | -0.64714800 |
| C | 2.44236100  | -4.01853600 | -1.33296600 | H   | -2.11533800 | -0.55671600 | -1.37666500 |
| H | 2.54846300  | -2.14812300 | -2.40093900 | C   | -1.48550200 | -2.00938500 | 1.74331200  |
| H | 2.05168100  | -5.78398200 | -0.15259700 | H   | -0.56085500 | -2.53165000 | 1.48669400  |
| C | -3.86503300 | 2.61287300  | -1.16112100 | H   | -1.30347100 | -1.50527400 | 2.70002100  |
| H | -5.91170200 | 2.04539500  | -0.76034500 | C   | -0.92980300 | -2.40616200 | -1.20100900 |
| H | -1.72478900 | 2.86509500  | -1.34412600 | H   | -0.39378100 | -2.15913200 | -2.12502500 |
| H | 3.34801700  | -4.41905300 | -1.78140200 | H   | -0.18577200 | -2.80318800 | -0.50676200 |

|            |             |             |             |          |             |             |             |
|------------|-------------|-------------|-------------|----------|-------------|-------------|-------------|
| C          | -2.62046900 | -3.02798200 | 1.95634300  | H        | -2.40405000 | -0.70334200 | -1.40249700 |
| H          | -2.33004000 | -3.67429600 | 2.79868900  | C        | -1.04894800 | -1.95791500 | 1.55949600  |
| H          | -3.51284700 | -2.49185100 | 2.31859600  | H        | -0.24230900 | -2.54092700 | 1.10543800  |
| C          | -1.96623200 | -3.49452200 | -1.53797800 | H        | -0.59949900 | -1.36324200 | 2.36324300  |
| H          | -2.64464700 | -3.10731700 | -2.31588600 | C        | -1.34295300 | -2.65329100 | -1.35789100 |
| H          | -1.42968800 | -4.31986000 | -2.03017900 | H        | -1.10449500 | -2.50504500 | -2.41613100 |
| C          | -2.84038700 | -4.11528500 | -0.46843400 | H        | -0.41994000 | -2.99601100 | -0.88176500 |
| H          | -3.43464700 | -4.91801100 | -0.91166400 | C        | -2.06796900 | -2.92075000 | 2.19900000  |
| C          | -3.08493600 | -3.94093900 | 0.84125600  | H        | -1.55036200 | -3.45979300 | 3.00656700  |
| H          | -3.83500500 | -4.63288800 | 1.23230500  | H        | -2.83938400 | -2.32611700 | 2.71426500  |
| <b>4r'</b> |             |             |             | C        | -2.41696900 | -3.75350700 | -1.26372300 |
| C          | 4.72725100  | -2.07662800 | -0.43258900 | H        | -3.30404200 | -3.42849400 | -1.83183800 |
| C          | 5.27936900  | -0.79435000 | -0.50854000 | H        | -2.04109400 | -4.62507100 | -1.82050800 |
| C          | 4.50581100  | 0.31920200  | -0.18606300 | C        | -2.92093800 | -4.26965700 | 0.06770900  |
| C          | 3.16092900  | 0.17408700  | 0.18641500  | H        | -3.58360000 | -5.12116100 | -0.10505800 |
| C          | 2.61936600  | -1.11394700 | 0.26492900  | C        | -2.79215000 | -3.95787200 | 1.36812200  |
| C          | 3.39809700  | -2.23328600 | -0.03547100 | H        | -3.37164700 | -4.60894400 | 2.02699400  |
| H          | 5.33182500  | -2.94752000 | -0.67358900 | <b>2</b> |             |             |             |
| H          | 6.31583400  | -0.66437600 | -0.81010900 | 0 1      |             |             |             |
| H          | 1.58925400  | -1.23924600 | 0.57689900  | C        | -5.49461300 | 0.45821900  | -0.01274000 |
| H          | 2.96607900  | -3.22824200 | 0.04054800  | C        | -4.55664700 | 1.38479400  | 0.44601900  |
| C          | 2.40358200  | 1.41746300  | 0.57562500  | C        | -3.20139200 | 1.05429900  | 0.47270600  |
| O          | 3.03780200  | 2.34610700  | 1.10769700  | C        | -2.77079300 | -0.20922700 | 0.04110800  |
| N          | 1.05916100  | 1.47668100  | 0.34270900  | C        | -3.72238700 | -1.14122100 | -0.39702200 |
| C          | 0.47000600  | 2.69538700  | 0.88690000  | C        | -5.07393600 | -0.80670000 | -0.43238100 |
| H          | 1.10064400  | 3.56561800  | 0.65406300  | H        | -6.54973600 | 0.71748400  | -0.03544000 |
| H          | 0.43864500  | 2.66619400  | 1.98909100  | H        | -4.87925800 | 2.36282100  | 0.79271300  |
| C          | -0.91969300 | 2.95847200  | 0.37335600  | H        | -2.49003200 | 1.77551600  | 0.86667600  |
| C          | -1.65893900 | 4.07361500  | 0.79179800  | H        | -3.38312100 | -2.12431600 | -0.70681300 |
| C          | -2.92396600 | 4.29265300  | 0.26218700  | H        | -5.80087700 | -1.53373700 | -0.78425900 |
| H          | -1.22980400 | 4.75608000  | 1.51912400  | C        | -1.33087200 | -0.64515600 | 0.05768500  |
| C          | -2.65254500 | 2.30691000  | -1.04146700 | O        | -1.02407700 | -1.83240700 | 0.15241500  |
| C          | -3.43496800 | 3.39251500  | -0.68004800 | N        | -0.41509500 | 0.37237500  | -0.05465100 |
| H          | -3.50723300 | 5.15511400  | 0.57204400  | H        | -0.78879400 | 1.29122600  | -0.25207600 |
| H          | -3.00097200 | 1.57660300  | -1.76636700 | C        | 0.99597800  | 0.29837600  | -0.05950600 |
| H          | -4.41541100 | 3.53029900  | -1.12360600 | C        | 1.70269500  | 1.48063200  | -0.34351800 |
| N          | -1.42713200 | 2.09138100  | -0.52124600 | C        | 1.71944600  | -0.86787600 | 0.21611700  |
| Ni         | -0.09666200 | 0.53575300  | -0.96591000 | C        | 3.08898600  | 1.49840500  | -0.35331500 |
| H          | 4.93170600  | 1.31720300  | -0.21093700 | H        | 1.15614200  | 2.39694500  | -0.55836400 |
| H          | 0.69468500  | -0.44006200 | -1.93364000 | C        | 3.11724100  | -0.84960800 | 0.20690800  |
| C          | -1.68559300 | -1.04490900 | 0.54982100  | H        | 1.19045800  | -1.78589300 | 0.42903700  |
| H          | -2.16618600 | -0.14672800 | 0.93344900  | C        | 3.81356200  | 0.32930100  | -0.07719400 |
| C          | -1.80023300 | -1.34905300 | -0.76156800 | H        | 3.63172100  | 2.41282600  | -0.57254700 |

|           |             |             |             |            |             |             |             |
|-----------|-------------|-------------|-------------|------------|-------------|-------------|-------------|
| H         | 3.64657100  | -1.77053600 | 0.42372200  | C          | 3.14713600  | 1.29010000  | -1.14880900 |
| O         | 5.17314200  | 0.44824800  | -0.11146500 | C          | 4.10382600  | 0.16659000  | 0.76504900  |
| C         | 5.95375900  | -0.70213100 | 0.18236700  | C          | 0.79370700  | -2.88284700 | -1.72391400 |
| H         | 5.76218700  | -1.07412200 | 1.19753200  | C          | 3.16484900  | -2.41391500 | -1.75103500 |
| H         | 5.77566300  | -1.51074200 | -0.53890600 | C          | 0.87128000  | -0.92483300 | 2.61330800  |
| H         | 6.99605800  | -0.38347000 | 0.11027600  | C          | 2.26865400  | -2.73057800 | 1.80962200  |
|           |             |             |             | C          | 4.27953000  | 2.09879800  | -1.24323000 |
| <b>10</b> |             |             |             | H          | 2.32484000  | 1.42752300  | -1.84611100 |
| O 1       |             |             |             | C          | 5.23255300  | 0.98537900  | 0.67660800  |
| C         | 0.86758100  | 5.43245800  | -0.38182600 | H          | 4.04497100  | -0.57806900 | 1.55263500  |
| C         | 0.43873900  | 4.62381400  | -1.43792000 | C          | 0.98989400  | -3.94284800 | -2.60888500 |
| C         | 0.58482300  | 5.05452300  | 0.93289500  | H          | -0.20970500 | -2.64507700 | -1.37735600 |
| H         | 1.42005000  | 6.34647400  | -0.58291500 | C          | 3.35869100  | -3.46981900 | -2.64598900 |
| C         | -0.26645000 | 3.44808100  | -1.18361800 | H          | 4.01737100  | -1.82467900 | -1.42710500 |
| H         | 0.65858700  | 4.90488600  | -2.46465800 | C          | 0.88506900  | -1.48682700 | 3.89125900  |
| C         | -0.12539400 | 3.88357500  | 1.18978700  | H          | 0.30194500  | -0.01698800 | 2.42977900  |
| H         | 0.91455800  | 5.67637300  | 1.76124500  | C          | 2.27308000  | -3.29389800 | 3.08772000  |
| C         | -0.56464500 | 3.06321200  | 0.13733900  | H          | 2.80435000  | -3.22734500 | 1.00592700  |
| H         | -0.54797600 | 2.82092000  | -2.02567400 | C          | 5.32538100  | 1.94913500  | -0.32878300 |
| H         | -0.36147800 | 3.58385200  | 2.20501300  | H          | 4.33932800  | 2.85440300  | -2.02226000 |
| C         | -1.33551400 | 1.83063000  | 0.52133500  | H          | 6.03850900  | 0.86821500  | 1.39660900  |
| O         | -1.59335700 | 1.55240600  | 1.70393900  | C          | 2.27440300  | -4.23793500 | -3.07354200 |
| N         | -2.06392000 | 1.18497500  | -0.57506900 | H          | 0.13954600  | -4.53242800 | -2.94164800 |
| C         | -3.28903400 | 0.46775800  | -0.33880600 | H          | 4.35994600  | -3.69141900 | -3.00673800 |
| H         | -2.14603400 | 1.78001400  | -1.39615700 | C          | 1.58492100  | -2.67145300 | 4.13151800  |
| C         | -3.37172000 | -0.55439400 | 0.61831500  | H          | 0.33888800  | -1.00193100 | 4.69619000  |
| C         | -4.41636400 | 0.78323300  | -1.09668200 | H          | 2.81375500  | -4.22009500 | 3.26582600  |
| C         | -4.56684900 | -1.23628300 | 0.80422100  | H          | 6.20364500  | 2.58611200  | -0.39462000 |
| H         | -2.50322900 | -0.80122400 | 1.21558200  | H          | 2.42744900  | -5.05810300 | -3.77010100 |
| C         | -5.61844700 | 0.09075600  | -0.92334500 | H          | 1.58734500  | -3.11219300 | 5.12514700  |
| H         | -4.36666600 | 1.57786300  | -1.83837400 |            |             |             |             |
| C         | -5.69974100 | -0.92480900 | 0.03545700  | <b>TS6</b> |             |             |             |
| H         | -4.64238700 | -2.02623700 | 1.54527300  | O 1        |             |             |             |
| H         | -6.47337400 | 0.35756400  | -1.53375900 | Ni         | -0.30190100 | 0.42656300  | 0.20897100  |
| O         | -6.81669200 | -1.66443800 | 0.29210100  | C          | 0.72563700  | 5.78819200  | 0.11593400  |
| C         | -7.99567100 | -1.37711600 | -0.44593700 | C          | 1.06131600  | 4.51887100  | 0.58993800  |
| H         | -8.75584900 | -2.07042300 | -0.07905500 | C          | 0.10827400  | 3.49802200  | 0.59888700  |
| H         | -8.33916400 | -0.34754900 | -0.27898800 | C          | -1.19255500 | 3.73433400  | 0.13269900  |
| H         | -7.85127700 | -1.54133400 | -1.52225800 | C          | -1.52468500 | 5.02066900  | -0.32232100 |
| Ni        | -0.34641700 | 0.26102200  | -0.50656800 | C          | -0.57268700 | 6.03721100  | -0.33940900 |
| P         | 1.51474700  | -0.72541100 | -0.10266700 | H          | 1.46895200  | 6.58147300  | 0.10816700  |
| C         | 3.04929100  | 0.30775800  | -0.14927500 | H          | 2.06491600  | 4.31998400  | 0.95671700  |
| C         | 1.87959600  | -2.10978700 | -1.27791200 | H          | -2.54004300 | 5.20287600  | -0.65886000 |
| C         | 1.57154700  | -1.53764500 | 1.56001100  | H          | -0.84323300 | 7.02476900  | -0.70398100 |

|   |             |             |             |           |             |             |             |
|---|-------------|-------------|-------------|-----------|-------------|-------------|-------------|
| C | -2.28976600 | 2.70576100  | 0.11465500  | C         | -4.55280700 | -1.11685100 | 1.02820700  |
| O | -3.46934900 | 3.05632300  | 0.13806400  | H         | -3.14187600 | 0.13025000  | 2.07473000  |
| N | -1.92183700 | 1.36572100  | 0.04918400  | C         | -5.05073200 | -1.50163500 | -0.22241900 |
| H | 0.37555000  | 2.51502000  | 0.98266300  | H         | -4.90862100 | -1.23639700 | -2.34951100 |
| P | 1.51298000  | -0.74090900 | -0.00130100 | H         | -4.95034600 | -1.54008900 | 1.94364500  |
| C | 1.95548600  | -1.63948800 | 1.55185600  | O         | -6.04422300 | -2.41626600 | -0.41576700 |
| C | 1.66262200  | -1.00440800 | 2.77085000  | C         | -6.63852400 | -3.01511200 | 0.72695400  |
| C | 2.54333700  | -2.91336600 | 1.57550800  | H         | -7.11653300 | -2.26862800 | 1.37495300  |
| C | 1.96267900  | -1.62183400 | 3.98550700  | H         | -7.40158300 | -3.69742700 | 0.34568100  |
| H | 1.19369300  | -0.02257700 | 2.76546000  | H         | -5.90738800 | -3.58847300 | 1.31268300  |
| C | 2.83704700  | -3.53320300 | 2.79236200  |           |             |             |             |
| H | 2.76722600  | -3.42721600 | 0.64545300  | <b>11</b> |             |             |             |
| C | 2.55092400  | -2.88879500 | 3.99780000  | 0 1       |             |             |             |
| H | 1.73120400  | -1.11665700 | 4.91945700  | C         | 6.22214100  | -1.31026200 | -0.23063200 |
| H | 3.28909100  | -4.52158600 | 2.79687100  | C         | 5.12795200  | -1.33147000 | -1.09958400 |
| H | 2.77850800  | -3.37525300 | 4.94259200  | C         | 4.14457700  | -0.34513500 | -1.01444100 |
| C | 3.03496600  | 0.21713400  | -0.42759600 | C         | 4.24812600  | 0.68229800  | -0.06537400 |
| C | 2.91536700  | 1.25393600  | -1.36880900 | C         | 5.36100900  | 0.70736500  | 0.78728900  |
| C | 4.28909200  | -0.03624500 | 0.14823300  | C         | 6.33647100  | -0.28650900 | 0.71341900  |
| C | 4.02879700  | 2.01040100  | -1.73466300 | H         | 6.98469800  | -2.08267300 | -0.29419500 |
| H | 1.94532300  | 1.47198500  | -1.80773100 | H         | 5.04074600  | -2.11663200 | -1.84661500 |
| C | 5.40091100  | 0.72890100  | -0.21352400 | H         | 5.44813700  | 1.52133100  | 1.49979000  |
| H | 4.40082000  | -0.82703800 | 0.88363800  | H         | 7.18810200  | -0.26053400 | 1.38880800  |
| C | 5.27383500  | 1.75098700  | -1.15578600 | C         | 3.25701200  | 1.81480400  | 0.04131300  |
| H | 3.92107600  | 2.80816700  | -2.46469600 | O         | 3.62451300  | 2.89230900  | 0.52907500  |
| H | 6.36547600  | 0.52490000  | 0.24409500  | N         | 2.01252100  | 1.58519000  | -0.48351600 |
| H | 6.13927900  | 2.34647200  | -1.43437800 | Ni        | 0.67655000  | 0.27592600  | -0.28137100 |
| C | 1.43605200  | -2.06344100 | -1.28804300 | P         | -0.96440000 | -1.16629700 | 0.05056200  |
| C | 0.20195700  | -2.69874300 | -1.50315100 | C         | -0.65691000 | -2.77011000 | -0.79893200 |
| C | 2.54640100  | -2.45810700 | -2.04972700 | C         | 0.06005800  | -2.75037400 | -2.00581200 |
| C | 0.08439300  | -3.71746800 | -2.44909100 | C         | -1.11745300 | -3.99664200 | -0.29757200 |
| H | -0.66949000 | -2.38706200 | -0.93308900 | C         | 0.29885900  | -3.93327500 | -2.70614900 |
| C | 2.42406800  | -3.47211200 | -3.00276000 | H         | 0.44104600  | -1.80760500 | -2.38983000 |
| H | 3.50600500  | -1.97081500 | -1.90665800 | C         | -0.86933200 | -5.18001200 | -0.99593600 |
| C | 1.19539600  | -4.10448700 | -3.20261000 | H         | -1.66075600 | -4.03399400 | 0.64166400  |
| H | -0.87668900 | -4.20040600 | -2.60412700 | C         | -0.16566500 | -5.15015000 | -2.20174900 |
| H | 3.29022100  | -3.76489700 | -3.59051100 | H         | 0.85468800  | -3.90457000 | -3.63940100 |
| H | 1.10242800  | -4.89100500 | -3.94685700 | H         | -1.22531200 | -6.12531200 | -0.59513400 |
| H | -0.93200000 | 1.16241600  | -0.96240800 | H         | 0.02738800  | -6.07291600 | -2.74233500 |
| C | -2.98897600 | 0.40394700  | -0.04977200 | C         | -2.63742400 | -0.63796100 | -0.51958200 |
| C | -3.49864000 | 0.01571700  | -1.29848500 | C         | -3.12421300 | 0.59971900  | -0.06511200 |
| C | -3.52375600 | -0.17363400 | 1.10418400  | C         | -3.41995600 | -1.39498400 | -1.40339400 |
| C | -4.51209200 | -0.92926900 | -1.38643100 | C         | -4.37276900 | 1.06320600  | -0.47762800 |
| H | -3.09204700 | 0.46126400  | -2.20219000 | H         | -2.52500300 | 1.20341600  | 0.61086800  |

|           |             |             |             |           |             |             |             |
|-----------|-------------|-------------|-------------|-----------|-------------|-------------|-------------|
| C         | -4.66844400 | -0.92453100 | -1.81956700 | H         | -4.84132100 | 2.50365000  | 0.00000400  |
| H         | -3.06072800 | -2.35175500 | -1.76821200 | H         | -2.41141200 | 1.91681500  | -0.00056600 |
| C         | -5.14724300 | 0.30211200  | -1.35778200 | H         | -3.37372900 | -2.23199900 | 0.00028500  |
| H         | -4.73331900 | 2.02441500  | -0.12170100 | H         | -5.81983500 | -1.68775000 | 0.00095500  |
| H         | -5.26469200 | -1.52055500 | -2.50539000 | C         | -1.27173700 | -0.59030400 | -0.00049200 |
| H         | -6.11734600 | 0.66671400  | -1.68479300 | O         | -1.01639600 | -1.82451500 | -0.00079600 |
| C         | -1.21063200 | -1.57820700 | 1.83004300  | N         | -0.44874100 | 0.46363500  | -0.00028200 |
| C         | -0.11403300 | -1.51092900 | 2.70489800  | C         | 0.92864700  | 0.32058600  | -0.00023100 |
| C         | -2.46397700 | -1.96527400 | 2.33321400  | C         | 1.68481600  | 1.52429800  | -0.00021400 |
| C         | -0.26780100 | -1.83642100 | 4.05359400  | C         | 1.68504200  | -0.87960700 | -0.00008400 |
| H         | 0.85543500  | -1.19896000 | 2.32854500  | C         | 3.07168800  | 1.53899100  | -0.00005000 |
| C         | -2.61292000 | -2.28872100 | 3.68284500  | H         | 1.13096700  | 2.46070900  | -0.00032400 |
| H         | -3.32571300 | -2.00789500 | 1.67403700  | C         | 3.08505500  | -0.86957100 | 0.00011500  |
| C         | -1.51549300 | -2.22630800 | 4.54451600  | H         | 1.14568300  | -1.81726600 | -0.00012300 |
| H         | 0.58804200  | -1.77833000 | 4.72047000  | C         | 3.79123100  | 0.33562000  | 0.00013400  |
| H         | -3.58769900 | -2.58648500 | 4.05994400  | H         | 3.62157000  | 2.47751600  | -0.00004100 |
| H         | -1.63382700 | -2.47515600 | 5.59573900  | H         | 3.61203700  | -1.81973300 | 0.00026700  |
| H         | 3.29688800  | -0.36043700 | -1.69009500 | O         | 5.16915300  | 0.45124800  | 0.00038900  |
| H         | 1.54325100  | -0.79299600 | 0.19598200  | C         | 5.92340900  | -0.74199700 | 0.00033300  |
| C         | 0.99412300  | 2.55282000  | -0.45973300 | H         | 5.72981300  | -1.35452600 | 0.89344800  |
| C         | -0.01536700 | 2.39750600  | -1.44592500 | H         | 5.72986100  | -1.35442800 | -0.89285900 |
| C         | 0.80061700  | 3.55447800  | 0.52366700  | H         | 6.97545900  | -0.44102500 | 0.00038500  |
| C         | -1.16152500 | 3.19880200  | -1.44873800 |           |             |             |             |
| H         | 0.15807100  | 1.70530400  | -2.26835600 | <b>12</b> |             |             |             |
| C         | -0.32909400 | 4.36031800  | 0.50514300  | -1 1      |             |             |             |
| H         | 1.56364200  | 3.70106900  | 1.27602700  | Ni        | -0.04799500 | -0.09976300 | -0.28458000 |
| C         | -1.32641500 | 4.18607000  | -0.47675000 | P         | -0.40918900 | 2.02347600  | 0.03996400  |
| H         | -1.92069700 | 3.08061200  | -2.21528900 | P         | 1.49290100  | -1.23159600 | 0.74264800  |
| H         | -0.43458500 | 5.12625700  | 1.26586900  | C         | 1.89371500  | -3.00042400 | 0.24783300  |
| O         | -2.46544100 | 4.93181200  | -0.55925600 | C         | 1.15268000  | -3.57265700 | -0.79347300 |
| C         | -2.67076300 | 5.96526800  | 0.39545600  | C         | 2.86036000  | -3.78813100 | 0.89712500  |
| H         | -3.62033200 | 6.43365800  | 0.12721800  | C         | 1.37453800  | -4.89692800 | -1.18608500 |
| H         | -2.74334900 | 5.56752900  | 1.41638700  | H         | 0.39365600  | -2.97380800 | -1.28669500 |
| H         | -1.87550400 | 6.72078400  | 0.35596900  | C         | 3.08484100  | -5.10805200 | 0.50667700  |
|           |             |             |             | H         | 3.44091900  | -3.36875500 | 1.71470900  |
| <b>2'</b> |             |             |             | C         | 2.34102800  | -5.66630700 | -0.53862000 |
| -1 1      |             |             |             | H         | 0.78791200  | -5.32123200 | -1.99720100 |
| C         | -5.49196500 | 0.44495900  | 0.00052300  | H         | 3.83635700  | -5.70396600 | 1.02019000  |
| C         | -4.53006200 | 1.46040300  | 0.00006600  | H         | 2.51402600  | -6.69675600 | -0.84084700 |
| C         | -3.17163000 | 1.14260100  | -0.00026500 | C         | 3.19605600  | -0.47330300 | 0.69474100  |
| C         | -2.74481900 | -0.19418300 | -0.00018900 | C         | 3.47806000  | 0.68295500  | 1.44871500  |
| C         | -3.71873400 | -1.20252700 | 0.00024500  | C         | 4.18419200  | -0.93275400 | -0.19284100 |
| C         | -5.07899600 | -0.88992400 | 0.00060900  | C         | 4.71248000  | 1.32720000  | 1.34858600  |
| H         | -6.55162900 | 0.69264800  | 0.00080000  | H         | 2.72462400  | 1.08779500  | 2.11850200  |

|   |             |             |             |            |             |             |             |
|---|-------------|-------------|-------------|------------|-------------|-------------|-------------|
| C | 5.41246200  | -0.27627900 | -0.30823400 | C          | 2.82220300  | 3.81419300  | -1.81248100 |
| H | 3.99602600  | -1.81049700 | -0.80256300 | H          | 2.43641200  | 2.19722300  | -0.45154200 |
| C | 5.68760800  | 0.85106100  | 0.46717400  | C          | 2.26966300  | 4.83027900  | -2.59759600 |
| H | 4.90625100  | 2.21013700  | 1.95342400  | H          | 0.44382100  | 5.80506700  | -3.20537500 |
| H | 6.15641200  | -0.65382900 | -1.00616600 | H          | 3.89717100  | 3.64935500  | -1.80432400 |
| H | 6.64664900  | 1.35655200  | 0.38305800  | H          | 2.91000700  | 5.46257200  | -3.20805700 |
| C | 1.23574400  | -1.55773100 | 2.57102700  | C          | 2.42940500  | -0.59749100 | -4.88698400 |
| C | 2.20885000  | -1.41176300 | 3.57225400  | C          | 2.08345700  | 0.12483900  | -3.74364400 |
| C | -0.03702800 | -2.02052000 | 2.95162100  | C          | 0.90044200  | -0.16513300 | -3.05728400 |
| C | 1.91545400  | -1.70162600 | 4.90848700  | C          | 0.03796600  | -1.17558000 | -3.50165500 |
| H | 3.20554600  | -1.06669700 | 3.31741400  | C          | 0.39069000  | -1.88054100 | -4.66524100 |
| C | -0.32808600 | -2.32059100 | 4.28279200  | C          | 1.57486500  | -1.60481400 | -5.34618100 |
| H | -0.80757100 | -2.14699600 | 2.19661400  | H          | 3.35181100  | -0.37460000 | -5.41935900 |
| C | 0.64696600  | -2.15642200 | 5.27054600  | H          | 2.72767000  | 0.92235300  | -3.38235100 |
| H | 2.68638500  | -1.57510500 | 5.66561200  | H          | 0.63495800  | 0.41892400  | -2.17405900 |
| H | -1.32039600 | -2.67858700 | 4.54682700  | H          | -0.29371900 | -2.64502400 | -5.01768000 |
| H | 0.42001100  | -2.38310400 | 6.30957900  | H          | 1.83043000  | -2.17245200 | -6.23884200 |
| C | -2.13563800 | 2.66732000  | -0.29380900 | C          | -1.27460100 | -1.55480200 | -2.83322900 |
| C | -2.78352200 | 3.66466700  | 0.45272100  | O          | -2.06290900 | -2.23093100 | -3.53856600 |
| C | -2.82593600 | 2.08409900  | -1.37007700 | N          | -1.45067600 | -1.15622100 | -1.54934000 |
| C | -4.07945400 | 4.07370000  | 0.12605200  | C          | -2.63555000 | -1.50286600 | -0.86854000 |
| H | -2.27890200 | 4.12684500  | 1.29579900  | C          | -2.72786000 | -1.11074400 | 0.49078500  |
| C | -4.11448400 | 2.50228000  | -1.70541500 | C          | -3.76126500 | -2.19065700 | -1.38145700 |
| H | -2.35116700 | 1.28424800  | -1.93128300 | C          | -3.83722900 | -1.37954900 | 1.28081900  |
| C | -4.74699100 | 3.49770300  | -0.95679600 | H          | -1.88216300 | -0.56866700 | 0.91447800  |
| H | -4.56669000 | 4.84391600  | 0.72027600  | C          | -4.88384800 | -2.46557200 | -0.58961200 |
| H | -4.62905000 | 2.03482100  | -2.54129500 | H          | -3.74443100 | -2.50969400 | -2.41202900 |
| H | -5.75617500 | 3.81477700  | -1.20941200 | C          | -4.93538000 | -2.06563900 | 0.74680800  |
| C | -0.10158200 | 2.75595600  | 1.73452500  | H          | -3.87116000 | -1.05963200 | 2.31948400  |
| C | 0.36679400  | 4.06223600  | 1.95487700  | O          | -5.99049400 | -2.29061300 | 1.60453500  |
| C | -0.35039700 | 1.94473700  | 2.85389400  | H          | -5.71516300 | -2.99698400 | -1.04327700 |
| C | 0.57959700  | 4.53943000  | 3.25148100  | C          | -7.12158200 | -2.96221800 | 1.08895600  |
| H | 0.56807600  | 4.71439000  | 1.11030300  | H          | -7.84132400 | -3.02458500 | 1.91052700  |
| C | -0.14883100 | 2.42206500  | 4.15019500  | H          | -7.58313400 | -2.41367700 | 0.25502500  |
| H | -0.68546400 | 0.92259800  | 2.70544200  | H          | -6.87941300 | -3.98056900 | 0.75136400  |
| C | 0.31981100  | 3.72252200  | 4.35377200  |            |             |             |             |
| H | 0.94706700  | 5.55284700  | 3.39798700  | <b>TS7</b> |             |             |             |
| H | -0.34525100 | 1.77084100  | 4.99840400  | -1 1       |             |             |             |
| H | 0.48764200  | 4.09296500  | 5.36232900  | Ni         | 0.53618500  | 0.93719500  | -0.25968200 |
| C | 0.60320200  | 3.18614500  | -1.01677000 | P          | 2.28848300  | 0.35279300  | 0.66357200  |
| C | 0.06215900  | 4.21116900  | -1.80883200 | P          | -1.38055200 | -1.60201500 | -0.27415700 |
| C | 1.99668700  | 2.99585300  | -1.04075900 | C          | -2.74272700 | -1.43933600 | -1.52221100 |
| C | 0.88740200  | 5.02113600  | -2.59550000 | C          | -2.48203500 | -0.62663000 | -2.63714600 |
| H | -1.00920700 | 4.38333000  | -1.81640600 | C          | -4.00319700 | -2.04938600 | -1.41262500 |



|   |             |             |             |   |             |             |             |
|---|-------------|-------------|-------------|---|-------------|-------------|-------------|
| C | -3.45006200 | -0.44030100 | -3.62706000 | C | 3.11199800  | -2.78141100 | 3.34576800  |
| H | -1.52318400 | -0.12444700 | -2.71772500 | H | 4.09247300  | -1.93766200 | 1.62910000  |
| C | -4.97300000 | -1.85825000 | -2.39846800 | C | 1.03998600  | -1.73547500 | 4.00795700  |
| H | -4.23122900 | -2.67120100 | -0.55169800 | H | 0.38330400  | -0.09371500 | 2.77731900  |
| C | -4.69750200 | -1.05583500 | -3.50948400 | C | 2.01679500  | -2.71532500 | 4.20959700  |
| H | -3.22974100 | 0.19966000  | -4.47724100 | H | 3.87675800  | -3.54144100 | 3.49173100  |
| H | -5.94520900 | -2.33564700 | -2.29827600 | H | 0.17507100  | -1.68077700 | 4.66451100  |
| H | -5.45608500 | -0.90353900 | -4.27359300 | H | 1.92097600  | -3.42494100 | 5.02803400  |
| C | -0.63247600 | -3.24179200 | -0.71781700 | C | 3.62223900  | -0.39280800 | -0.42207400 |
| C | 0.36440900  | -3.75689600 | 0.13341200  | C | 4.97875800  | -0.03228000 | -0.38413100 |
| C | -0.91991600 | -3.94132900 | -1.90091400 | C | 3.21906800  | -1.35451200 | -1.36612700 |
| C | 1.03315300  | -4.93999800 | -0.17794900 | C | 5.90190600  | -0.61264500 | -1.25996900 |
| H | 0.61782500  | -3.22752200 | 1.04743000  | H | 5.32145800  | 0.70896000  | 0.33140200  |
| C | -0.23990500 | -5.12089300 | -2.21840400 | C | 4.14094500  | -1.94592100 | -2.23066000 |
| H | -1.67794700 | -3.56573800 | -2.58093900 | H | 2.17028100  | -1.63339900 | -1.42370000 |
| C | 0.73517400  | -5.62767900 | -1.35818600 | C | 5.48782700  | -1.57328400 | -2.18388300 |
| H | 1.79622200  | -5.31676600 | 0.49867700  | H | 6.94667500  | -0.31222300 | -1.21674500 |
| H | -0.47858700 | -5.64511700 | -3.14108200 | H | 3.80454700  | -2.69175800 | -2.94707700 |
| H | 1.26285200  | -6.54554800 | -1.60584800 | H | 6.20561800  | -2.02485600 | -2.86480900 |
| C | -2.32155800 | -2.01286600 | 1.27447100  | C | 1.35583000  | 1.75709100  | -5.58421000 |
| C | -2.64250200 | -3.31260800 | 1.69951800  | C | 1.77137400  | 1.35202800  | -4.31326400 |
| C | -2.71603600 | -0.92877700 | 2.07833500  | C | 1.00045700  | 1.65670600  | -3.18842400 |
| C | -3.34031700 | -3.52196200 | 2.89171200  | C | -0.19907000 | 2.37192200  | -3.31042400 |
| H | -2.34261500 | -4.16787800 | 1.10140000  | C | -0.59864800 | 2.78333600  | -4.59294600 |
| C | -3.42125300 | -1.13785000 | 3.26481400  | C | 0.16426900  | 2.47577100  | -5.71922500 |
| H | -2.46450200 | 0.08342700  | 1.77567700  | H | 1.95535400  | 1.51820800  | -6.46026000 |
| C | -3.73307200 | -2.43576500 | 3.67724100  | H | 2.69881900  | 0.79693500  | -4.19159000 |
| H | -3.57826200 | -4.53619400 | 3.20469800  | H | 1.33117700  | 1.34264800  | -2.19333700 |
| H | -3.71551600 | -0.28316900 | 3.86880600  | H | -1.51986700 | 3.35104300  | -4.67336900 |
| H | -4.27505500 | -2.60016600 | 4.60560100  | H | -0.16791500 | 2.80018700  | -6.70345100 |
| C | 3.23917000  | 1.75189000  | 1.48244200  | C | -1.10728100 | 2.75447600  | -2.14843000 |
| C | 3.99583700  | 1.61982500  | 2.65818800  | O | -2.04103300 | 3.54633700  | -2.40679200 |
| C | 3.15972600  | 3.02174800  | 0.88486500  | N | -0.83434800 | 2.21599900  | -0.93561500 |
| C | 4.64889500  | 2.72142500  | 3.21976700  | C | -1.71324000 | 2.56171200  | 0.12297800  |
| H | 4.07411400  | 0.65300100  | 3.14677900  | C | -1.17857700 | 2.94299000  | 1.37239100  |
| C | 3.82286600  | 4.11970400  | 1.43516600  | C | -3.11527600 | 2.48789700  | 0.02837800  |
| H | 2.55155000  | 3.14167300  | -0.00867600 | C | -1.99377900 | 3.22380100  | 2.46566800  |
| C | 4.56757600  | 3.97402100  | 2.60894200  | H | -0.09902700 | 3.01242900  | 1.46890500  |
| H | 5.22181300  | 2.59751500  | 4.13638100  | C | -3.94338700 | 2.76636600  | 1.12132500  |
| H | 3.74638700  | 5.09175300  | 0.95339200  | H | -3.56472100 | 2.21010500  | -0.91696700 |
| H | 5.07300200  | 4.83132500  | 3.04758800  | C | -3.38713100 | 3.13468800  | 2.35076300  |
| C | 2.25950400  | -0.88338400 | 2.07397300  | H | -1.56368700 | 3.51796400  | 3.41968200  |
| C | 3.23327800  | -1.87198600 | 2.29015400  | O | -4.11111300 | 3.42418300  | 3.48719500  |
| C | 1.15924300  | -0.83530300 | 2.94791100  | H | -5.01864200 | 2.68734600  | 0.99693400  |

|           |             |             |             |            |             |             |             |
|-----------|-------------|-------------|-------------|------------|-------------|-------------|-------------|
| C         | -5.52063700 | 3.35611500  | 3.40201000  | C          | -0.12612000 | 3.04862700  | -1.14264700 |
| H         | -5.89976300 | 3.62340200  | 4.39264300  | C          | 0.75969600  | 3.41000600  | -0.11220600 |
| H         | -5.92417900 | 4.06545300  | 2.66507500  | C          | 0.45792200  | 4.53964700  | 0.66204300  |
| H         | -5.87129400 | 2.34521600  | 3.14827500  | C          | 1.96016900  | 3.49315200  | -2.17938200 |
| <b>13</b> |             |             |             | H          | 0.11575100  | 2.20155600  | -1.77876800 |
| -1 1      |             |             |             | H          | 1.16318600  | 4.83436700  | 1.43313100  |
| Ni        | 0.30135300  | 0.46598000  | -0.16166600 | H          | -0.94027200 | 6.12829000  | 1.07064800  |
| P         | -1.39744700 | -0.67801600 | 0.03559400  | C          | 2.06217700  | 2.67753300  | 0.15434500  |
| C         | -2.35298600 | -0.49308900 | 1.63462100  | O          | 3.00271800  | 3.34739500  | 0.63262000  |
| C         | -2.36719400 | 0.77994600  | 2.23015800  | N          | 2.04746600  | 1.35934800  | -0.17147200 |
| C         | -3.02518700 | -1.53947800 | 2.28604500  | C          | 3.22368100  | 0.58434600  | -0.14954800 |
| C         | -3.04649900 | 1.00477000  | 3.42814800  | C          | 3.15070100  | -0.70856200 | -0.72469600 |
| H         | -1.82997300 | 1.59305600  | 1.74913100  | C          | 4.47735600  | 0.96646400  | 0.37371500  |
| C         | -3.69694600 | -1.31859600 | 3.49221700  | C          | 4.24237000  | -1.56361000 | -0.76813300 |
| H         | -3.02294700 | -2.53606300 | 1.85426800  | H          | 2.19353900  | -1.02317800 | -1.13522300 |
| C         | -3.71225800 | -0.04586900 | 4.06574200  | C          | 5.58340100  | 0.10686800  | 0.33003200  |
| H         | -3.04459700 | 1.99845900  | 3.86996000  | H          | 4.57353200  | 1.94737500  | 0.81577300  |
| H         | -4.20667500 | -2.14456400 | 3.98363900  | C          | 5.47803700  | -1.16301800 | -0.23975700 |
| H         | -4.23307500 | 0.12492400  | 5.00507700  | H          | 4.15949100  | -2.55031000 | -1.21711600 |
| C         | -2.76099000 | -0.45011000 | -1.23189600 | O          | 6.50342400  | -2.07946400 | -0.33038700 |
| C         | -2.36802100 | -0.27426900 | -2.57067100 | H          | 6.52288500  | 0.45095700  | 0.75209300  |
| C         | -4.13164100 | -0.40632000 | -0.93408100 | C          | 7.77220000  | -1.69053900 | 0.15494000  |
| C         | -3.31210300 | -0.08025400 | -3.57942100 | H          | 8.44345800  | -2.53396600 | -0.03118200 |
| H         | -1.30750700 | -0.28099800 | -2.81318800 | H          | 8.16031500  | -0.80528700 | -0.36950300 |
| C         | -5.07959800 | -0.19878700 | -1.94142600 | H          | 7.75565000  | -1.48229400 | 1.23474800  |
| H         | -4.46709600 | -0.53138600 | 0.09100400  | <b>TS8</b> |             |             |             |
| C         | -4.67433800 | -0.03872000 | -3.26714400 | -1 1       |             |             |             |
| H         | -2.98423600 | 0.04866400  | -4.60847300 | Ni         | -0.35259900 | 1.30297400  | -0.06070600 |
| H         | -6.13648300 | -0.16237100 | -1.68597900 | P          | -1.30950500 | -0.64398800 | -0.07807000 |
| H         | -5.41150100 | 0.12335400  | -4.05007300 | C          | -0.35526200 | -2.22783800 | -0.33349400 |
| C         | -1.16715900 | -2.53439200 | -0.03267900 | C          | -0.55312700 | -3.41177500 | 0.39364300  |
| C         | -2.07424800 | -3.42787700 | -0.62466000 | C          | 0.64070000  | -2.21042000 | -1.32396700 |
| C         | 0.00935100  | -3.05701300 | 0.53142900  | C          | 0.21399500  | -4.54976800 | 0.12767900  |
| C         | -1.81379400 | -4.80154900 | -0.65008800 | H          | -1.30860500 | -3.45176800 | 1.17263700  |
| H         | -2.98943000 | -3.05334200 | -1.07384400 | C          | 1.39709400  | -3.34956500 | -1.60050200 |
| C         | 0.26476700  | -4.42857600 | 0.51825000  | H          | 0.83244500  | -1.28995900 | -1.86942000 |
| H         | 0.73301500  | -2.37100200 | 0.96481200  | C          | 1.18617700  | -4.52395400 | -0.87379100 |
| C         | -0.64578100 | -5.30683900 | -0.07676000 | H          | 0.05012300  | -5.45655700 | 0.70583000  |
| H         | -2.52627000 | -5.47568000 | -1.12074500 | H          | 2.16477700  | -3.31215700 | -2.36920400 |
| H         | 1.18197400  | -4.80992300 | 0.96087500  | H          | 1.78475000  | -5.40857500 | -1.07775900 |
| H         | -0.44205200 | -6.37485800 | -0.09959100 | C          | -2.16796000 | -0.95651100 | 1.54426600  |
| C         | -1.59580900 | 4.88983400  | -0.57231400 | C          | -3.34496400 | -1.71083800 | 1.67414400  |
| C         | -1.29079000 | 3.78698400  | -1.37417100 | C          | -1.60915700 | -0.38347600 | 2.69931500  |

|   |             |             |             |           |             |             |             |
|---|-------------|-------------|-------------|-----------|-------------|-------------|-------------|
| C | -3.94151100 | -1.89456100 | 2.92441800  | C         | 6.86208000  | -2.16482600 | -0.13011500 |
| H | -3.80186500 | -2.15488400 | 0.79460600  | H         | 7.43628000  | -1.23868500 | 0.01836500  |
| C | -2.20067900 | -0.57229000 | 3.94947900  | H         | 7.46381800  | -3.01122300 | 0.21379900  |
| H | -0.71480200 | 0.22771900  | 2.60794300  | H         | 6.66041500  | -2.28602700 | -1.20464600 |
| C | -3.36969300 | -1.32841200 | 4.06575100  |           |             |             |             |
| H | -4.85522800 | -2.47902800 | 3.00489300  | <b>14</b> |             |             |             |
| H | -1.75249700 | -0.11953100 | 4.83050300  | -1 1      |             |             |             |
| H | -3.83623900 | -1.46926800 | 5.03779500  | Ni        | -1.02657100 | 1.20996500  | 0.38504400  |
| C | -2.71133600 | -0.90259000 | -1.29238700 | P         | -0.91228200 | -1.03886200 | 0.01920000  |
| C | -2.90062400 | -2.08117000 | -2.03082000 | C         | 0.60811700  | -2.05521800 | -0.32665100 |
| C | -3.62208300 | 0.15076700  | -1.48238300 | C         | 1.00501200  | -3.15692400 | 0.44435100  |
| C | -3.96367100 | -2.20103900 | -2.93168300 | C         | 1.41935900  | -1.66573300 | -1.40702000 |
| H | -2.21525500 | -2.91355300 | -1.91095400 | C         | 2.17375300  | -3.85993400 | 0.13613500  |
| C | -4.69072600 | 0.02791600  | -2.36984400 | H         | 0.40192800  | -3.47608500 | 1.28802500  |
| H | -3.47796400 | 1.07777400  | -0.93450700 | C         | 2.57990100  | -2.37183900 | -1.71887500 |
| C | -4.86492300 | -1.14997400 | -3.10176200 | H         | 1.14281100  | -0.80150000 | -2.00481200 |
| H | -4.08426100 | -3.12121900 | -3.49901500 | C         | 2.96139300  | -3.47356100 | -0.94766400 |
| H | -5.38231800 | 0.85745500  | -2.49710200 | H         | 2.46460300  | -4.71129000 | 0.74722000  |
| H | -5.69056800 | -1.24343100 | -3.80319300 | H         | 3.19392800  | -2.05208100 | -2.55679200 |
| C | -1.45057200 | 5.53235600  | 0.41714400  | H         | 3.87115300  | -4.01947600 | -1.18519100 |
| C | -1.66116400 | 4.15070800  | 0.35155500  | C         | -1.71060300 | -1.98037400 | 1.40376500  |
| C | -0.64110300 | 3.25586700  | -0.02805300 | C         | -2.41925700 | -3.17881900 | 1.23196200  |
| C | 0.62959000  | 3.81782700  | -0.31923200 | C         | -1.58948600 | -1.44917700 | 2.69758900  |
| C | 0.82596200  | 5.20191100  | -0.29847600 | C         | -2.98704400 | -3.83284800 | 2.32810100  |
| C | -0.20900300 | 6.06612700  | 0.06650900  | H         | -2.53947500 | -3.60209100 | 0.23931100  |
| H | -2.26291700 | 6.19032000  | 0.72195400  | C         | -2.14755700 | -2.10752900 | 3.79471100  |
| H | -2.65118900 | 3.75873400  | 0.58378600  | H         | -1.07223500 | -0.50366100 | 2.83748400  |
| H | 1.81878500  | 5.57599100  | -0.53569200 | C         | -2.84891100 | -3.30141700 | 3.61210800  |
| H | -0.04472200 | 7.14164000  | 0.08947600  | H         | -3.54004600 | -4.75683200 | 2.17625900  |
| C | 1.83946300  | 2.92974600  | -0.49859600 | H         | -2.04455100 | -1.67990300 | 4.78882900  |
| O | 2.90081700  | 3.41847000  | -0.93762100 | H         | -3.29297800 | -3.81015200 | 4.46432200  |
| N | 1.62191400  | 1.65943400  | -0.04947700 | C         | -1.94063200 | -1.47934000 | -1.47151500 |
| C | 2.68630000  | 0.74802700  | 0.03852400  | C         | -1.76584700 | -2.68411700 | -2.17458100 |
| C | 2.56112900  | -0.31951100 | 0.95841900  | C         | -2.91338700 | -0.57459700 | -1.92789300 |
| C | 3.88541100  | 0.79215300  | -0.70600900 | C         | -2.54905400 | -2.98197000 | -3.29157500 |
| C | 3.55769300  | -1.26962200 | 1.13525000  | H         | -1.00554800 | -3.39085300 | -1.85724400 |
| H | 1.64819700  | -0.38178900 | 1.54321900  | C         | -3.69385900 | -0.87248000 | -3.04725000 |
| C | 4.89198300  | -0.16672700 | -0.53797800 | H         | -3.04791400 | 0.36541400  | -1.40279800 |
| H | 4.03062700  | 1.60126300  | -1.40738200 | C         | -3.51652100 | -2.07625100 | -3.73145700 |
| C | 4.74040800  | -1.20247800 | 0.38684300  | H         | -2.39642100 | -3.91977600 | -3.82062200 |
| H | 3.43552800  | -2.07858400 | 1.85092100  | H         | -4.43733500 | -0.15549700 | -3.38675200 |
| H | 5.79344800  | -0.08312700 | -1.13767500 | H         | -4.12199400 | -2.30434300 | -4.60545300 |
| O | 5.67608100  | -2.18411700 | 0.63672100  | C         | -3.33838300 | 4.83613900  | 0.45015100  |
| H | -1.45655100 | 2.17780300  | -0.54792500 | C         | -3.03391400 | 3.47771300  | 0.61862600  |

|           |             |             |             |            |             |             |             |
|-----------|-------------|-------------|-------------|------------|-------------|-------------|-------------|
| C         | -1.73710800 | 2.98280600  | 0.39537400  | C          | 0.55527600  | 1.19997000  | -1.20220900 |
| C         | -0.76102400 | 3.91776500  | -0.00699000 | C          | 1.08667000  | 2.50893200  | -1.16068800 |
| C         | -1.05592200 | 5.27126300  | -0.19461100 | C          | 1.41966200  | 0.17830100  | -1.62300400 |
| C         | -2.35227700 | 5.73702800  | 0.03623500  | C          | 2.40615100  | 2.76732200  | -1.51134000 |
| H         | -4.35142500 | 5.19115700  | 0.63905600  | H          | 0.44302100  | 3.32672900  | -0.85825100 |
| H         | -3.82577900 | 2.79858600  | 0.92965000  | C          | 2.75238000  | 0.42502800  | -1.97313900 |
| H         | -0.25828700 | 5.93964900  | -0.51167200 | H          | 1.03354600  | -0.83397700 | -1.69044400 |
| H         | -2.59244900 | 6.79011800  | -0.10003500 | C          | 3.25423900  | 1.72749300  | -1.91805100 |
| C         | 0.63917400  | 3.40878300  | -0.18512600 | H          | 2.80403900  | 3.77841600  | -1.47646000 |
| O         | 1.56846400  | 4.17093400  | -0.50886100 | H          | 3.37618100  | -0.40404800 | -2.29084700 |
| N         | 0.73040300  | 2.07514000  | 0.10807600  | O          | 4.54377900  | 2.08846000  | -2.23892300 |
| C         | 2.01266500  | 1.49919000  | 0.18319000  | C          | 5.41690400  | 1.07126200  | -2.68679500 |
| C         | 2.31926900  | 0.63408300  | 1.25460600  | H          | 6.37277600  | 1.55915000  | -2.89800800 |
| C         | 3.03718000  | 1.73547700  | -0.75279300 | H          | 5.57693300  | 0.29682300  | -1.92241300 |
| C         | 3.56883600  | 0.03865100  | 1.38693400  | H          | 5.05265400  | 0.59044700  | -3.60612800 |
| H         | 1.54988800  | 0.44523400  | 1.99901600  | C          | 0.29523600  | -1.68831400 | 0.87803300  |
| C         | 4.29840200  | 1.14376800  | -0.62792400 | C          | 0.44350200  | -0.65651800 | 1.54959600  |
| H         | 2.84578300  | 2.40555200  | -1.58122000 | C          | 0.47942500  | -2.97799800 | 0.27738600  |
| C         | 4.57394200  | 0.29020200  | 0.44512400  | C          | -0.42631400 | -3.48431800 | -0.67480900 |
| H         | 3.78571500  | -0.62489900 | 2.21989300  | C          | 1.59756800  | -3.76172000 | 0.63647300  |
| H         | 5.05480000  | 1.36177400  | -1.37538200 | C          | -0.21814400 | -4.73737600 | -1.24814200 |
| O         | 5.78236800  | -0.33434300 | 0.66333500  | H          | -1.28694200 | -2.88269600 | -0.94860900 |
| H         | -2.43149900 | 0.76395900  | 0.64622200  | C          | 1.79652300  | -5.01258700 | 0.05853500  |
| C         | 6.80814300  | -0.12434900 | -0.28538200 | H          | 2.30234500  | -3.37716500 | 1.36787300  |
| H         | 7.10035100  | 0.93378900  | -0.34989900 | C          | 0.89085800  | -5.50605800 | -0.88621600 |
| H         | 7.66797000  | -0.70623300 | 0.05915400  | H          | -0.92626400 | -5.11303900 | -1.98224700 |
| H         | 6.52158700  | -0.47371300 | -1.28803000 | H          | 2.66216400  | -5.60479500 | 0.34510900  |
| <b>15</b> |             |             |             | H          | 1.05007200  | -6.48236600 | -1.33703200 |
| -1 1      |             |             |             | C          | 0.87631700  | 0.35237500  | 2.47079400  |
| Ni        | -1.41823400 | -0.47720500 | 0.49400100  | C          | 0.31342300  | 1.64355400  | 2.47494300  |
| C         | -5.61338900 | 0.22296500  | -0.12736700 | C          | 1.88437800  | 0.04474200  | 3.41021200  |
| C         | -4.44361500 | -0.36772600 | 0.37167100  | C          | 0.74857900  | 2.59491100  | 3.39515300  |
| C         | -3.17175400 | 0.08741600  | -0.01651600 | H          | -0.45292000 | 1.88216600  | 1.74513500  |
| C         | -3.12664400 | 1.16835000  | -0.92027600 | C          | 2.31134800  | 1.00283300  | 4.32535900  |
| C         | -4.28653300 | 1.76880500  | -1.41765000 | H          | 2.32165100  | -0.94947800 | 3.41463400  |
| C         | -5.53888300 | 1.29470900  | -1.02170300 | C          | 1.74457700  | 2.28116200  | 4.32335600  |
| H         | -6.58629300 | -0.15368800 | 0.18666500  | H          | 0.30585400  | 3.58749200  | 3.38534200  |
| H         | -4.53201500 | -1.19612900 | 1.07071900  | H          | 3.08776100  | 0.75034700  | 5.04342200  |
| H         | -4.18429600 | 2.60080900  | -2.11045700 | H          | 2.07861300  | 3.02710800  | 5.04007900  |
| H         | -6.44787500 | 1.75342400  | -1.40690400 | H          | -2.11652200 | -1.41312800 | 1.41928700  |
| C         | -1.77386100 | 1.65033500  | -1.36098700 | <b>TS9</b> |             |             |             |
| O         | -1.65364300 | 2.60674600  | -2.14780900 | -1 1       |             |             |             |
| N         | -0.76975600 | 0.89579700  | -0.82347900 | Ni         | -0.98231400 | 0.59120900  | -0.24326200 |

|   |             |             |             |           |             |             |             |
|---|-------------|-------------|-------------|-----------|-------------|-------------|-------------|
| C | -3.86018800 | 3.74220000  | 0.28251100  | C         | 2.54565300  | -2.50604900 | 2.07305900  |
| C | -3.35466800 | 2.48797000  | -0.08455700 | H         | 1.50723900  | -0.62203800 | 1.91601300  |
| C | -1.97406400 | 2.23602800  | -0.09083300 | C         | 1.65432900  | -4.31381100 | 0.74278400  |
| C | -1.11592500 | 3.28461100  | 0.29283400  | H         | -0.09749000 | -3.84798900 | -0.42233800 |
| C | -1.61642800 | 4.53717000  | 0.66035200  | C         | 2.60819400  | -3.83499000 | 1.64595500  |
| C | -2.99185000 | 4.77305800  | 0.65214100  | H         | 3.28820600  | -2.12152000 | 2.76771900  |
| H | -4.93561200 | 3.91397700  | 0.27369500  | H         | 1.69584700  | -5.34583900 | 0.40141800  |
| H | -4.05501100 | 1.70276300  | -0.36172800 | H         | 3.39625300  | -4.49057500 | 2.00867400  |
| H | -0.90749600 | 5.30699300  | 0.95526000  | H         | -2.09895100 | 0.55982400  | -1.16638300 |
| H | -3.38418000 | 5.74835700  | 0.93329800  |           |             |             |             |
| C | 0.36003400  | 3.01767900  | 0.32057500  | <b>16</b> |             |             |             |
| O | 1.17344400  | 3.92579000  | 0.57283200  | -1 1      |             |             |             |
| N | 0.63423000  | 1.71676400  | 0.01698900  | Ni        | 0.09637400  | 0.64870500  | -0.17106300 |
| C | 1.97137400  | 1.32010400  | -0.17916200 | C         | -1.33172900 | 4.55730900  | -0.98882300 |
| C | 3.05712000  | 1.77752200  | 0.60360400  | C         | -1.37365500 | 3.18014800  | -0.72721700 |
| C | 2.26827800  | 0.39719200  | -1.19595200 | C         | -0.19151800 | 2.46395800  | -0.50941900 |
| C | 4.35212800  | 1.32276400  | 0.37611700  | C         | 1.03335800  | 3.15875600  | -0.56101100 |
| H | 2.87148900  | 2.50504900  | 1.38249200  | C         | 1.07576000  | 4.53170900  | -0.81846200 |
| C | 3.56612500  | -0.06438600 | -1.43184800 | C         | -0.11034500 | 5.23594900  | -1.03418900 |
| H | 1.45366100  | 0.03414800  | -1.81685000 | H         | -2.26037500 | 5.10133500  | -1.15543500 |
| C | 4.62177400  | 0.39800800  | -0.64114800 | H         | -2.33687700 | 2.67934300  | -0.68639900 |
| H | 5.17852700  | 1.67994200  | 0.98599600  | H         | 2.04490200  | 5.02404800  | -0.84623300 |
| H | 3.73390300  | -0.77979800 | -2.22983200 | H         | -0.08482900 | 6.30486000  | -1.23645300 |
| O | 5.93675700  | 0.01525200  | -0.78345700 | C         | 2.29334200  | 2.37346500  | -0.33876500 |
| C | 6.24261900  | -0.90347900 | -1.81400600 | O         | 3.41150500  | 2.91988200  | -0.37299000 |
| H | 7.32258700  | -1.06991300 | -1.76587700 | N         | 2.00469300  | 1.06120200  | -0.10979500 |
| H | 5.72842600  | -1.86531400 | -1.67473300 | C         | 2.97808900  | 0.08324900  | 0.11524400  |
| H | 5.98871200  | -0.50733200 | -2.80789200 | C         | 2.53811700  | -1.19353200 | 0.54235900  |
| C | -1.71476900 | -1.19542800 | -0.15562500 | C         | 4.37009900  | 0.24094100  | -0.06278700 |
| C | -0.48889900 | -1.25906700 | 0.22404700  | C         | 3.41742500  | -2.24542100 | 0.76105500  |
| C | -2.97416400 | -1.89726400 | -0.33459500 | H         | 1.47490200  | -1.35757100 | 0.71534400  |
| C | -4.00271500 | -1.41816600 | -1.16537700 | C         | 5.25950300  | -0.81574900 | 0.16043800  |
| C | -3.18751900 | -3.11576000 | 0.34673700  | H         | 4.74342200  | 1.20701800  | -0.37206500 |
| C | -5.19207900 | -2.12942700 | -1.31950200 | C         | 4.79441800  | -2.06765800 | 0.57165100  |
| H | -3.85324300 | -0.48330100 | -1.69805000 | H         | 3.05374100  | -3.21565000 | 1.08894000  |
| C | -4.38023500 | -3.81959800 | 0.19817600  | H         | 6.31989000  | -0.64017500 | 0.00823000  |
| H | -2.40745300 | -3.49779200 | 0.99878200  | O         | 5.58762900  | -3.16594800 | 0.81726400  |
| C | -5.38980700 | -3.33249400 | -0.63786400 | C         | 6.98484200  | -3.01267100 | 0.66456700  |
| H | -5.96867300 | -1.73896400 | -1.97288500 | H         | 7.39155300  | -2.24587400 | 1.33960800  |
| H | -4.52280200 | -4.75262100 | 0.73857500  | H         | 7.42787600  | -3.97925400 | 0.92031600  |
| H | -6.31947000 | -3.88371100 | -0.75498800 | H         | 7.26186000  | -2.75800300 | -0.36872900 |
| C | 0.56935600  | -2.12878400 | 0.70004000  | C         | -1.63224000 | -0.10561600 | -0.14658600 |
| C | 1.54439600  | -1.65895300 | 1.60039900  | C         | -1.55827900 | -1.27241800 | -0.84732300 |
| C | 0.64344900  | -3.47396400 | 0.27897800  | C         | -2.79317700 | 0.32473300  | 0.65516300  |

|           |             |             |             |   |             |             |             |
|-----------|-------------|-------------|-------------|---|-------------|-------------|-------------|
| C         | -4.08624000 | 0.40221800  | 0.09558400  | C | 4.00889200  | -2.03985400 | 0.92422000  |
| C         | -2.63600600 | 0.75134300  | 1.98990600  | H | 2.47192800  | -1.26954400 | 2.21646300  |
| C         | -5.17139600 | 0.86408400  | 0.84131300  | C | 4.28732000  | -2.73429900 | -0.25735100 |
| H         | -4.23035300 | 0.09646700  | -0.93724400 | H | 3.45277200  | -3.73402900 | -1.96402800 |
| C         | -3.72406900 | 1.19209600  | 2.74193100  | H | 4.80772200  | -1.67974600 | 1.56347400  |
| H         | -1.64216400 | 0.73460400  | 2.42984100  | O | 5.54973500  | -3.02306700 | -0.71594200 |
| C         | -4.99966600 | 1.25366400  | 2.17203000  | C | 6.64872000  | -2.59938600 | 0.06949100  |
| H         | -6.15561400 | 0.91680100  | 0.38056700  | H | 6.63797200  | -3.05445400 | 1.06993600  |
| H         | -3.57324900 | 1.50246400  | 3.77356300  | H | 7.54652100  | -2.92957200 | -0.46028300 |
| H         | -5.84545600 | 1.61091600  | 2.75456000  | H | 6.68011600  | -1.50600500 | 0.17596800  |
| C         | -2.41596400 | -2.47903800 | -0.83654900 | C | 0.60214700  | 0.69265600  | -0.18598000 |
| C         | -2.38867700 | -3.34018200 | -1.95268500 | C | 1.36933800  | 1.25869700  | 0.77389200  |
| C         | -3.23353100 | -2.85175800 | 0.25013300  | C | 0.67944900  | 1.04876100  | -1.61784500 |
| C         | -3.16179800 | -4.49952800 | -1.99902200 | C | 0.23586100  | 2.30875100  | -2.07707200 |
| H         | -1.75132800 | -3.08427200 | -2.79670600 | C | 1.12738600  | 0.12999400  | -2.59039100 |
| C         | -4.00356200 | -4.01261600 | 0.20630100  | C | 0.24500800  | 2.63379200  | -3.43392800 |
| H         | -3.25351500 | -2.23044200 | 1.13844200  | H | -0.10931600 | 3.03865200  | -1.34982100 |
| C         | -3.97839800 | -4.84263700 | -0.91874700 | C | 1.14822700  | 0.46130300  | -3.94536400 |
| H         | -3.12260200 | -5.13830300 | -2.87853700 | H | 1.47615200  | -0.84597400 | -2.26763900 |
| H         | -4.62193400 | -4.27521500 | 1.06180500  | C | 0.70353300  | 1.71342300  | -4.37988200 |
| H         | -4.57952400 | -5.74804200 | -0.94858300 | H | -0.10190900 | 3.61515800  | -3.75245600 |
| H         | -0.71293100 | -1.37746100 | -1.53724100 | H | 1.51096800  | -0.26753100 | -4.66755700 |
| <b>17</b> |             |             |             | H | 0.71297300  | 1.96650100  | -5.43753200 |
| -1 1      |             |             |             | C | 2.49128900  | 2.22084200  | 0.69589300  |
| Ni        | -0.88819500 | -0.49655600 | 0.45459000  | C | 2.82543100  | 2.95317700  | 1.85526900  |
| C         | -4.42854400 | -2.21234300 | 2.35107300  | C | 3.28580900  | 2.43704300  | -0.44969800 |
| C         | -3.63943200 | -1.31750800 | 1.61292600  | C | 3.87850000  | 3.86630200  | 1.87012300  |
| C         | -2.28517500 | -1.57875800 | 1.35269700  | H | 2.23622800  | 2.79879000  | 2.75730100  |
| C         | -1.76464100 | -2.77606100 | 1.86914600  | C | 4.34029600  | 3.34918500  | -0.43568500 |
| C         | -2.53364700 | -3.68098300 | 2.60442200  | H | 3.08591400  | 1.86989000  | -1.35095100 |
| C         | -3.87923500 | -3.39774400 | 2.84904600  | C | 4.64319400  | 4.07574000  | 0.71971800  |
| H         | -5.47767400 | -1.98298100 | 2.53608300  | H | 4.10161100  | 4.41648000  | 2.78209600  |
| H         | -4.10578100 | -0.40696600 | 1.23891800  | H | 4.93550200  | 3.48777400  | -1.33601600 |
| H         | -2.06551400 | -4.59117500 | 2.97327600  | H | 5.46673900  | 4.78601500  | 0.72544300  |
| H         | -4.49385400 | -4.09119600 | 3.42005900  | H | 1.15123100  | 0.97790100  | 1.80752000  |
| C         | -0.32270000 | -3.03871500 | 1.57776800  | C | -2.10727100 | 1.22297800  | 0.30222100  |
| O         | 0.24853600  | -4.08278800 | 1.92721700  | C | -2.34532000 | 0.48068200  | -0.66853600 |
| N         | 0.25591700  | -2.00305700 | 0.88912200  | C | -2.15389800 | 2.30651500  | 1.24176800  |
| C         | 1.60883700  | -2.22966100 | 0.50491100  | C | -1.75538000 | 2.13773400  | 2.58209800  |
| C         | 1.91093300  | -2.93632600 | -0.67219300 | C | -2.62416800 | 3.57010800  | 0.82494400  |
| C         | 2.68110800  | -1.80182700 | 1.29349700  | C | -1.83243800 | 3.20197000  | 3.47746100  |
| C         | 3.22604300  | -3.18558500 | -1.05350100 | H | -1.39737800 | 1.16629000  | 2.90596400  |
| H         | 1.09152600  | -3.29705400 | -1.28882000 | C | -2.69399400 | 4.62890500  | 1.72692700  |
|           |             |             |             | H | -2.92712000 | 3.70942400  | -0.20854700 |

|             |             |             |             |   |             |             |             |
|-------------|-------------|-------------|-------------|---|-------------|-------------|-------------|
| C           | -2.29858400 | 4.45027200  | 3.05563100  | H | 5.75516900  | -4.39324300 | -0.94248600 |
| H           | -1.52542400 | 3.05552500  | 4.50977500  | H | 6.16473000  | -4.46851600 | -2.67701400 |
| H           | -3.05541900 | 5.59737800  | 1.39049400  | H | 5.81297700  | -2.89397400 | -1.91629700 |
| H           | -2.35227300 | 5.27873300  | 3.75716500  | C | 1.05702700  | 0.83278500  | 0.42259000  |
| C           | -2.91761200 | -0.07401100 | -1.86311900 | C | 1.72508000  | 1.02799400  | 1.58797300  |
| C           | -3.59617800 | 0.77796300  | -2.76087600 | C | 1.53243300  | 1.30058400  | -0.89945400 |
| C           | -2.83147400 | -1.44741800 | -2.16196400 | C | 1.91976000  | 2.64216200  | -1.10981900 |
| C           | -4.17763300 | 0.26352000  | -3.91613000 | C | 1.53838800  | 0.44661600  | -2.02227800 |
| H           | -3.65526900 | 1.84008900  | -2.54372400 | C | 2.31076800  | 3.09941400  | -2.36778700 |
| C           | -3.41891600 | -1.95216200 | -3.31994200 | H | 1.90620800  | 3.32968700  | -0.27005200 |
| H           | -2.30718600 | -2.10243600 | -1.47520500 | C | 1.94646700  | 0.89957900  | -3.27700800 |
| C           | -4.09295400 | -1.10272100 | -4.20084700 | H | 1.22971300  | -0.58612900 | -1.89937100 |
| H           | -4.69626200 | 0.93219000  | -4.59866900 | C | 2.33411900  | 2.22964200  | -3.46119800 |
| H           | -3.34645300 | -3.01504200 | -3.53507200 | H | 2.59717700  | 4.14173700  | -2.49344900 |
| H           | -4.54593400 | -1.50097400 | -5.10521400 | H | 1.95340400  | 0.20793300  | -4.11686400 |
|             |             |             |             | H | 2.64046000  | 2.58441700  | -4.44259200 |
| <b>TS10</b> |             |             |             | C | 3.09257800  | 1.52652300  | 1.86608000  |
| -1 1        |             |             |             | C | 3.36650000  | 2.06693000  | 3.14032400  |
| Ni          | -0.68161500 | -0.08242700 | 0.58348100  | C | 4.17283200  | 1.43402100  | 0.96268400  |
| C           | -3.72198800 | -0.63516100 | 3.54387600  | C | 4.63768400  | 2.52263200  | 3.48756100  |
| C           | -3.04721900 | -0.00674200 | 2.49013300  | H | 2.55770900  | 2.12889800  | 3.86627000  |
| C           | -2.21451300 | -0.74392800 | 1.63588100  | C | 5.44499200  | 1.88641500  | 1.30981100  |
| C           | -2.03852000 | -2.11732100 | 1.88555300  | H | 4.01355800  | 0.98841300  | -0.01273300 |
| C           | -2.73486500 | -2.74513900 | 2.91932700  | C | 5.68851800  | 2.43939800  | 2.57087000  |
| C           | -3.58722500 | -2.01032000 | 3.74640800  | H | 4.80879900  | 2.93856400  | 4.47838100  |
| H           | -4.36735000 | -0.04738100 | 4.19352900  | H | 6.25639600  | 1.79705600  | 0.59037400  |
| H           | -3.19376100 | 1.05609900  | 2.32188200  | H | 6.68306300  | 2.78878000  | 2.83775000  |
| H           | -2.56152800 | -3.80678200 | 3.07706500  | H | 1.20486800  | 0.74616800  | 2.50732200  |
| H           | -4.12769900 | -2.50190900 | 4.55208900  | C | -1.77468200 | 1.36442100  | -0.05538400 |
| C           | -0.96758300 | -2.85742000 | 1.13863000  | C | -2.49712900 | 0.28374700  | -0.12832700 |
| O           | -0.94172100 | -4.10004800 | 1.10324300  | C | -1.75578400 | 2.75264500  | -0.48676400 |
| N           | -0.05917600 | -1.99028800 | 0.62039800  | C | -1.11869600 | 3.73064900  | 0.30149000  |
| C           | 1.02668200  | -2.55243600 | -0.09541100 | C | -2.38846200 | 3.16913500  | -1.67729300 |
| C           | 0.82768400  | -3.32518000 | -1.25787300 | C | -1.13605700 | 5.07464700  | -0.07037300 |
| C           | 2.34768000  | -2.33951200 | 0.31832200  | H | -0.60869900 | 3.41789100  | 1.20718900  |
| C           | 1.89928600  | -3.84603800 | -1.97336400 | C | -2.39058300 | 4.51072800  | -2.05390800 |
| H           | -0.18608100 | -3.51649800 | -1.59543300 | H | -2.86953500 | 2.42831000  | -2.30902200 |
| C           | 3.43619100  | -2.85429000 | -0.39548700 | C | -1.77105000 | 5.47188900  | -1.24941700 |
| H           | 2.52532400  | -1.75272100 | 1.21295300  | H | -0.64361700 | 5.81220500  | 0.55903700  |
| C           | 3.21538500  | -3.61225000 | -1.54895900 | H | -2.87776900 | 4.80730600  | -2.97993800 |
| H           | 1.73836200  | -4.43971200 | -2.86950200 | H | -1.77802500 | 6.51879200  | -1.54292800 |
| H           | 4.44122800  | -2.65588500 | -0.03829800 | C | -3.69869600 | -0.29650000 | -0.72209500 |
| O           | 4.20384700  | -4.16547500 | -2.32652600 | C | -4.81795500 | 0.51961000  | -0.98042800 |
| C           | 5.54718000  | -3.96029900 | -1.93125500 | C | -3.76228100 | -1.65450700 | -1.08285200 |

|           |             |             |             |    |             |             |             |
|-----------|-------------|-------------|-------------|----|-------------|-------------|-------------|
| C         | -5.95774100 | -0.00688100 | -1.58669200 | H  | -0.71329300 | -7.46263200 | 0.56640000  |
| H         | -4.78698900 | 1.56794300  | -0.69840800 | C  | -1.80485800 | -0.14497500 | -2.26023800 |
| C         | -4.90288900 | -2.17550600 | -1.69081300 | O  | -2.81102900 | -0.24100500 | -2.98933700 |
| H         | -2.91121300 | -2.29643100 | -0.88108500 | N  | -1.67236800 | 0.59949100  | -1.13375900 |
| C         | -6.00600400 | -1.35631100 | -1.94632800 | Ni | 0.05181800  | 0.54678700  | -0.25120300 |
| H         | -6.81263900 | 0.63886100  | -1.77346700 | C  | -2.73469400 | 1.36264000  | -0.60302100 |
| H         | -4.92964700 | -3.22746000 | -1.96385000 | C  | -3.99840300 | 1.55880800  | -1.19839000 |
| H         | -6.89599600 | -1.76680000 | -2.41671600 | C  | -2.51270400 | 2.01912300  | 0.63171000  |
| <b>18</b> |             |             |             | C  | -4.97125100 | 2.36927700  | -0.60101000 |
| -1 1      |             |             |             | H  | -4.21003000 | 1.06813900  | -2.13667100 |
| C         | 0.82895100  | -1.36032100 | -4.68756700 | C  | -3.47570800 | 2.82034100  | 1.22877800  |
| C         | -0.21793500 | -0.67691200 | -4.07539200 | H  | -1.55690300 | 1.87717000  | 1.13241300  |
| C         | -0.56319300 | -0.89522000 | -2.73045100 | C  | -4.72131300 | 3.00886000  | 0.61467000  |
| C         | 0.14737900  | -1.87271500 | -1.98855000 | H  | -5.92439900 | 2.48733900  | -1.10699200 |
| C         | 1.16971500  | -2.58908000 | -2.64299700 | H  | -3.27912400 | 3.30862300  | 2.17961500  |
| C         | 1.52580000  | -2.33136400 | -3.96430900 | O  | -5.60949700 | 3.82325100  | 1.27812500  |
| H         | 1.08615600  | -1.15075100 | -5.72323900 | C  | -6.87371500 | 4.03802800  | 0.68104900  |
| H         | -0.80523400 | 0.03890500  | -4.64317200 | H  | -7.42371400 | 4.69773700  | 1.35795600  |
| H         | 1.69777100  | -3.35973500 | -2.08775700 | H  | -6.78720700 | 4.52744000  | -0.29984100 |
| H         | 2.33729200  | -2.88873300 | -4.42685700 | H  | -7.43728400 | 3.10180000  | 0.56188500  |
| C         | -0.14339600 | -2.19472900 | -0.55373800 | H  | 0.78443200  | 2.68333400  | -0.39448900 |
| C         | -0.19825800 | -1.19956900 | 0.36632500  | C  | 1.77916800  | 2.29361600  | -0.10629800 |
| C         | -0.65087000 | -1.35276300 | 1.76706600  | C  | 1.81780500  | 0.99107400  | 0.26852300  |
| C         | 0.14986600  | -0.96928200 | 2.86127100  | C  | 2.97063600  | 0.27498200  | 0.83226800  |
| C         | -1.94613500 | -1.83868500 | 2.04187100  | C  | 3.46016000  | -0.90431000 | 0.23566600  |
| C         | -0.31248400 | -1.09582500 | 4.17065100  | C  | 3.58011900  | 0.70418100  | 2.03112600  |
| H         | 1.14544700  | -0.58048400 | 2.67570000  | C  | 4.52771800  | -1.60505100 | 0.79760400  |
| C         | -2.41227300 | -1.95048900 | 3.35192000  | H  | 2.99545000  | -1.25945400 | -0.67915800 |
| H         | -2.58844900 | -2.11975300 | 1.21272800  | C  | 4.63386400  | -0.00940300 | 2.60208700  |
| C         | -1.59713800 | -1.58472700 | 4.42560900  | H  | 3.21251800  | 1.60668000  | 2.51234100  |
| H         | 0.33346200  | -0.80509600 | 4.99642900  | C  | 5.11865800  | -1.16639500 | 1.98618800  |
| H         | -3.41832200 | -2.32273000 | 3.53269000  | H  | 4.89315800  | -2.50609300 | 0.30978000  |
| H         | -1.95931100 | -1.67317800 | 5.44717700  | H  | 5.07986400  | 0.34305900  | 3.52974900  |
| C         | -0.30098500 | -3.64788600 | -0.22922200 | H  | 5.94151900  | -1.72206800 | 2.42940000  |
| C         | -1.09655300 | -4.48065000 | -1.04039800 | C  | 2.81965800  | 3.33196200  | -0.25668900 |
| C         | 0.35598300  | -4.23867300 | 0.86609000  | C  | 2.42964100  | 4.68521200  | -0.32231900 |
| C         | -1.24815600 | -5.83744600 | -0.75522700 | C  | 4.19548500  | 3.04489400  | -0.37273800 |
| H         | -1.60583500 | -4.05159300 | -1.89898700 | C  | 3.36718600  | 5.70687200  | -0.46711200 |
| C         | 0.20615400  | -5.59630300 | 1.15162900  | H  | 1.37194100  | 4.93167200  | -0.25276400 |
| H         | 0.99778300  | -3.62435900 | 1.48962100  | C  | 5.13195300  | 4.06654600  | -0.51931600 |
| C         | -0.59852800 | -6.40423000 | 0.34464700  | H  | 4.52807400  | 2.01324300  | -0.35994300 |
| H         | -1.87707400 | -6.45309300 | -1.39464700 | C  | 4.72774200  | 5.40427200  | -0.56194400 |
| H         | 0.72832100  | -6.02526800 | 2.00406200  | H  | 3.03389900  | 6.74152900  | -0.50810300 |
|           |             |             |             | H  | 6.18630800  | 3.81398600  | -0.60839300 |



|             |             |             |             |           |             |             |             |
|-------------|-------------|-------------|-------------|-----------|-------------|-------------|-------------|
| H           | 5.46213800  | 6.19780600  | -0.67615600 | C         | 1.90037200  | -2.73818000 | 0.18618200  |
|             |             |             |             | C         | 4.61790300  | -2.49186900 | -0.39135600 |
| <b>TS11</b> |             |             |             | H         | 4.05385900  | -0.76802400 | -1.53930900 |
| -1 1        |             |             |             | C         | 2.80676200  | -3.65292200 | 0.71232600  |
| C           | -0.29710500 | 1.86970300  | -4.89703200 | H         | 0.84138000  | -2.83084200 | 0.41059900  |
| C           | 0.29113600  | 0.75197700  | -4.32988600 | C         | 4.17304400  | -3.53850600 | 0.42660800  |
| C           | 0.64595800  | 0.71496500  | -2.96642800 | H         | 5.66906600  | -2.37825600 | -0.63238700 |
| C           | 0.43748000  | 1.86265100  | -2.13727500 | H         | 2.47097900  | -4.46661400 | 1.34846200  |
| C           | -0.14753500 | 3.00122500  | -2.75861800 | O         | 4.98615000  | -4.48813500 | 0.98568200  |
| C           | -0.51555300 | 3.00363900  | -4.09283000 | C         | 6.37759100  | -4.40738700 | 0.72783800  |
| H           | -0.58466000 | 1.87092200  | -5.94538000 | H         | 6.83427200  | -5.24121700 | 1.26721000  |
| H           | 0.50201200  | -0.13082600 | -4.92524300 | H         | 6.60154400  | -4.50952900 | -0.34299000 |
| H           | -0.33249600 | 3.88392600  | -2.15531300 | H         | 6.80805000  | -3.46605400 | 1.09626400  |
| H           | -0.98421300 | 3.88953400  | -4.51674000 | H         | -2.35995800 | -2.47107600 | -1.01403000 |
| C           | 0.81507300  | 1.86370000  | -0.73913800 | C         | -2.92622900 | -1.76755900 | -0.39404200 |
| C           | 0.88502900  | 0.63712100  | -0.04979500 | C         | -2.23736300 | -0.70625600 | 0.11517200  |
| C           | 1.56982200  | 0.52689700  | 1.27525700  | C         | -2.83688400 | 0.26818700  | 1.05131800  |
| C           | 0.92902200  | -0.05547700 | 2.38086200  | C         | -3.06995400 | 1.60701900  | 0.67223800  |
| C           | 2.88873900  | 0.98829400  | 1.44207200  | C         | -3.13442200 | -0.08605700 | 2.38557400  |
| C           | 1.57150900  | -0.14970500 | 3.61640400  | C         | -3.59417800 | 2.53498200  | 1.57307900  |
| H           | -0.08559500 | -0.42152200 | 2.26086900  | H         | -2.83142500 | 1.91217700  | -0.34324700 |
| C           | 3.53708000  | 0.88301100  | 2.67173500  | C         | -3.64252200 | 0.84687200  | 3.29016900  |
| H           | 3.40134900  | 1.43803000  | 0.59729500  | H         | -2.96459600 | -1.11164700 | 2.70545700  |
| C           | 2.87941200  | 0.31591800  | 3.76647000  | C         | -3.88201700 | 2.16436600  | 2.89043900  |
| H           | 1.04896800  | -0.59196200 | 4.46138900  | H         | -3.76989200 | 3.55765900  | 1.24536200  |
| H           | 4.55784800  | 1.24392900  | 2.77564200  | H         | -3.85911500 | 0.54007800  | 4.31179200  |
| H           | 3.38371500  | 0.23556200  | 4.72672400  | H         | -4.28007400 | 2.89171800  | 3.59396900  |
| C           | 1.04586100  | 3.16304700  | -0.04897000 | C         | -4.34260800 | -2.18184200 | -0.28389500 |
| C           | 1.88699700  | 4.14536200  | -0.61501500 | C         | -4.67954900 | -3.50525700 | -0.64337500 |
| C           | 0.43404200  | 3.47343300  | 1.18270200  | C         | -5.40254000 | -1.33977800 | 0.11761300  |
| C           | 2.11577700  | 5.36519000  | 0.02142900  | C         | -5.99044900 | -3.97438100 | -0.58368600 |
| H           | 2.37428200  | 3.93830400  | -1.56421100 | H         | -3.88639600 | -4.17378200 | -0.97319700 |
| C           | 0.66929500  | 4.68942400  | 1.82477200  | C         | -6.71464100 | -1.80769200 | 0.17497500  |
| H           | -0.24420800 | 2.75441500  | 1.62975800  | H         | -5.19758300 | -0.30741600 | 0.37312500  |
| C           | 1.51131100  | 5.64464400  | 1.25043100  | C         | -7.02156100 | -3.12743300 | -0.16907800 |
| H           | 2.77657200  | 6.09589100  | -0.44057500 | H         | -6.20781000 | -5.00276000 | -0.86505400 |
| H           | 0.17866800  | 4.89475800  | 2.77373400  | H         | -7.50713700 | -1.12978900 | 0.48547700  |
| H           | 1.69031400  | 6.59392000  | 1.74992100  | H         | -8.04711200 | -3.48593600 | -0.12325500 |
| C           | 1.38911100  | -0.48179000 | -2.51388100 |           |             |             |             |
| O           | 1.96505800  | -1.23500100 | -3.30840400 | <b>P2</b> |             |             |             |
| N           | 1.40308500  | -0.71338300 | -1.12752000 | 0 1       |             |             |             |
| Ni          | -0.40499500 | -0.67110400 | -0.48571600 | C         | 3.60956200  | -1.98648200 | -0.10913700 |
| C           | 2.33247900  | -1.68250400 | -0.62939300 | C         | 2.24178500  | -1.63539000 | -0.03317500 |
| C           | 3.70064100  | -1.57434600 | -0.90491300 | C         | 1.29107700  | -2.68075300 | 0.04359100  |

|   |             |             |             |            |             |             |             |
|---|-------------|-------------|-------------|------------|-------------|-------------|-------------|
| C | 1.70328700  | -4.02436900 | 0.04659300  | H          | -0.23632900 | 1.59270500  | -2.06467800 |
| C | 3.04879100  | -4.34551400 | -0.02676100 | C          | -1.04368500 | 4.04641700  | 0.14946900  |
| C | 4.00173100  | -3.31596600 | -0.10688900 | H          | -0.89517000 | 3.87030400  | 2.29442500  |
| H | 4.35712800  | -1.20303100 | -0.16873500 | H          | -1.07419700 | 3.92032200  | -2.00349500 |
| H | 0.93890200  | -4.79192800 | 0.10675600  | H          | -1.41012500 | 5.06916000  | 0.17649400  |
| H | 3.36528100  | -5.38479200 | -0.02400500 |            |             |             |             |
| H | 5.05908500  | -3.56157500 | -0.16589800 | <b>15'</b> |             |             |             |
| C | -0.14862000 | -2.39830200 | 0.11305100  | -1 1       |             |             |             |
| O | -1.01435200 | -3.26848400 | 0.17266900  | Ni         | 0.26732500  | 0.00943700  | 0.03102500  |
| N | -0.50023100 | -1.03433800 | 0.09928200  | C          | 2.65331600  | 2.51975200  | 2.69864300  |
| C | -1.92066800 | -0.75350700 | 0.12304500  | C          | 2.36525500  | 1.54830200  | 1.72897600  |
| C | -2.64041400 | -0.71228000 | -1.06736800 | C          | 1.05791700  | 1.33882000  | 1.26548400  |
| C | -2.58416800 | -0.56781700 | 1.33923800  | C          | 0.05168800  | 2.13769800  | 1.83582900  |
| C | -4.01524200 | -0.46799100 | -1.06044600 | C          | 0.31745500  | 3.10867000  | 2.80541600  |
| H | -2.12821700 | -0.87843500 | -2.01048900 | C          | 1.63047800  | 3.30675800  | 3.23771000  |
| C | -3.95016000 | -0.32092400 | 1.35854700  | H          | 3.67994000  | 2.66467800  | 3.03454700  |
| H | -2.02776600 | -0.62262300 | 2.26993100  | H          | 3.18780100  | 0.94998400  | 1.33670400  |
| C | -4.67614200 | -0.26808100 | 0.15813300  | H          | -0.50859500 | 3.69001200  | 3.20919700  |
| H | -4.55304600 | -0.43904000 | -2.00097800 | H          | 1.85579800  | 4.06019300  | 3.99037300  |
| H | -4.47884200 | -0.17212200 | 2.29489100  | C          | -1.34710500 | 1.88105800  | 1.36852000  |
| O | -6.00921400 | -0.02108000 | 0.28414700  | O          | -2.31346400 | 2.53772200  | 1.78617500  |
| C | -6.80585700 | 0.00513400  | -0.89394900 | N          | -1.39556800 | 0.86579400  | 0.44126400  |
| H | -7.82794200 | 0.19567600  | -0.55977300 | C          | -2.65853200 | 0.52488900  | -0.10394000 |
| H | -6.49633500 | 0.80869400  | -1.57515300 | C          | -2.81825100 | 0.38447200  | -1.49555000 |
| H | -6.77465500 | -0.95490100 | -1.42506800 | C          | -3.79030200 | 0.30130300  | 0.69517900  |
| C | 1.78326500  | -0.25687300 | -0.02192700 | C          | -4.04004300 | 0.03343800  | -2.05862200 |
| C | 0.44148600  | 0.00561400  | 0.04620200  | H          | -1.95621100 | 0.54967700  | -2.13424300 |
| C | 2.79079600  | 0.85215700  | -0.07555000 | C          | -5.02501200 | -0.05451500 | 0.14145800  |
| C | 3.32548500  | 1.39375600  | 1.10330700  | H          | -3.70524300 | 0.41127500  | 1.76987500  |
| C | 3.25378000  | 1.34172200  | -1.30635900 | C          | -5.15751600 | -0.18989400 | -1.24370400 |
| C | 4.28277400  | 2.40835200  | 1.05365100  | H          | -4.14802700 | -0.07263900 | -3.13490500 |
| H | 2.98606300  | 1.01704400  | 2.06449700  | H          | -5.86839300 | -0.22314800 | 0.80321800  |
| C | 4.21162300  | 2.35591000  | -1.35808100 | O          | -6.32191000 | -0.53230800 | -1.89339300 |
| H | 2.85752200  | 0.92482400  | -2.22858100 | C          | -7.46343600 | -0.79541400 | -1.10163700 |
| C | 4.72830700  | 2.89290700  | -0.17751600 | H          | -7.77170600 | 0.08321100  | -0.51651100 |
| H | 4.68116500  | 2.81891400  | 1.97796900  | H          | -8.26600400 | -1.05322700 | -1.79852300 |
| H | 4.55406800  | 2.72534900  | -2.32131900 | H          | -7.30273000 | -1.64010900 | -0.41642700 |
| H | 5.47394100  | 3.68279100  | -0.21657700 | C          | 2.11995400  | -0.40151700 | -0.75348900 |
| C | -0.09153100 | 1.40571500  | 0.07863500  | C          | 1.69977200  | -1.40911900 | -0.13965900 |
| C | -0.28136000 | 2.06197000  | 1.30283800  | C          | 2.93665000  | 0.44365100  | -1.57716600 |
| C | -0.38317300 | 2.08903700  | -1.10971900 | C          | 4.18982600  | -0.02566300 | -2.02985600 |
| C | -0.75503800 | 3.37359900  | 1.33798000  | C          | 2.51332700  | 1.72751500  | -1.97339200 |
| H | -0.05313000 | 1.54343700  | 2.22972000  | C          | 4.98771800  | 0.76645200  | -2.85048700 |
| C | -0.85556800 | 3.40130700  | -1.07397600 | H          | 4.52486800  | -1.01520500 | -1.73256300 |

|             |             |             |             |            |             |             |             |
|-------------|-------------|-------------|-------------|------------|-------------|-------------|-------------|
| C           | 3.32058700  | 2.51431500  | -2.79236600 | H          | -5.28320400 | 3.86405000  | -1.03941200 |
| H           | 1.55377900  | 2.09379600  | -1.62476700 | H          | -4.27692600 | 5.89372300  | -0.00150300 |
| C           | 4.55793600  | 2.04040900  | -3.23560700 | C          | -2.28078500 | -0.87692900 | -1.22049900 |
| H           | 5.94936900  | 0.38910400  | -3.18986000 | C          | -1.41270700 | -1.53451300 | -2.11208300 |
| H           | 2.97923300  | 3.50361800  | -3.08594600 | C          | -3.66810500 | -1.01983700 | -1.40971500 |
| H           | 5.18322300  | 2.65734200  | -3.87594200 | C          | -1.91741000 | -2.29027300 | -3.16810900 |
| C           | 1.68774100  | -2.74259900 | 0.39797800  | H          | -0.34058600 | -1.43945300 | -1.97050900 |
| C           | 0.52726000  | -3.29958600 | 0.96814600  | C          | -4.16994400 | -1.77862600 | -2.46766900 |
| C           | 2.86628500  | -3.51920700 | 0.36199300  | H          | -4.35156100 | -0.54762100 | -0.71022200 |
| C           | 0.54496700  | -4.59813200 | 1.47364800  | C          | -3.29766500 | -2.41501400 | -3.35315100 |
| H           | -0.37649000 | -2.70021900 | 0.99451200  | H          | -1.22911700 | -2.78526900 | -3.84870100 |
| C           | 2.87595600  | -4.81376600 | 0.87365300  | H          | -5.24553500 | -1.87728100 | -2.59430500 |
| H           | 3.76908900  | -3.09450900 | -0.06781500 | H          | -3.68866300 | -3.00773900 | -4.17640200 |
| C           | 1.71509900  | -5.36032600 | 1.43054600  | N          | 1.55763900  | -0.64904200 | 0.63383300  |
| H           | -0.36100200 | -5.01505400 | 1.90619700  | C          | 2.81586700  | -0.11883600 | 0.27825700  |
| H           | 3.79184900  | -5.39859400 | 0.83705600  | C          | 3.65037000  | -0.66619300 | -0.71538100 |
| H           | 1.72479700  | -6.37117300 | 1.83030000  | C          | 3.28712800  | 1.03781400  | 0.93656200  |
| H           | -0.48241200 | -1.04371900 | -0.80049000 | C          | 4.88110200  | -0.08644900 | -1.04381800 |
|             |             |             |             | H          | 3.33692700  | -1.56582800 | -1.22733900 |
| <b>TS9'</b> |             |             |             | C          | 4.50991400  | 1.61534600  | 0.62016800  |
| -1 1        |             |             |             | H          | 2.66154500  | 1.48120200  | 1.70325300  |
| C           | -1.40479300 | -3.87740800 | 2.37819400  | C          | 5.32150500  | 1.06007400  | -0.37802100 |
| C           | -0.23171600 | -3.60200500 | 1.67201700  | H          | 5.48224700  | -0.54494200 | -1.82256800 |
| C           | -0.01965900 | -2.34173600 | 1.10880200  | H          | 4.85477600  | 2.50509400  | 1.14064200  |
| C           | -1.00798200 | -1.34019600 | 1.21208600  | O          | 6.51232100  | 1.70649800  | -0.62299500 |
| C           | -2.16217700 | -1.61381700 | 1.96061500  | C          | 7.34851400  | 1.17833200  | -1.63293300 |
| C           | -2.35807200 | -2.87081100 | 2.54465400  | H          | 7.67569100  | 0.15391500  | -1.40334200 |
| H           | -1.56281900 | -4.86096300 | 2.81504400  | H          | 6.85764300  | 1.18081100  | -2.61679200 |
| H           | 0.56119900  | -4.33963200 | 1.57740400  | H          | 8.22714700  | 1.82825900  | -1.67545100 |
| H           | -2.92685000 | -0.85007000 | 2.07065300  | Ni         | -0.10511700 | 0.38982900  | 0.87574800  |
| H           | -3.26357100 | -3.06296200 | 3.11673000  | H          | 0.51386600  | 1.74724000  | 1.18202800  |
| C           | 1.34397600  | -1.99341600 | 0.57669500  |            |             |             |             |
| O           | 2.13862400  | -2.88813900 | 0.23316200  | <b>16'</b> |             |             |             |
| C           | -1.74765800 | -0.04013300 | -0.14494100 | -1 1       |             |             |             |
| C           | -1.76789500 | 1.16176100  | 0.36632800  | Ni         | -0.37287400 | -1.21908500 | -0.11289600 |
| C           | -2.45651000 | 2.43532400  | 0.26045500  | C          | 1.93520900  | 4.07248800  | -1.45901400 |
| C           | -1.90564200 | 3.59531400  | 0.84179300  | C          | 2.42173200  | 2.84073900  | -1.03793800 |
| C           | -3.69000800 | 2.56290800  | -0.41718200 | C          | 1.60284100  | 1.87370800  | -0.41183300 |
| C           | -2.55013200 | 4.82675600  | 0.74166800  | C          | 0.24049500  | 2.19369900  | -0.19739800 |
| H           | -0.96078500 | 3.50174100  | 1.36702000  | C          | -0.22681000 | 3.45673000  | -0.61074900 |
| C           | -4.33535900 | 3.79381300  | -0.51030300 | C          | 0.59100700  | 4.38475800  | -1.24724900 |
| H           | -4.13357000 | 1.68773500  | -0.88058400 | H          | 2.59997700  | 4.77992900  | -1.94972700 |
| C           | -3.77011000 | 4.93425000  | 0.06866300  | H          | 3.46690700  | 2.60148600  | -1.20849000 |
| H           | -2.09988700 | 5.70619100  | 1.19633500  | H          | -1.26436000 | 3.70967600  | -0.41115100 |

|   |             |             |             |           |             |             |             |
|---|-------------|-------------|-------------|-----------|-------------|-------------|-------------|
| H | 0.18537000  | 5.34357500  | -1.56151300 | <b>19</b> |             |             |             |
| C | -0.84283200 | 1.42157800  | 0.55380500  | -1 1      |             |             |             |
| O | -1.24142500 | 1.95638700  | 1.59872900  | Ni        | -0.03580300 | 0.64643000  | 0.00388000  |
| N | -1.44445700 | 0.37266200  | -0.10595600 | C         | -1.87094200 | 4.44788900  | 0.79875900  |
| C | -2.85214400 | 0.21581900  | 0.00225300  | C         | -1.75213100 | 3.05526700  | 0.68387600  |
| C | -3.50701300 | -0.38457600 | -1.09805800 | C         | -0.52215700 | 2.44576600  | 0.38581300  |
| C | -3.66767800 | 0.65443600  | 1.06003200  | C         | 0.58864100  | 3.30437000  | 0.22725200  |
| C | -4.88453100 | -0.52961500 | -1.14607400 | C         | 0.47476500  | 4.69454600  | 0.31962400  |
| H | -2.89720900 | -0.73905500 | -1.92330300 | C         | -0.76174400 | 5.27546400  | 0.60535600  |
| C | -5.06331700 | 0.51634500  | 1.01555800  | H         | -2.83968800 | 4.88619300  | 1.03708400  |
| H | -3.20405100 | 1.11068100  | 1.92231700  | H         | -2.63939700 | 2.44520100  | 0.82277800  |
| C | -5.68259100 | -0.07460300 | -0.08505100 | H         | 1.36994900  | 5.29565700  | 0.17779000  |
| H | -5.36732300 | -0.99002400 | -2.00426200 | H         | -0.85870000 | 6.35665700  | 0.68633500  |
| H | -5.64590500 | 0.87134400  | 1.85997300  | C         | 1.93247900  | 2.67098700  | 0.02774300  |
| O | -7.04022000 | -0.25649400 | -0.22727800 | O         | 2.96227500  | 3.35888600  | -0.10742100 |
| C | -7.87323200 | 0.18744200  | 0.82468300  | N         | 1.83860100  | 1.31248300  | 0.09149100  |
| H | -8.89863400 | -0.04432400 | 0.52252600  | C         | 2.99930100  | 0.52787600  | 0.18224000  |
| H | -7.65658200 | -0.33206600 | 1.76933600  | C         | 2.96394100  | -0.64754200 | 0.96722600  |
| H | -7.78763100 | 1.27139800  | 0.98985500  | C         | 4.21881800  | 0.81872400  | -0.46325700 |
| C | 2.20615200  | 0.55166100  | -0.09396000 | C         | 4.06682200  | -1.48277400 | 1.09394300  |
| C | 1.43889500  | -0.55113900 | -0.11237600 | H         | 2.04388000  | -0.89114500 | 1.48983200  |
| C | 3.66305600  | 0.51822900  | 0.26542200  | C         | 5.33482700  | -0.01819700 | -0.33972500 |
| C | 4.58442100  | -0.34196300 | -0.35523000 | H         | 4.29559000  | 1.72527900  | -1.04840800 |
| C | 4.14021700  | 1.35036500  | 1.29764400  | C         | 5.26803800  | -1.17637500 | 0.43867000  |
| C | 5.92146800  | -0.38224800 | 0.04728700  | H         | 4.02027800  | -2.37790800 | 1.70924800  |
| H | 4.25392200  | -0.98210500 | -1.16562900 | H         | 6.25037900  | 0.25456500  | -0.85508500 |
| C | 5.47354400  | 1.30963100  | 1.70298400  | O         | 6.30743900  | -2.05965700 | 0.63192500  |
| H | 3.44834600  | 2.02845700  | 1.78983400  | C         | 7.53376800  | -1.77921900 | -0.01272000 |
| C | 6.37397700  | 0.44124900  | 1.07928900  | H         | 7.96541500  | -0.82390400 | 0.31901800  |
| H | 6.61171700  | -1.05657600 | -0.45484500 | H         | 8.21601100  | -2.58919200 | 0.26096400  |
| H | 5.80929000  | 1.95639100  | 2.51047800  | H         | 7.42952900  | -1.75842500 | -1.10742000 |
| H | 7.41487300  | 0.40995200  | 1.39209500  | C         | -1.83530200 | -0.05236500 | 0.14035700  |
| C | 1.62958600  | -1.97686700 | -0.11437000 | C         | -2.90928300 | 0.28125400  | -0.61585700 |
| C | 0.94794900  | -2.73602700 | 0.88749500  | C         | -1.82532400 | -1.15274700 | 1.13445800  |
| C | 2.11375200  | -2.69583600 | -1.25854100 | C         | -1.46067200 | -0.91375700 | 2.47886000  |
| C | 0.87202500  | -4.14804600 | 0.79265100  | C         | -2.05063600 | -2.49653000 | 0.75559500  |
| H | 0.66436900  | -2.25574600 | 1.82047200  | C         | -1.35532800 | -1.95737200 | 3.39699800  |
| C | 2.02356600  | -4.06905100 | -1.32894000 | H         | -1.25970000 | 0.10794600  | 2.78896100  |
| H | 2.55518600  | -2.13272100 | -2.07556100 | C         | -1.92647200 | -3.54292200 | 1.67400500  |
| C | 1.40913600  | -4.80993500 | -0.29126300 | H         | -2.35719400 | -2.70930600 | -0.26566600 |
| H | 0.38875100  | -4.70138500 | 1.59364100  | C         | -1.58070700 | -3.28059900 | 3.00080800  |
| H | 2.42354200  | -4.58958700 | -2.19625300 | H         | -1.08231400 | -1.73785400 | 4.42682400  |
| H | 1.34926600  | -5.89299500 | -0.36157300 | H         | -2.10864400 | -4.56573300 | 1.35031500  |
| H | -1.57828100 | -2.17354300 | -0.01342500 | H         | -1.48372500 | -4.09325900 | 3.71639900  |

|             |             |             |             |   |             |             |             |
|-------------|-------------|-------------|-------------|---|-------------|-------------|-------------|
| C           | -4.30943900 | -0.19639400 | -0.58756500 | C | 3.08528600  | 0.60418400  | 0.17135100  |
| C           | -5.10020400 | -0.02815300 | -1.74438900 | C | 3.19998500  | -0.46110000 | 1.08770500  |
| C           | -4.93681300 | -0.76784600 | 0.53993400  | C | 4.22985500  | 0.94409100  | -0.56915700 |
| C           | -6.43293500 | -0.43436300 | -1.78891800 | C | 4.39413200  | -1.15199900 | 1.25297900  |
| H           | -4.64923600 | 0.42971600  | -2.62277700 | H | 2.32826700  | -0.74107000 | 1.67065000  |
| C           | -6.27051700 | -1.17215100 | 0.49764000  | C | 5.43917200  | 0.25958500  | -0.40342100 |
| H           | -4.37738500 | -0.87980500 | 1.46193200  | H | 4.17734400  | 1.76877900  | -1.26951500 |
| C           | -7.02879300 | -1.01477700 | -0.66636600 | C | 5.52727100  | -0.79738100 | 0.50801800  |
| H           | -7.00888800 | -0.29225300 | -2.70105000 | H | 4.47006600  | -1.97298500 | 1.96089000  |
| H           | -6.72422100 | -1.60510700 | 1.38674300  | H | 6.29849200  | 0.56246500  | -0.99276800 |
| H           | -8.06937100 | -1.32902500 | -0.69390300 | O | 6.66213300  | -1.53767500 | 0.74387200  |
| H           | -2.74990400 | 1.04929100  | -1.37550200 | C | 7.82648300  | -1.20841600 | 0.01184100  |
| C           | 1.72401500  | -2.77289500 | -2.29456000 | H | 8.16525100  | -0.18258800 | 0.21602600  |
| C           | 0.76266600  | -1.57842100 | -2.25162400 | H | 8.60063100  | -1.90796800 | 0.33939100  |
| H           | 2.67143800  | -2.52123100 | -1.80839100 | H | 7.67852600  | -1.32465100 | -1.07134200 |
| H           | 1.29456500  | -3.64087400 | -1.77739800 | C | -1.69226800 | -0.78635800 | -0.00429700 |
| H           | 1.92964500  | -3.07038600 | -3.33013800 | C | -2.56090100 | -0.49888300 | -1.00916400 |
| C           | -0.58663000 | -1.93258600 | -2.88746200 | C | -2.08686000 | -1.29077100 | 1.33943700  |
| C           | 1.37742000  | -0.35241900 | -2.92283300 | C | -1.76319100 | -0.59409300 | 2.51878800  |
| H           | -1.29775300 | -1.10973800 | -2.77091100 | C | -2.72628600 | -2.54015500 | 1.47068900  |
| H           | -0.46369300 | -2.14179100 | -3.95682600 | C | -2.09677700 | -1.10841300 | 3.77316900  |
| H           | -1.02087000 | -2.82889400 | -2.42580400 | H | -1.24898400 | 0.35907700  | 2.43921300  |
| H           | 1.55587800  | -0.56189800 | -3.98411300 | C | -3.04664800 | -3.06019400 | 2.72470200  |
| H           | 0.70814400  | 0.51046200  | -2.84515200 | H | -2.96888500 | -3.10403100 | 0.57363000  |
| H           | 2.32884200  | -0.08838800 | -2.45453600 | C | -2.73970200 | -2.34369400 | 3.88461100  |
| O           | 0.56209600  | -1.22960800 | -0.84572600 | H | -1.84437700 | -0.54252600 | 4.66702600  |
| H           | 0.01212200  | -1.91968700 | -0.43371000 | H | -3.53731100 | -4.02862200 | 2.79527200  |
| <b>TS12</b> |             |             |             | H | -2.98958200 | -2.74746400 | 4.86283700  |
| -1 1        |             |             |             | C | -4.03359300 | -0.42382600 | -1.05529400 |
| Ni          | 0.15684800  | 0.38410300  | -0.09132700 | C | -4.65653900 | -0.43129200 | -2.32013500 |
| C           | -2.22790900 | 3.90820100  | 0.49879800  | C | -4.86059400 | -0.30033900 | 0.08004600  |
| C           | -1.90867000 | 2.54451600  | 0.41504300  | C | -6.04150800 | -0.34908000 | -2.44988300 |
| C           | -0.58304300 | 2.11892100  | 0.23556300  | H | -4.03604500 | -0.50604000 | -3.21052900 |
| C           | 0.40355300  | 3.12090500  | 0.15507000  | C | -6.24498900 | -0.20818300 | -0.04995500 |
| C           | 0.09724500  | 4.48151200  | 0.22421800  | H | -4.41393800 | -0.26287000 | 1.06620800  |
| C           | -1.22975500 | 4.88122600  | 0.39568100  | C | -6.84478000 | -0.23898600 | -1.31239700 |
| H           | -3.26527100 | 4.20898100  | 0.64083400  | H | -6.49333900 | -0.36359500 | -3.43877600 |
| H           | -2.71493400 | 1.82010600  | 0.48805600  | H | -6.85899100 | -0.10637100 | 0.84159700  |
| H           | 0.90602600  | 5.20511900  | 0.15115400  | H | -7.92542800 | -0.16851400 | -1.40802200 |
| H           | -1.48447200 | 5.93770200  | 0.45382000  | H | -2.10872900 | -0.26968300 | -1.97586300 |
| C           | 1.81570800  | 2.64258200  | 0.04565500  | C | 2.51074000  | -2.46315100 | -1.90193400 |
| O           | 2.78623200  | 3.41639000  | 0.02116400  | C | 1.06419000  | -1.94101000 | -1.95001200 |
| N           | 1.85304600  | 1.27558600  | 0.04048800  | H | 3.20732000  | -1.65511800 | -1.66306800 |
|             |             |             |             | H | 2.60657600  | -3.23286800 | -1.12820000 |

|           |             |             |             |           |             |             |             |
|-----------|-------------|-------------|-------------|-----------|-------------|-------------|-------------|
| H         | 2.80780600  | -2.90260600 | -2.86431800 | C         | -2.20805300 | 2.89030500  | 0.31908900  |
| C         | 0.12271100  | -3.09744000 | -2.34413100 | H         | -0.98383200 | 4.48785100  | -0.51673600 |
| C         | 0.96470600  | -0.80582900 | -2.98686400 | H         | -2.60540400 | 4.37567300  | -1.22319700 |
| H         | -0.91904200 | -2.75864600 | -2.39011800 | H         | -2.38993200 | 5.08782600  | 0.39372500  |
| H         | 0.38509400  | -3.51761900 | -3.32411100 | C         | -3.70063400 | 2.64178300  | 0.62144200  |
| H         | 0.18111200  | -3.90077500 | -1.59997100 | C         | -1.39837500 | 2.79938000  | 1.63101000  |
| H         | 1.26730800  | -1.14839700 | -3.98589100 | H         | -3.83930800 | 1.64815400  | 1.06136800  |
| H         | -0.06173000 | -0.42635700 | -3.06241100 | H         | -4.10913800 | 3.38438100  | 1.32071700  |
| H         | 1.61102600  | 0.02955200  | -2.69812200 | H         | -4.28458600 | 2.68909200  | -0.30581400 |
| O         | 0.71972600  | -1.49577200 | -0.63991600 | H         | -1.72393100 | 3.54326400  | 2.37210500  |
| H         | -0.54972600 | -1.29872500 | -0.43113900 | H         | -1.50535300 | 1.80394600  | 2.07886500  |
| <b>20</b> |             |             |             | H         | -0.33222200 | 2.96469900  | 1.43012800  |
| -1 1      |             |             |             | O         | -1.75168200 | 1.97900300  | -0.64713000 |
| Ni        | -0.93881100 | 0.39770600  | -0.38896400 | <b>21</b> |             |             |             |
| C         | -4.31471500 | -2.14539900 | -0.21145900 | -1 1      |             |             |             |
| C         | -3.56593400 | -0.96977300 | -0.37407500 | Ni        | -0.36175800 | -0.17123100 | 0.22608300  |
| C         | -2.17357500 | -0.99835000 | -0.23473600 | C         | -3.00538000 | -2.56273700 | 2.68967000  |
| C         | -1.55173600 | -2.22779500 | 0.04541700  | C         | -2.56509200 | -1.50157800 | 1.88469400  |
| C         | -2.29350200 | -3.39791000 | 0.21865900  | C         | -1.24514500 | -1.44667400 | 1.40972800  |
| C         | -3.68415400 | -3.35688200 | 0.09042800  | C         | -0.39076000 | -2.49519700 | 1.79096000  |
| H         | -5.39778900 | -2.11283200 | -0.32174300 | C         | -0.81592100 | -3.56355000 | 2.58264800  |
| H         | -4.07465500 | -0.03984700 | -0.61069100 | C         | -2.13656400 | -3.60166500 | 3.03534300  |
| H         | -1.76812700 | -4.32346300 | 0.44291500  | H         | -4.03500400 | -2.57712300 | 3.04556600  |
| H         | -4.27387400 | -4.26217800 | 0.22010900  | H         | -3.27619800 | -0.71763800 | 1.63200600  |
| C         | -0.05767400 | -2.20469200 | 0.12956200  | H         | -0.09966100 | -4.34115600 | 2.83829200  |
| O         | 0.60982900  | -3.21134900 | 0.42361400  | H         | -2.48411800 | -4.42515300 | 3.65624200  |
| N         | 0.40077400  | -0.95510700 | -0.17756300 | C         | 1.02886300  | -2.37497100 | 1.34167000  |
| C         | 1.75550700  | -0.60256300 | -0.16592000 | O         | 1.89251100  | -3.21664500 | 1.63635200  |
| C         | 2.13357400  | 0.59181200  | -0.82452600 | N         | 1.21952500  | -1.21894200 | 0.63516200  |
| C         | 2.78177600  | -1.32351900 | 0.47972100  | C         | 2.54786900  | -0.89839400 | 0.26585100  |
| C         | 3.44492800  | 1.04963700  | -0.82246100 | C         | 3.33525200  | -1.76226900 | -0.51879500 |
| H         | 1.37575100  | 1.16194000  | -1.35917800 | C         | 3.13737000  | 0.29255600  | 0.70518100  |
| C         | 4.10387600  | -0.86785800 | 0.47860500  | C         | 4.65153900  | -1.44786200 | -0.84213800 |
| H         | 2.53117700  | -2.25276100 | 0.97220700  | H         | 2.90602300  | -2.69743500 | -0.86301500 |
| C         | 4.44807400  | 0.32269600  | -0.16824600 | C         | 4.45926100  | 0.62146700  | 0.38928500  |
| H         | 3.71257400  | 1.96958500  | -1.33536100 | H         | 2.54291100  | 0.97756000  | 1.29948400  |
| H         | 4.85604300  | -1.45960500 | 0.99050300  | C         | 5.22546500  | -0.25230400 | -0.38952300 |
| O         | 5.71756700  | 0.85097400  | -0.22677500 | H         | 5.25570500  | -2.12212100 | -1.44370600 |
| C         | 6.74880900  | 0.15915600  | 0.45011200  | H         | 4.87122200  | 1.55783600  | 0.75059600  |
| H         | 6.89865700  | -0.85422100 | 0.05063000  | O         | 6.53283500  | -0.03315300 | -0.75762100 |
| H         | 7.66162700  | 0.73978000  | 0.29036100  | C         | 7.14307600  | 1.17066700  | -0.33411200 |
| H         | 6.55684900  | 0.08977300  | 1.53054600  | H         | 8.16055800  | 1.15452000  | -0.73501400 |
| C         | -2.03968200 | 4.29995400  | -0.28682300 | H         | 6.62068200  | 2.05638200  | -0.72269700 |

|             |             |             |             |   |             |             |             |
|-------------|-------------|-------------|-------------|---|-------------|-------------|-------------|
| H           | 7.19468800  | 1.24212000  | 0.76183700  | C | 2.37466900  | 1.13120600  | 2.06538400  |
| C           | -1.89872800 | 1.26152300  | 0.29669100  | C | 1.09367100  | 1.07367100  | 1.49087800  |
| C           | -2.24528400 | 0.40865200  | -0.53684000 | C | 0.03071400  | 1.75521900  | 2.12027000  |
| C           | -1.82667200 | 2.39453800  | 1.17227000  | C | 0.27080000  | 2.51179000  | 3.27115900  |
| C           | -0.99809200 | 2.39843200  | 2.31110700  | C | 1.54787900  | 2.57836100  | 3.82737500  |
| C           | -2.61238000 | 3.53367400  | 0.89639800  | H | 3.59489100  | 1.90650300  | 3.65905700  |
| C           | -0.96542700 | 3.50858400  | 3.15157200  | H | 3.20353100  | 0.60833000  | 1.60046800  |
| H           | -0.38777200 | 1.52654500  | 2.52148600  | H | -0.57727700 | 3.01874400  | 3.72366900  |
| C           | -2.57228900 | 4.63851400  | 1.74297700  | H | 1.72456100  | 3.16670900  | 4.72476200  |
| H           | -3.24572800 | 3.54187200  | 0.01428300  | C | -1.37230500 | 1.59092300  | 1.60898500  |
| C           | -1.74879200 | 4.63179700  | 2.87256100  | O | -2.25884400 | 2.39401900  | 1.96678300  |
| H           | -0.32121300 | 3.49668900  | 4.02682300  | N | -1.46643500 | 0.51061800  | 0.79764100  |
| H           | -3.18228700 | 5.50962700  | 1.51727700  | C | -2.64609800 | 0.19700800  | 0.09688600  |
| H           | -1.71731200 | 5.49693600  | 3.52990300  | C | -2.67852500 | -1.00857400 | -0.64620900 |
| C           | -3.00168400 | -0.33601300 | -1.50343200 | C | -3.80181600 | 1.00682900  | 0.04905200  |
| C           | -2.72113600 | -1.68554100 | -1.79398900 | C | -3.79000700 | -1.36980400 | -1.39694800 |
| C           | -4.06208500 | 0.30011300  | -2.18505700 | H | -1.81608800 | -1.66743000 | -0.58448200 |
| C           | -3.48315200 | -2.37505000 | -2.73489600 | C | -4.91889700 | 0.64203000  | -0.71127300 |
| H           | -1.91085700 | -2.17902900 | -1.26888900 | H | -3.81721300 | 1.92499300  | 0.61808900  |
| C           | -4.81518800 | -0.39746900 | -3.12596000 | C | -4.92374200 | -0.54738300 | -1.44238600 |
| H           | -4.28366300 | 1.34116700  | -1.96941500 | H | -3.79931900 | -2.30201000 | -1.95688400 |
| C           | -4.52997800 | -1.73707900 | -3.40537200 | H | -5.78029400 | 1.30256000  | -0.71493800 |
| H           | -3.25386400 | -3.41614400 | -2.94619100 | O | -5.97245200 | -0.99494300 | -2.21567400 |
| H           | -5.62686900 | 0.10758900  | -3.64360500 | C | -7.13782800 | -0.19668000 | -2.26283000 |
| H           | -5.11852500 | -2.27868600 | -4.14139700 | H | -7.84122600 | -0.71962100 | -2.91721400 |
| C           | -0.35052500 | 2.26786300  | -2.69993000 | H | -7.59766400 | -0.07834200 | -1.27079300 |
| C           | 0.75527100  | 1.32618600  | -2.14883400 | H | -6.93941600 | 0.80080200  | -2.68147800 |
| H           | -1.33962100 | 1.80430800  | -2.63124900 | C | 1.94109600  | -0.39103800 | -0.56166300 |
| H           | -0.37152800 | 3.19821400  | -2.11815000 | C | 1.54501600  | 0.85114500  | -0.48599200 |
| H           | -0.17951400 | 2.53036100  | -3.75453800 | C | 2.87292000  | -1.32835700 | -1.13707000 |
| C           | 2.12009800  | 2.02038800  | -2.38552600 | C | 4.18678200  | -0.94464600 | -1.48791400 |
| C           | 0.73527400  | 0.00764100  | -2.95871200 | C | 2.48356200  | -2.67041100 | -1.34124500 |
| H           | 2.93992600  | 1.36597900  | -2.07431800 | C | 5.07257200  | -1.86780300 | -2.04024700 |
| H           | 2.27248900  | 2.28733600  | -3.44164500 | H | 4.50737600  | 0.07859000  | -1.31234200 |
| H           | 2.17926800  | 2.93961500  | -1.78906300 | C | 3.37346600  | -3.58208800 | -1.90479000 |
| H           | 0.90055300  | 0.17826400  | -4.03281000 | H | 1.48545000  | -2.95343200 | -1.01760800 |
| H           | 1.51849800  | -0.66676300 | -2.59575800 | C | 4.66831000  | -3.18831700 | -2.25866100 |
| H           | -0.22907100 | -0.50220900 | -2.84723000 | H | 6.08088700  | -1.55557600 | -2.30248400 |
| O           | 0.62446100  | 1.10881700  | -0.77929600 | H | 3.05839100  | -4.61113000 | -2.06251500 |
|             |             |             |             | H | 5.35911200  | -3.90535800 | -2.69569100 |
|             |             |             |             | C | 1.60116300  | 2.12681100  | -1.19445000 |
|             |             |             |             | C | 2.44628700  | 2.23074600  | -2.32106400 |
|             |             |             |             | C | 0.83196300  | 3.24970500  | -0.83968700 |
|             |             |             |             | C | 2.52343100  | 3.41294300  | -3.05214100 |
| <b>TS13</b> |             |             |             |   |             |             |             |
| -1 1        |             |             |             |   |             |             |             |
| Ni          | 0.33615500  | -0.37187100 | 0.46370800  |   |             |             |             |
| C           | 2.59616400  | 1.87312600  | 3.22920500  |   |             |             |             |

|           |             |             |             |    |             |             |             |
|-----------|-------------|-------------|-------------|----|-------------|-------------|-------------|
| H         | 3.03440400  | 1.37035500  | -2.62404600 | H  | -0.46634200 | -2.16413100 | 4.56491900  |
| C         | 0.91241100  | 4.43094200  | -1.57650300 | H  | -0.75528400 | -4.77271400 | 1.15410800  |
| H         | 0.16898500  | 3.19893000  | 0.01467000  | H  | -1.00302100 | -4.40065100 | 3.60545200  |
| C         | 1.75930500  | 4.52358800  | -2.68242500 | C  | 2.61708100  | -1.67538000 | -0.70113800 |
| H         | 3.18278200  | 3.46575700  | -3.91532600 | C  | 2.87194100  | -2.21026500 | -1.97888800 |
| H         | 0.30484000  | 5.28260500  | -1.28106700 | C  | 3.26751100  | -2.26805600 | 0.39675700  |
| H         | 1.82148600  | 5.44726400  | -3.25218700 | C  | 3.72196100  | -3.30337700 | -2.14853700 |
| C         | -1.40916200 | -2.51317200 | 2.47546800  | H  | 2.39094500  | -1.76435700 | -2.84523400 |
| C         | -0.22871100 | -3.01368000 | 1.61166400  | C  | 4.11869200  | -3.36080400 | 0.22847000  |
| H         | -1.24583100 | -1.47708600 | 2.78990400  | H  | 3.10209200  | -1.86111600 | 1.38945000  |
| H         | -2.34311200 | -2.53996500 | 1.90296900  | C  | 4.34953300  | -3.88706900 | -1.04482900 |
| H         | -1.54245700 | -3.12892800 | 3.37655600  | H  | 3.89318100  | -3.70066000 | -3.14667200 |
| C         | -0.52131000 | -4.46621200 | 1.16922200  | H  | 4.60800600  | -3.79759100 | 1.09617700  |
| C         | 1.05807000  | -3.00658400 | 2.47094400  | H  | 5.01395500  | -4.73774900 | -1.17647200 |
| H         | 0.31384500  | -4.85841900 | 0.57543600  | C  | -0.53469600 | 0.96101700  | -2.16610000 |
| H         | -0.67789000 | -5.13784500 | 2.02502600  | O  | -1.05533400 | 0.82414900  | -3.28914200 |
| H         | -1.42084300 | -4.49480400 | 0.54284000  | N  | -1.16357300 | 0.87540000  | -0.96639800 |
| H         | 0.96325800  | -3.63437100 | 3.36865800  | Ni | 0.20201200  | 1.18080300  | 0.64521200  |
| H         | 1.90873100  | -3.37507800 | 1.88436600  | C  | -2.52362100 | 0.50285700  | -0.86467100 |
| H         | 1.29203900  | -1.98550500 | 2.79595200  | C  | -3.26456300 | -0.16652300 | -1.85829800 |
| O         | -0.05924700 | -2.25619500 | 0.44406200  | C  | -3.19874100 | 0.79070200  | 0.34415700  |
| <b>22</b> |             |             |             | C  | -4.59977300 | -0.53120400 | -1.65339800 |
| -1 1      |             |             |             | H  | -2.79061000 | -0.38918100 | -2.80297800 |
| C         | 2.59709600  | 2.82657900  | -3.15932300 | C  | -4.52205200 | 0.42772100  | 0.55393100  |
| C         | 1.27960200  | 2.40575700  | -3.00197500 | H  | -2.66314700 | 1.30846000  | 1.13722200  |
| C         | 0.93504100  | 1.34948500  | -2.14205000 | C  | -5.24097000 | -0.23857900 | -0.44721200 |
| C         | 1.96205300  | 0.65835900  | -1.45172900 | H  | -5.12364500 | -1.04613500 | -2.45235600 |
| C         | 3.29365300  | 1.07427800  | -1.65809400 | H  | -5.01847300 | 0.65728400  | 1.49289200  |
| C         | 3.61429500  | 2.15054200  | -2.48071600 | O  | -6.54711900 | -0.54884000 | -0.15117400 |
| H         | 2.82928600  | 3.66200500  | -3.81567700 | C  | -7.30031800 | -1.22943900 | -1.13642100 |
| H         | 0.48214100  | 2.88594500  | -3.56117400 | H  | -8.29467900 | -1.38325000 | -0.70813500 |
| H         | 4.08926500  | 0.53812700  | -1.14815900 | H  | -7.39789700 | -0.63928800 | -2.05893800 |
| H         | 4.65232700  | 2.45460500  | -2.59523000 | H  | -6.86441600 | -2.20735500 | -1.38510600 |
| C         | 1.70597500  | -0.49675700 | -0.53410000 | C  | 2.63382100  | 2.00379600  | 2.68103800  |
| C         | 0.74396500  | -0.41405700 | 0.41919000  | C  | 1.28355000  | 2.74771100  | 2.61526000  |
| C         | 0.28379500  | -1.51515000 | 1.29152200  | H  | 2.58203100  | 1.17831800  | 3.40133300  |
| C         | 0.09948900  | -1.30990600 | 2.67474100  | H  | 2.88406000  | 1.58273100  | 1.70176300  |
| C         | -0.04562500 | -2.78107200 | 0.76270900  | H  | 3.45246100  | 2.67035400  | 2.98650600  |
| C         | -0.34335200 | -2.34402000 | 3.49887300  | C  | 1.39366300  | 3.92174400  | 1.61880200  |
| H         | 0.29148800  | -0.31716600 | 3.07266200  | C  | 0.93817100  | 3.30208000  | 4.01400600  |
| C         | -0.50433900 | -3.80715800 | 1.58807100  | H  | 0.43169700  | 4.44511900  | 1.54654200  |
| H         | 0.05811300  | -2.95177700 | -0.30442800 | H  | 2.15742900  | 4.65212100  | 1.92119500  |
| C         | -0.64587300 | -3.59917700 | 2.96276900  | H  | 1.65314000  | 3.55423800  | 0.61967400  |
|           |             |             |             | H  | 1.69747700  | 4.00621800  | 4.38066300  |



|             |             |             |             |           |             |             |             |
|-------------|-------------|-------------|-------------|-----------|-------------|-------------|-------------|
| H           | -0.02690500 | 3.82224700  | 3.98434400  | C         | 2.12493100  | 0.68488900  | 0.71689200  |
| H           | 0.85357700  | 2.48008800  | 4.73502200  | C         | 2.88381300  | -0.05848400 | 1.62913200  |
| O           | 0.24761700  | 1.86683700  | 2.26189300  | C         | 2.79049200  | 1.31824200  | -0.34198700 |
| <b>TS14</b> |             |             |             | C         | 4.26873700  | -0.16549500 | 1.50138800  |
| -1 1        |             |             |             | H         | 2.38559300  | -0.55161200 | 2.45768000  |
| C           | -3.10360900 | 1.23050400  | 3.87811000  | C         | 4.17000100  | 1.20965200  | -0.48523300 |
| C           | -1.82735900 | 1.53487600  | 3.43844400  | H         | 2.21249800  | 1.89659400  | -1.05705100 |
| C           | -1.23150900 | 0.85297900  | 2.35690600  | C         | 4.92097300  | 0.46918300  | 0.43599000  |
| C           | -1.93581900 | -0.20879400 | 1.70073100  | H         | 4.82273900  | -0.74500600 | 2.23157800  |
| C           | -3.23843600 | -0.50850300 | 2.19448500  | H         | 4.68423300  | 1.69737600  | -1.30823700 |
| C           | -3.81030500 | 0.19200100  | 3.24041100  | O         | 6.27234800  | 0.42576000  | 0.21387500  |
| H           | -3.55201200 | 1.78181000  | 4.70084400  | C         | 7.07368200  | -0.30811200 | 1.12344200  |
| H           | -1.24035400 | 2.30962000  | 3.92138500  | H         | 8.10245400  | -0.21027000 | 0.76699900  |
| H           | -3.80824700 | -1.29408300 | 1.70911400  | H         | 7.00976700  | 0.09533900  | 2.14352700  |
| H           | -4.81943900 | -0.05823800 | 3.56232100  | H         | 6.80319400  | -1.37302600 | 1.14090200  |
| C           | -1.35037300 | -0.93494500 | 0.59943800  | C         | -2.82646500 | 3.71725900  | -0.94179100 |
| C           | -0.32188100 | -0.32034000 | -0.15241000 | C         | -2.36193400 | 2.89385100  | -2.16259000 |
| C           | 0.50290500  | -1.10746900 | -1.12559600 | H         | -2.89410800 | 3.07434800  | -0.05657600 |
| C           | 0.56621300  | -0.72086700 | -2.47628400 | H         | -2.09654900 | 4.50809100  | -0.72656200 |
| C           | 1.24084100  | -2.23335800 | -0.72063500 | H         | -3.80701000 | 4.18931800  | -1.10067800 |
| C           | 1.32516300  | -1.45004300 | -3.39327000 | C         | -2.28895800 | 3.81857500  | -3.39845400 |
| H           | 0.00602600  | 0.15549500  | -2.79363200 | C         | -3.37851100 | 1.76293100  | -2.43320300 |
| C           | 2.01407600  | -2.95104400 | -1.63336200 | H         | -1.93776300 | 3.25155100  | -4.26932900 |
| H           | 1.20193000  | -2.54574900 | 0.31858900  | H         | -3.26126200 | 4.26635900  | -3.64699500 |
| C           | 2.05709600  | -2.56409100 | -2.97505700 | H         | -1.57359300 | 4.63086100  | -3.21851100 |
| H           | 1.35047700  | -1.14094800 | -4.43585300 | H         | -4.38550600 | 2.14895100  | -2.64668500 |
| H           | 2.58263100  | -3.81494000 | -1.29647500 | H         | -3.05399300 | 1.16197000  | -3.29232800 |
| H           | 2.65832500  | -3.12443600 | -3.68745200 | H         | -3.44413300 | 1.09871300  | -1.56400900 |
| C           | -1.87353800 | -2.28356700 | 0.25033900  | O         | -1.08526700 | 2.35970800  | -1.96469100 |
| C           | -2.03444900 | -3.27837600 | 1.23979400  | <b>23</b> |             |             |             |
| C           | -2.23945100 | -2.62851900 | -1.06738800 | -1 1      |             |             |             |
| C           | -2.52133300 | -4.54744900 | 0.92900200  | Ni        | -1.23431700 | -1.59719300 | -0.03802300 |
| H           | -1.75920200 | -3.04805100 | 2.26559300  | C         | -5.11701300 | 0.04848000  | 0.05138400  |
| C           | -2.71682700 | -3.90101200 | -1.38241100 | C         | -4.11245600 | -0.93029200 | 0.03011700  |
| H           | -2.15202500 | -1.88161900 | -1.84985400 | C         | -2.76477500 | -0.55424200 | 0.00013900  |
| C           | -2.86273700 | -4.87083600 | -0.38755300 | C         | -2.44241100 | 0.81799200  | -0.00408400 |
| H           | -2.62284600 | -5.29092800 | 1.71711900  | C         | -3.44394200 | 1.79183000  | 0.01454300  |
| H           | -2.98796800 | -4.13063800 | -2.41072800 | C         | -4.78659300 | 1.40744400  | 0.04185400  |
| H           | -3.23810500 | -5.86149400 | -0.63315100 | H         | -6.16317100 | -0.25361500 | 0.07421000  |
| C           | 0.18195700  | 1.17701100  | 2.08181300  | H         | -4.38259900 | -1.98267700 | 0.03480000  |
| O           | 0.89246100  | 1.77617400  | 2.89875400  | H         | -3.15085600 | 2.83899700  | 0.00918400  |
| N           | 0.69851200  | 0.74761900  | 0.83888800  | H         | -5.57165900 | 2.16097600  | 0.05632900  |
| Ni          | -0.35342800 | 1.50551000  | -0.55113700 | C         | -0.98640800 | 1.18816500  | -0.02036700 |

|           |             |             |             |           |             |             |             |
|-----------|-------------|-------------|-------------|-----------|-------------|-------------|-------------|
| O         | -0.61595400 | 2.37676500  | -0.03361000 | H         | 3.83635100  | 1.55855300  | -1.26728100 |
| N         | -0.21528800 | 0.06492600  | -0.01184600 | O         | 5.34830300  | -0.11503700 | 0.30358000  |
| C         | 1.17880000  | 0.07129000  | -0.00455400 | H         | -0.06877200 | -2.72083500 | -0.53600200 |
| C         | 1.82934800  | -1.18672800 | 0.03506200  | C         | 6.12575300  | 0.75742800  | -0.49456300 |
| C         | 2.01224500  | 1.21059000  | -0.03216100 | H         | 5.92899800  | 1.81360400  | -0.26188500 |
| C         | 3.21185000  | -1.30691900 | 0.04490200  | H         | 7.17052500  | 0.53259700  | -0.26278700 |
| H         | 1.22907200  | -2.09776400 | 0.06726200  | H         | 5.95543700  | 0.59180800  | -1.56777900 |
| C         | 3.40639200  | 1.09318100  | -0.02157100 |           |             |             |             |
| H         | 1.54810500  | 2.18664800  | -0.06029300 | <b>25</b> |             |             |             |
| C         | 4.01997500  | -0.16186400 | 0.01633100  | O 1       |             |             |             |
| H         | 3.68568200  | -2.28449300 | 0.07762500  | Ni        | -0.97546500 | -1.40406500 | -0.00017200 |
| H         | 4.00097800  | 2.00112000  | -0.04436200 | C         | 3.12107400  | -0.55182300 | 0.00094600  |
| O         | 5.38031800  | -0.37783200 | 0.03109300  | C         | 1.94111100  | -1.31697400 | 0.00134000  |
| H         | -1.98877900 | -2.92351100 | -0.07235600 | C         | 0.72007300  | -0.64874700 | 0.00024200  |
| C         | 6.22102200  | 0.75889600  | 0.01417600  | C         | 0.66244700  | 0.74888100  | -0.00095900 |
| H         | 6.05711500  | 1.40457800  | 0.88876600  | C         | 1.83284700  | 1.50363700  | -0.00098900 |
| H         | 7.24719100  | 0.38154600  | 0.04048900  | C         | 3.06744100  | 0.84409900  | -0.00018800 |
| H         | 6.08569500  | 1.35670900  | -0.89857400 | H         | 4.08425700  | -1.05688800 | 0.00156000  |
|           |             |             |             | H         | 2.00518700  | -2.40346900 | 0.00241800  |
| <b>24</b> |             |             |             | H         | 1.76849900  | 2.58865000  | -0.00147600 |
| -1 1      |             |             |             | H         | 3.98995000  | 1.41864800  | -0.00034000 |
| Ni        | -1.22816500 | -1.64794800 | -0.29808800 | C         | -0.72517700 | 1.31191700  | -0.00103900 |
| C         | -5.13118400 | 0.15257900  | -0.03248800 | O         | -1.01207500 | 2.51073300  | 0.00189900  |
| C         | -4.15289100 | -0.84472700 | -0.17302200 | N         | -1.63553700 | 0.29546600  | -0.00460900 |
| C         | -2.78872600 | -0.52636900 | -0.10558600 | C         | -3.06046800 | 0.56526300  | 0.00214400  |
| C         | -2.44767400 | 0.81823200  | 0.10458700  | H         | -3.60795900 | -0.38588300 | -0.00073300 |
| C         | -3.40527000 | 1.82422100  | 0.24076100  | H         | -3.36583600 | 1.12656700  | 0.89562000  |
| C         | -4.76028600 | 1.48590800  | 0.17229400  | H         | -3.37178900 | 1.13454800  | -0.88414700 |
| H         | -6.18708900 | -0.11128600 | -0.08297200 |           |             |             |             |
| H         | -4.47755700 | -1.87478000 | -0.33375700 | <b>26</b> |             |             |             |
| H         | -3.08404400 | 2.85167900  | 0.39749700  | -1 1      |             |             |             |
| H         | -5.52397900 | 2.25409300  | 0.27739800  | Ni        | 0.96169700  | -1.44861200 | 0.00131400  |
| C         | -0.97894600 | 1.08581800  | 0.18029200  | C         | -3.14611900 | -0.46948700 | -0.00236800 |
| O         | -0.50009100 | 2.21481200  | 0.35125400  | C         | -1.98776200 | -1.26376800 | -0.00029200 |
| N         | -0.25906500 | -0.08198400 | 0.06310100  | C         | -0.72551300 | -0.66302200 | 0.00112000  |
| C         | 1.15244400  | -0.05481300 | 0.09622000  | C         | -0.64201700 | 0.74444400  | 0.00145000  |
| C         | 1.85920500  | -0.94091600 | 0.93083800  | C         | -1.79233000 | 1.53324200  | -0.00018800 |
| C         | 1.90130700  | 0.83471000  | -0.68903800 | C         | -3.05229600 | 0.92471900  | -0.00231800 |
| C         | 3.24759100  | -0.94027300 | 0.97509600  | H         | -4.12550300 | -0.94651600 | -0.00414100 |
| H         | 1.29507000  | -1.64352500 | 1.53546400  | H         | -2.07534700 | -2.34700600 | 0.00004400  |
| C         | 3.29831200  | 0.85079200  | -0.64536600 | H         | -1.68300200 | 2.61566000  | 0.00001200  |
| H         | 1.38139200  | 1.53413400  | -1.33377700 | H         | -3.95487200 | 1.53291800  | -0.00434600 |
| C         | 3.98100400  | -0.04202600 | 0.18731400  | C         | 0.74464000  | 1.32968300  | 0.00116700  |
| H         | 3.78622000  | -1.63120800 | 1.61794400  | O         | 0.96503000  | 2.55730300  | 0.00604200  |

|   |            |             |             |
|---|------------|-------------|-------------|
| N | 1.66447900 | 0.34407000  | -0.00411000 |
| H | 0.45576600 | -2.90194000 | 0.00842000  |
| C | 3.05771500 | 0.73572200  | -0.00533900 |
| H | 3.69034500 | -0.15901800 | 0.07214800  |
| H | 3.34789200 | 1.27100800  | -0.92516700 |
| H | 3.30771300 | 1.39991300  | 0.83728700  |

**27**

-1 1

|    |             |             |             |
|----|-------------|-------------|-------------|
| Ni | 1.09226100  | -1.38406200 | -0.00513500 |
| C  | -3.16099700 | -0.64743600 | 0.00243000  |
| C  | -1.95310400 | -1.36550300 | 0.00257900  |
| C  | -0.71986800 | -0.69864700 | 0.00299700  |
| C  | -0.74693300 | 0.70622600  | 0.00308000  |
| C  | -1.93460100 | 1.43620400  | 0.00017000  |
| C  | -3.15465200 | 0.75059200  | 0.00053700  |
| H  | -4.11065300 | -1.18178100 | 0.00335500  |
| H  | -1.99748700 | -2.45662900 | 0.00258100  |
| H  | -1.89451000 | 2.52373800  | -0.00323500 |
| H  | -4.09422800 | 1.30003100  | -0.00124500 |
| C  | 0.60762500  | 1.34338900  | 0.00094700  |
| O  | 0.80424100  | 2.57059200  | -0.01598300 |
| N  | 1.59031200  | 0.40358800  | 0.02066600  |
| C  | 2.96672800  | 0.86440700  | 0.00889000  |
| H  | 3.62531100  | 0.01866300  | 0.20971200  |
| H  | 3.24813700  | 1.30217300  | -0.96289700 |
| H  | 3.13016800  | 1.63868400  | 0.77197400  |
| H  | 2.51864700  | -2.11638000 | -0.02303500 |
